# Supplementary material for: Phosphine-catalyzed regiodivergent annulations of γ-substituted allenoates with conjugated dienes
Source: Royal Society of Chemistry journal article supplement (doi:10.1039/c9cc05207k), 2019-01-01

# *Supporting Information*

## **Phosphine-Catalyzed Regiodivergent Annulations of $\gamma$ -Substituted Allenates with Conjugated Dienes**

Zhenjie Gan,<sup>a</sup> Yanchuan Gong,<sup>a</sup> Yunpeng Chu,<sup>a</sup> Er-Qing Li,<sup>\*,a</sup> You, Huang<sup>\*,b</sup> and Zheng Duan<sup>\*,a</sup>

<sup>a</sup> *College of Chemistry and Molecular Engineering, International Phosphorus Laboratory, International Joint Research Laboratory for Functional Organophosphorus Materials of Henan Province, Zhengzhou University, Zhengzhou 450001, P. R. China*

<sup>b</sup> *State Key Laboratory and Institute of Elemento-Organic Chemistry, College of Chemistry, Nankai University, Tianjin 300071 (China).*

|                                                                            |     |
|----------------------------------------------------------------------------|-----|
| 1. General Experimental Details.....                                       | S1  |
| 2. General procedure for synthesis of diene.....                           | S1  |
| 3. General procedure for synthesis of $\gamma$ -Substituted Allenates..... | S1  |
| 4. General procedure for synthesis of <b>3</b> .....                       | S2  |
| 5. General procedure for synthesis of <b>4</b> .....                       | S20 |
| 6. Copies of <sup>1</sup> H NMR, <sup>13</sup> C NMR Spectra .....         | S27 |
| 7. X-ray crystal structures .....                                          | S61 |

## 1. General Experimental Details

All reactions were performed under nitrogen using solvents dried by standard methods. NMR spectra were obtained using Bruker AV300 spectrometer. Chemical shifts are expressed in parts per million (ppm) downfield from internal TMS. HRMS spectra were obtained on an Agilent 1290-6540 UHPLC Q-ToF HR-MS spectrometer. X-ray crystallographic analyses were performed on an Oxford diffraction Gemini E diffractometer. Melting Point: heating rate: 4 °C/min, the thermometer was not corrected. Silica gel (200-300 mesh) was used for the chromatographic separations. All commercially available reagents were used without further purification.

## 2. General procedure for synthesis of diene

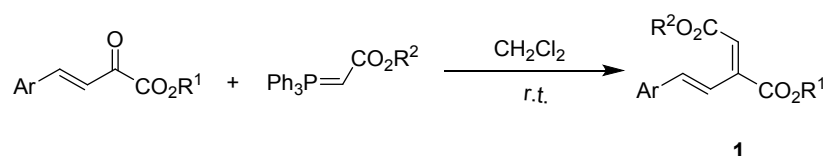

The general procedure was followed at r.t. with  $\beta$ ,  $\gamma$ -unsaturated  $\alpha$ -keto esters<sup>1</sup> (5 mmol, 1.0 equiv) and ylide (5 mmol, 1.0 equiv) in 50 mL of DCM. When completed, the resulting mixture was carefully evaporated to remove most of the solvent, and the residue was extracted by petroleum ether (b.p. 30 - 60 °C, 4  $\times$  30 mL). The combined extracting was concentrated and the residue was subjected to column chromatography (eluant: 20% EtOAc in petroleum ether) to provide the diene **1** as yellow oil.

## 3. General procedure for synthesis of $\gamma$ -substituted allenates.

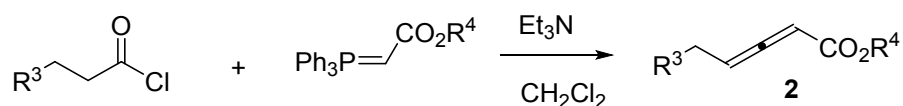

Allenate **2** is a known compound and synthesized according to a similar method developed by Hansen. To a solution of yield (0.1 mol) in dichloromethane (400 mL) was added 1.1 equivalent of triethylamine (0.11 mol). After stirred for about 15 minutes, 1.1 equivalent of acyl chloride (0.11 mol) was added dropwise. Then the

reaction mixture was allowed to be warmed up to room temperature and stirred overnight. The resulting mixture was carefully evaporated to remove most of the solvent, and the residue was extracted by petroleum ether (b.p. 30 - 60 °C, 5 × 100 mL). The combined extracting was concentrated and the residue was subjected to column chromatography (eluant: 5% EtOAc in petroleum ether) to provide the allenolate **2** as yellow oil.<sup>2</sup>

#### 4. General procedure for synthesis of **3**.

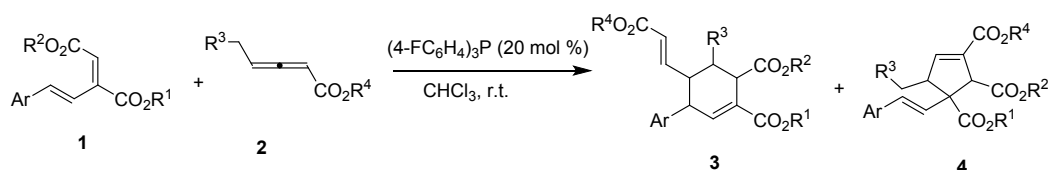

To a dry flask filled with nitrogen were added **1** (0.3 mmol) and **2** (0.45 mmol) in 3 mL CHCl<sub>3</sub>. (4-FC<sub>6</sub>H<sub>4</sub>)<sub>3</sub>P (0.06 mmol) was added. This solution was stirred at r.t. until the complete consumption of the starting material as monitored by TLC. After the removal of the solvent, the residue was subjected to chromatography on a silica gel (60 - 120 mesh) column (eluant: 20% EtOAc in petroleum ether) to afford **3**.

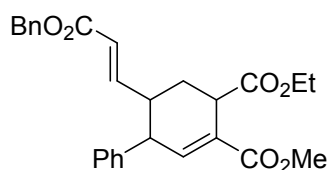

#### 4-Ethyl 3-methyl (*E*)-6-(3-(benzyloxy)-3-oxoprop-1-en-1-yl)-1,4,5,6-tetrahydro-[1,1'-biphenyl]-3,4-dicarboxylate **3a**.

The reaction of diene (78.0 mg, 0.3 mmol, 1.0 equiv) and allenolate (84.7 mg, 0.45 mmol, 1.5 equiv), after a flash column chromatography (petroleum: AcOEt = 5:1) afforded the product **3a** (107.6 mg, 80% yield) and [3 + 2] adduct (2.7 mg, 2% yield).

White solid. **MP**: 123 - 124 °C. <sup>1</sup>H NMR (300 MHz, CDCl<sub>3</sub>) δ 1.27 (t, *J* = 7.1 Hz, 3H, CH<sub>3</sub>), 1.84 (dd, *J* = 24.4, 11.7 Hz, 1H, CH), 2.29 – 2.57 (m, 2H, CH<sub>2</sub>), 3.39 – 3.44 (m, 1H, CH), 3.60 – 3.66 (m, 1H, CH), 3.74 (s, 3H, COOCH<sub>3</sub>), 4.13 – 4.23 (m, 2H, COOCH<sub>2</sub>), 5.12 (s, 2H, COOCH<sub>2</sub>Ph), 5.68 (d, *J* = 15.8 Hz, 1H, HC=C), 6.86 (dd,

$J = 15.8, 7.9$  Hz, 1H, C=CH), 7.02 (t,  $J = 2.1$  Hz, 1H, HC=C), 7.02 – 7.10 (m, 2H, ArH), 7.26 – 7.36 (m, 8H, ArH) ppm.  $^{13}\text{C}$  NMR (75 MHz,  $\text{CDCl}_3$ )  $\delta$  14.2 (s,  $\text{CH}_3$ ), 31.8 (s,  $\text{CH}_2$ ), 42.0 (s, CH), 43.5 (s, CH), 47.8 (s, CH), 51.9 (s,  $\text{COOCH}_3$ ), 61.0 (s,  $\text{COOCH}_2$ ), 66.2 (s,  $\text{COOCH}_2\text{Ph}$ ), 122.0 (s, CH), 127.4 (s, CH), 128.1 (s, 2CH), 128.2 (s, 2CH), 128.2 (s, CH), 128.5 (s, 2CH), 128.5 (s, C), 128.8 (s, 2CH), 135.9 (s, C), 141.2 (s, C), 143.0 (s, CH), 149.5 (s, CH), 165.8 (s, C), 166.7 (s, C), 173.8 (s, C) ppm. IR (KBr): 2029, 1727, 1370, 1270, 1114, 1032, 733, 700, 524  $\text{cm}^{-1}$ . HRMS (ESI,  $m/z$ ): Calcd for  $\text{C}_{27}\text{H}_{29}\text{O}_6$   $[\text{M}+\text{H}]^+$ : 449.1959, found: 449.1957.

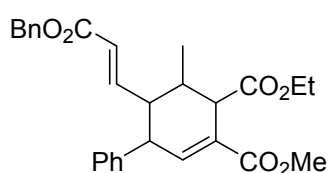

**4-Ethyl 3-methyl (E)-6-(3-(benzyloxy)-3-oxoprop-1-en-1-yl)-5-methyl-1, 4, 5, 6-tetrahydro-[1, 1'-biphenyl]-3, 4-dicarboxylate 3b.**

The reaction of diene (78.0 mg, 0.3 mmol, 1.0 equiv) and allenolate (63.1 mg, 0.45 mmol, 1.5 equiv), after a flash column chromatography (petroleum: AcOEt = 5:1) afforded the product **3b** (102.1 mg, 85% yield) and [3 + 2] adduct (6.9 mg, 5% yield). Colorless oil.  $^1\text{H}$  NMR (300 MHz,  $\text{CDCl}_3$ )  $\delta$  1.04 (d,  $J = 6.4$  Hz, 3H,  $\text{CH}_3$ ), 1.29 (t,  $J = 7.1$  Hz, 3H,  $\text{CH}_3$ ), 2.01 – 2.20 (m, 2H, 2CH), 3.15 – 3.20 (m, 1H, CH), 3.44 – 3.49 (m, 1H, CH), 3.72 (s, 3H,  $\text{COOCH}_3$ ), 4.16 – 4.30 (m, 2H,  $\text{COOCH}_2$ ), 5.05 – 5.14 (m, 2H,  $\text{COOCH}_2\text{Ph}$ ), 5.41 (d,  $J = 15.6$  Hz, 1H, HC=C), 6.70 (dd,  $J = 15.6, 9.8$  Hz, 1H, HC=C), 7.00 – 7.03 (m, 2H, HC=C; ArH), 7.07 (t,  $J = 2.1$  Hz, 1H, ArH), 7.21–7.25 (m, 1H, ArH), 7.27–7.33 (m, 5H, ArH), 7.36 – 7.53 (m, 2H, ArH).  $^{13}\text{C}$  NMR (75 MHz,  $\text{CDCl}_3$ )  $\delta$  14.2 (s,  $\text{CH}_3$ ), 18.4 (s,  $\text{CH}_3$ ), 36.5 (s, CH), 48.1 (s, CH), 49.8 (s, CH), 51.5 (s, CH), 51.9 (s,  $\text{COOCH}_3$ ), 61.0 (s,  $\text{COOCH}_2$ ), 66.1 (s,  $\text{COOCH}_2\text{Ph}$ ), 123.9 (s, CH), 127.2 (s, CH), 128.0 (s, 2CH), 128.2 (s, CH), 128.3 (s, 2CH), 128.5 (s, 2CH), 128.6 (s, C), 128.7 (s, 2CH), 135.9 (s, C), 141.3 (s, C), 143.1 (s, CH), 148.9 (s, CH), 165.5 (s, C), 166.5 (s, C), 173.9 (s, C). IR (KBr): 2980, 1715, 1388, 1257, 1116, 1033, 751, 705, 523  $\text{cm}^{-1}$ . HRMS (ESI,  $m/z$ ): Calcd for  $\text{C}_{28}\text{H}_{31}\text{O}_6$   $[\text{M}+\text{H}]^+$ : 463.2115., found: 463.2116.

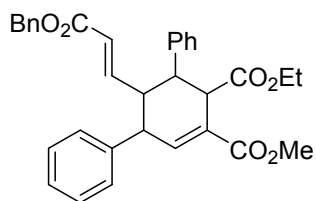

**4'-Ethyl 5'-methyl (*E*)-2'-(3-(benzyloxy)-3-oxoprop-1-en-1-yl)-1', 2', 3', 4'-tetrahydro-[1, 1': 3', 1''-terphenyl]-4', 5'-dicarboxylate **3c**.**

The reaction of diene (78.0 mg, 0.3 mmol, 1.0 equiv) and allenolate (118.9 mg, 0.45 mmol, 1.5 equiv), after a flash column chromatography (petroleum: AcOEt = 5:1) afforded the product **3c** (121.2 mg, 77% yield) and [3 + 2] adduct (7.9 mg, 5% yield).

Colorless oil. <sup>1</sup>H NMR (300 MHz, CDCl<sub>3</sub>) δ 0.90 (t, *J* = 7.1 Hz, 3H, CH<sub>3</sub>), 2.79 (dd, *J* = 21.2, 10.1 Hz, 1H, CH), 3.18 (t, *J* = 11.2 Hz, 1H, CH), 3.63 – 3.68 (m, 1H, CH), 3.74 – 3.79 (m, 4H, COOCH<sub>3</sub>; CH), 3.89 – 3.96 (m, 2H, COOCH<sub>2</sub>), 4.93 – 5.02 (m, 2H, COOCH<sub>2</sub>Ph), 5.13 (d, *J* = 15.6 Hz, 1H, HC=C), 6.54 (dd, *J* = 15.6, 9.7 Hz, 1H, C=CH), 7.04 – 7.10 (m, 1H, CH=C), 7.12 – 7.18 (m, 6H, ArH), 7.21 – 7.23 (m, 1H, ArH), δ 7.25 – 7.33 (m, 8H, ArH) ppm. <sup>13</sup>C NMR (75 MHz, CDCl<sub>3</sub>) δ 13.8 (s, CH<sub>3</sub>), 48.9 (s, CH), 49.8 (s, CH), 50.0 (s, CH), 50.1 (s, CH), 52. (s, COOCH<sub>3</sub>), 60.6 (s, COOCH<sub>2</sub>), 65.7 (s, COOCH<sub>2</sub>Ph), 123.7 (s, CH), 127.3 (s, CH), 127.4 (s, CH), 127.5 (s, 2CH), 128.0 (s, CH), 128.0 (s, 2CH), 128.4 (s, 2CH), 128.4 (s, 2CH), 128.7 (s, 2CH), 128.8 (s, 2CH), 129.0 (s, C), 136.0 (s, C), 139.7 (s, C), 140.9 (s, C), 143.3 (s, CH), 147.9 (s, CH), 165.2 (s, C), 166.3 (s, C), 173.4 (s, C) ppm. IR (KBr): 2982, 1732, 1334, 1219, 1080, 1017, 759, 702, 528 cm<sup>-1</sup>. HRMS (ESI, *m/z*): Calcd for C<sub>33</sub>H<sub>33</sub>O<sub>6</sub> [M+H]<sup>+</sup>: 525.2272, found: 525.2275.

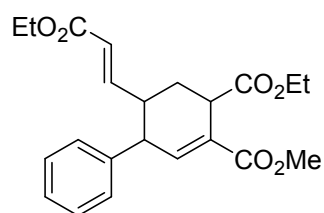

**4-Ethyl 3-methyl (*E*)-6-(3-ethoxy-3-oxoprop-1-en-1-yl)-1, 4, 5, 6-tetrahydro- [1, 1'-biphenyl]-3, 4-dicarboxylate **3d**.**

The reaction of diene (78.0 mg, 0.3 mmol, 1.0 equiv) and allenolate (56.8 mg, 0.45 mmol, 1.5 equiv), after a flash column chromatography (petroleum: AcOEt = 5:1) afforded the product **3d** (92.7 mg, 80% yield) and [3 + 2] adduct (9.2 mg, 8% yield).

Colorless oil. <sup>1</sup>H NMR (300 MHz, CDCl<sub>3</sub>) δ 1.21 – 1.28 (m, 6H, 2CH<sub>3</sub>), 1.81 – 1.89

(m, 1H, CH), 2.26 – 2.55 (m, 2H, CH<sub>2</sub>), 3.38 – 3.43 (m, 1H, CH), 3.60 – 3.64 (m, 1H, CH), 3.72 (s, 3H, COOCH<sub>3</sub>), 4.07 – 4.13 (m, 2H, COOCH<sub>2</sub>), 4.16 – 4.19 (m, 2H, COOCH<sub>2</sub>), 5.61 (d, *J* = 15.2 Hz, 1H, HC=C), 6.78 (dd, *J* = 15.7, 7.9 Hz, 1H, C=CH), 6.99 (t, *J* = 2.1 Hz, 1H, HC=C), 7.06 – 7.08 (m, 2H, ArH), 7.23 – 7.27 (m, 2H, ArH), 7.29 – 7.32 (m, 1H, ArH) ppm. <sup>13</sup>C NMR (75 MHz, CDCl<sub>3</sub>) δ 14.1 (s, 2CH<sub>3</sub>), 31.8 (s, CH<sub>2</sub>), 42.0 (s, CH), 43.4 (s, CH), 47.7 (s, CH), 51.8 (s, COOCH<sub>3</sub>), 60.3 (s, COOCH<sub>2</sub>), 61.0 (s, COOCH<sub>2</sub>), 122.3 (s, CH), 127.3 (s, CH), 128.2 (s, 2CH), 128.8 (s, C), 128.8 (s, 2CH), 141.2 (s, C), 143.0 (s, CH), 148.8 (s, CH), 166.0 (s, C), 166.7 (s, C), 173.8 (s, C) ppm. IR (KBr): 2982, 1727, 1697, 1280, 1119, 1041, 745, 700, 529 cm<sup>-1</sup>. HRMS (ESI, m/z): Calcd for C<sub>22</sub>H<sub>27</sub>O<sub>6</sub> [M+H]<sup>+</sup>: 387.1802, found: 387.1804.

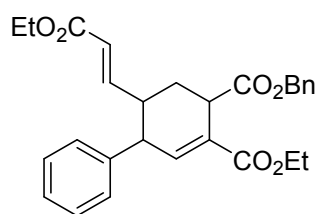

**4-Benzyl 3-ethyl (*E*)-6-(3-ethoxy-3-oxoprop-1-en-1-yl)-1, 4, 5, 6-tetrahydro- [1, 1'-biphenyl]-3, 4-dicarboxylate 3e.**

The reaction of diene (100.9 mg, 0.3 mmol, 1.0 equiv) and allenolate (56.8 mg, 0.45 mmol, 1.5 equiv), after a flash column chromatography (petroleum: AcOEt = 5:1) afforded the product **3e** (117.9 mg, 85% yield) and [3 + 2] adduct (4.2 mg, 3% yield).

Colorless oil. <sup>1</sup>H NMR (300 MHz, CDCl<sub>3</sub>) δ 1.17 – 1.26 (m, 6H, 2CH<sub>3</sub>), 1.85 (dd, *J* = 24.4, 11.9 Hz, 1H, CH<sub>2</sub>), 2.28 – 2.55 (m, 2H, CH<sub>2</sub>, CH), 3.39 – 3.44 (m, 1H, CH), 3.67 – 3.74 (m, 1H, CH), 4.09 – 4.16 (m, 4H, 2COOCH<sub>2</sub>), 5.17 (dd, *J* = 34.1, 12.3 Hz, 2H, COOCH<sub>2</sub>), 5.60 (d, *J* = 15.7 Hz, 1H, HC=C), 6.79 (dd, *J* = 15.7, 8.0 Hz, 1H, C=CH), 7.02 (t, *J* = 2.1 Hz, 1H, HC=C), 7.02 – 7.10 (m, 2H, ArH), 7.25 – 7.27 (m, 1H, ArH), 7.28 – 7.30 (m, 2H, ArH), 7.35 – 7.39 (m, 5H, ArH) ppm. <sup>13</sup>C NMR (75 MHz, CDCl<sub>3</sub>) δ 14.1 (s, CH<sub>3</sub>), 14.2 (s, CH<sub>3</sub>), 31.9 (s, CH<sub>2</sub>), 42.1 (s, CH), 43.5 (s, CH), 47.8 (s, CH), 60.4 (s, CH<sub>2</sub>, COOCH<sub>2</sub>), 60.9 (s, CH<sub>2</sub>, COOCH<sub>2</sub>), 66.8 (s, COOCH<sub>2</sub>), 122.3 (s, CH), 127.3 (s, CH), 128.2 (s, 2CH), 128.3 (s, 2CH), 128.3 (s, CH), 128.6 (s, 2CH), 128.8 (s, 2CH), 128.9 (s, C), 135.7 (s, C), 141.2 (s, C), 142.9 (s, CH), 148.7 (s, CH), 166.1 (s, C), 166.3 (s, C), 173.7 (s, C) ppm. IR (KBr): 2982, 1728, 1370, 1262,

1113, 1035, 753, 703, 523  $\text{cm}^{-1}$ . **HRMS** (ESI,  $m/z$ ): Calcd for  $\text{C}_{28}\text{H}_{31}\text{O}_6$   $[\text{M}+\text{H}]^+$ : 463.2115, found: 463.2117.

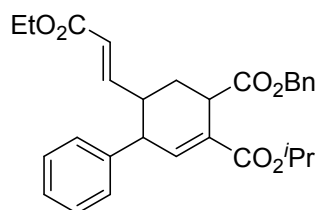

**4-Benzyl 3-isopropyl (*E*)-6-(3-ethoxy-3-oxoprop-1-en-1-yl)-1, 4, 5, 6-tetrahydro-[1, 1'-biphenyl]-3, 4-dicarboxylate **3f**.**

The reaction of diene (105.1 mg, 0.3 mmol, 1.0 equiv) and allenoate (56.8 mg, 0.45 mmol, 1.5 equiv), after a flash column chromatography (petroleum: AcOEt = 5:1) afforded the product **3f** (110.1 mg, 77% yield) and [3 + 2] adduct (4.3 mg, 3% yield).

Colorless oil.  $^1\text{H NMR}$  (300 MHz,  $\text{CDCl}_3$ )  $\delta$  1.18 – 1.24 (m, 9H, 3 $\text{CH}_3$ ), 1.85 (dd,  $J$  = 24.1, 11.9 Hz, 1H, CH), 2.29 – 2.34 (m, 1H, CH), 2.51 (dd,  $J$  = 19.0, 9.6 Hz, 1H, CH), 3.41 (d,  $J$  = 9.7 Hz, 1H, CH), 3.70 – 3.73 (m, 1H, CH), 4.13 (dd,  $J$  = 14.0, 6.9 Hz, 2H,  $\text{CO}_2\text{CH}_2$ ), 5.00 – 5.10 (m, 1H, CH), 5.16 (dd,  $J$  = 25.8, 12.3 Hz, 2H,  $\text{CO}_2\text{CH}_2\text{Ph}$ ), 5.60 (d,  $J$  = 15.7 Hz, 1H,  $\text{HC}=\text{C}$ ), 6.79 (dd,  $J$  = 15.7, 7.9 Hz, 1H,  $\text{C}=\text{CH}$ ), 7.00 – 7.04 (m, 1H,  $\text{HC}=\text{C}$ ), 7.08 – 7.11 (m, 2H, ArH), 7.27 – 7.37 (m, 8H, ArH) ppm.  $^{13}\text{C NMR}$  (75 MHz,  $\text{CDCl}_3$ )  $\delta$  14.2 (s,  $\text{CH}_3$ ), 21.7 (s,  $\text{CH}_3$ ), 21.8 (s,  $\text{CH}_3$ ), 31.9 (s,  $\text{CH}_2$ ), 42.1 (s, CH), 43.6 (s, CH), 47.8 (s, CH), 60.4 (s,  $\text{COOCH}_2$ ), 66.8 (s,  $\text{COOCH}_2\text{Ar}$ ), 68.5 (s,  $\text{COOCH}$ ), 122.3 (s, CH), 127.3 (s, CH), 128.2 (s, 2CH), 128.2 (s, 2CH), 128.3 (s, CH), 128.6 (s, 2CH), 128.8 (s, 2CH), 129.2 (s, C), 135.7 (s, C), 141.3 (s, C), 142.5 (s, CH), 148.8 (s, CH), 165.8 (s, C), 166.1 (s, C), 173.7 (s, C) ppm. **IR (KBr)**: 3029, 1727, 1371, 1261, 1110, 1034, 752, 704, 526  $\text{cm}^{-1}$ . **HRMS** (ESI,  $m/z$ ): Calcd for  $\text{C}_{29}\text{H}_{33}\text{O}_6$   $[\text{M}+\text{H}]^+$ : 477.2272, found: 477.2274.

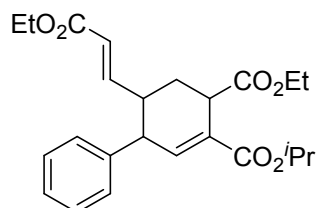

**4-Ethyl 3-isopropyl (*E*)-6-(3-ethoxy-3-oxoprop-1-en-1-yl)-1, 4, 5, 6-tetrahydro-[1, 1'-biphenyl]-3, 4-dicarboxylate **3g**.**

The reaction of diene (86.5 mg, 0.3 mmol, 1.0 equiv) and allenolate (56.8 mg, 0.45 mmol, 1.5 equiv), after a flash column chromatography (petroleum: AcOEt = 5:1) afforded the product **3g** (104.5 mg, 84% yield) and [3 + 2] adduct (10.0 mg, 8% yield). Colorless oil. **<sup>1</sup>H NMR (300 MHz, CDCl<sub>3</sub>)**  $\delta$  1.22 – 1.31 (m, 12H, 4CH<sub>3</sub>), 1.83 (dd,  $J$  = 24.1, 12.0 Hz, 1H, CH), 2.28 – 2.56 (m, 2H, CH<sub>2</sub>, CH), 3.40 – 3.43 (m, 1H, CH), 3.62 – 3.65 (m, 1H, CH), 4.09 – 4.21 (m, 4H, 2COOCH<sub>2</sub>), 5.03 – 5.11 (m, 1H, COOCH), 5.62 (d,  $J$  = 15.8 Hz, 1H, HC=C), 6.80 (dd,  $J$  = 15.7, 7.8 Hz, 1H, C=CH), 6.93 – 6.98 (m, 1H, HC=C), 7.09 – 7.11 (m, 2H, ArH), 7.28 – 7.35 (m, 3H, ArH) ppm. **<sup>13</sup>C NMR (75 MHz, CDCl<sub>3</sub>)**  $\delta$  14.1 (s, CH<sub>3</sub>), 14.2 (s, CH<sub>3</sub>), 21.7 (s, CH<sub>3</sub>), 21.8 (s, CH<sub>3</sub>), 32.0 (s, CH<sub>2</sub>), 42.1 (s, CH), 43.2 (s, CH), 47.8 (s, CH), 60.3 (s, COOCH<sub>2</sub>), 61.0 (s, COOCH<sub>2</sub>), 68.4 (s, COOCH), 122.2 (s, CH), 127.3 (s, CH), 128.2 (s, 2CH), 128.8 (s, 2CH), 129.4 (s, C), 141.4 (s, C), 142.3 (s, CH), 148.9 (s, CH), 165.8 (s, C), 166.1 (s, C), 173.9 (s, C) ppm. **IR (KBr):** 3007, 1732, 1371, 1255, 1117, 1033, 750, 705, 526 cm<sup>-1</sup>. **HRMS (ESI, m/z):** Calcd for C<sub>24</sub>H<sub>31</sub>O<sub>6</sub> [M+H]<sup>+</sup>: 415.2115, found: 415.2117.

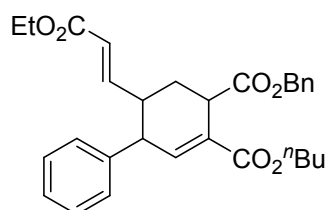

**4-Benzyl 3-butyl (E)-6-(3-ethoxy-3-oxoprop-1-en-1-yl)-1, 4, 5, 6-tetrahydro- [1, 1'-biphenyl]-3, 4-dicarboxylate **3h**.**

The reaction of diene (109.3 mg, 0.3 mmol, 1.0 equiv) and allenolate (56.8 mg, 0.45 mmol, 1.5 equiv), after a flash column chromatography (petroleum: AcOEt = 5:1) afforded the product **3h** (116.3 mg, 79% yield) and [3 + 2] (5.8 mg, 2% yield).

White solid. **MP:** 74 - 75 °C. **<sup>1</sup>H NMR (300 MHz, CDCl<sub>3</sub>)**  $\delta$  0.90 (t,  $J$  = 7.4 Hz, 3H, CH<sub>3</sub>), 1.24 (t,  $J$  = 7.1 Hz, 3H, CH<sub>3</sub>), 1.30 – 1.37 (m, 2H, CH<sub>2</sub>), 1.51 – 1.60 (m, 2H, CH<sub>2</sub>), 1.85 (dd,  $J$  = 24.3, 11.8 Hz, 1H, CH), 2.28 – 2.35 (m, 1H, CH), 2.45 – 2.55 (m, 1H, CH), 3.39 – 3.44 (m, 1H, CH), 3.67 – 3.75 (m, 1H, CH), 4.02 – 4.16 (m, 4H, 2COOCH<sub>2</sub>), 5.16 (dd,  $J$  = 36.3, 12.3 Hz, 2H, COOCH<sub>2</sub>Ph), 5.60 (d,  $J$  = 15.8 Hz, 1H, HC=C), 6.79 (dd,  $J$  = 15.7, 8.0 Hz, 1H, C=CH), 7.01 (t,  $J$  = 2.1 Hz, 1H, HC=C), 7.07 – 7.10 (m, 2H, ArH), 7.26 – 7.30 (m, 2H, ArH), 7.32 – 7.35 (m, 2H, ArH), 7.36 – 7.38



(m, 4H, ArH) ppm.  $^{13}\text{C}$  NMR (75 MHz,  $\text{CDCl}_3$ )  $\delta$  13.7 (s,  $\text{CH}_3$ ), 14.2 (s,  $\text{CH}_3$ ), 19.1 (s,  $\text{CH}_2$ ), 30.5 (s,  $\text{CH}_2$ ), 31.9 (s,  $\text{CH}_2$ ), 42.1 (s, CH), 43.6 (s, CH), 47.8 (s, CH), 60.4 (s,  $\text{CH}_2$ ), 64.8 (s,  $\text{CH}_2$ ), 66.8 (s,  $\text{CH}_2$ ), 122.3 (s, CH), 127.3 (s, CH), 128.2 (s, 2CH), 128.3 (s, CH), 128.3 (s, 2CH), 128.6 (s, 2CH), 128.8 (s, 2CH), 128.9 (s, C), 135.7 (s, C), 141.3 (s, C), 142.8 (s, CH), 148.7 (s, CH), 166.1 (s, C), 166.3 (s, C), 173.7 (s, C) ppm. IR (KBr): 3003, 1728, 1372, 1259, 1117, 1030, 751, 705, 527  $\text{cm}^{-1}$ . RMS (ESI,  $m/z$ ): Calcd for  $\text{C}_{30}\text{H}_{35}\text{O}_6$   $[\text{M}+\text{H}]^+$ : 491.2428, found: 491.2430.

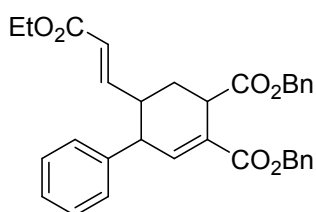

**Dibenzy l (*E*)-6-(3-ethoxy-3-oxoprop-1-en-1-yl)-1, 4, 5, 6-tetrahydro- [1, 1'-biphenyl]-3, 4-dicarboxylate **3i**.**

The reaction of diene (119.5 mg, 0.3 mmol, 1.0 equiv) and allenolate (56.8 mg, 0.45 mmol, 1.5 equiv), after a flash column chromatography (petroleum: AcOEt = 5:1) afforded the product **3i** (141.6 mg, 90% yield) and [3 + 2] adduct (3.2 mg, 2% yield).

Colorless oil.  $^1\text{H}$  NMR (300 MHz,  $\text{CDCl}_3$ )  $\delta$  1.24 (t,  $J = 7.1$  Hz, 3H,  $\text{CH}_3$ ), 1.80 – 1.92 (m, 1H, CH), 2.30 – 2.36 (m, 1H, CH), 2.51 (dd,  $J = 18.6, 8.8$  Hz, 1H, CH), 3.42 (d,  $J = 9.7$  Hz, 1H), 3.72 – 3.76 (m, 1H, CH), 4.13 (dd,  $J = 14.0, 6.9$  Hz, 2H,  $\text{COOCH}_2$ ), 4.98 – 5.18 (m, 4H,  $2\text{COOCH}_2\text{Ph}$ ), 5.60 (d,  $J = 15.8$  Hz, 1H,  $\text{HC}=\text{C}$ ), 6.79 (dd,  $J = 15.7, 8.0$  Hz, 1H,  $\text{C}=\text{CH}$ ), 7.07 – 7.09 (m, 3H,  $\text{HC}=\text{C}$ , ArH), 7.26 – 7.30 (m, 13H, ArH) ppm.  $^{13}\text{C}$  NMR (75 MHz,  $\text{CDCl}_3$ )  $\delta$  14.2 (s,  $\text{CH}_3$ ), 31.9 (s,  $\text{CH}_2$ ), 42.1 (s, CH), 43.5 (s, CH), 47.8 (s, CH), 60.4 (s,  $\text{COOCH}_2$ ), 66.6 (s,  $\text{COOCH}_2$ ), 66.8 (s,  $\text{COOCH}_2$ ), 122.4 (s, CH), 127.3 (s, CH), 128.2 (s, 2CH), 128.2 (s, CH), 128.2 (s, CH), 128.3 (s, 2CH), 128.3 (s, 2CH), 128.5 (s, 2CH), 128.5 (s, 2CH), 128.7 (s, C), 128.8 (s, 2CH), 135.7 (s, C), 135.7 (s, C), 141.1 (s, C), 143.5 (s, CH), 148.6 (s, CH), 166.1 (s, C), 166.1 (s, C), 173.6 (s, C) ppm. IR (KBr): 3002, 1715, 1362, 1221, 1165, 1005, 751, 700, 529  $\text{cm}^{-1}$ . HRMS (ESI,  $m/z$ ): Calcd for  $\text{C}_{33}\text{H}_{33}\text{O}_6$   $[\text{M}+\text{H}]^+$ : 525.2272, found: 525.2271.

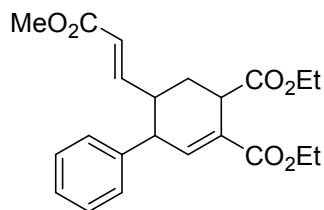

**Diethyl (*E*)-6-(3-methoxy-3-oxoprop-1-en-1-yl)-1, 4, 5, 6-tetrahydro- [1,1'-biphenyl]-3,4-dicarboxylate **3j**.**

The reaction of diene (82.3 mg, 0.3 mmol, 1.0 equiv) and allenoate (50.4 mg, 0.45 mmol, 1.5 equiv), after a flash column chromatography (petroleum: AcOEt = 5:1) afforded the product **3j** (99.7 mg, 86% yield) and [3 + 2] adduct (4.6 mg, 4% yield).

White solid. **MP**: 87 - 88 °C. **<sup>1</sup>H NMR (300 MHz, CDCl<sub>3</sub>)**  $\delta$  1.24 – 1.30 (m, 6H, 2CH<sub>3</sub>), 1.84 (q,  $J$  = 11.8 Hz, 1H, CH), 2.27 – 2.56 (m, 2H, CH<sub>2</sub>), 3.39 – 3.44 (m, 1H, CH), 3.60 – 3.64 (m, 1H, CH), 3.67 (s, 3H, COOCH<sub>3</sub>), 4.14 – 4.24 (m, 4H, 2COOCH<sub>2</sub>), 5.62 (d,  $J$  = 15.8 Hz, 1H, HC=C), 6.81 (dd,  $J$  = 15.8, 8.0 Hz, 1H, C=CH), 7.00 (t,  $J$  = 2.0 Hz, 1H, HC=C), 7.08 – 7.10 (m, 2H, ArH), 7.26 – 7.35 (m, 3H, ArH) ppm. **<sup>13</sup>C NMR (75 MHz, CDCl<sub>3</sub>)**  $\delta$  14.1 (s, 2CH<sub>3</sub>), 31.9 (s, CH<sub>2</sub>), 42.1 (s, CH), 43.6 (s, CH), 47.8 (s, CH), 51.5 (s, COOCH<sub>3</sub>), 60.9 (s, COOCH<sub>2</sub>), 61.0 (s, COOCH<sub>2</sub>), 121.7 (s, CH), 127.3 (s, CH), 128.2 (s, 2CH), 128.8 (s, 2CH), 129.1 (s, C), 141.3 (s, C), 142.6 (s, CH), 149.1 (s, CH), 166.3 (s, C), 166.5 (s, C), 173.9 (s, C) ppm. **IR (KBr)**: 3001, 1733, 1335, 1217, 1092, 1037, 779, 704, 528 cm<sup>-1</sup>. **HRMS (ESI, m/z)**: Calcd for C<sub>22</sub>H<sub>27</sub>O<sub>6</sub> [M+H]<sup>+</sup>: 387.1802, found: 387.1801.

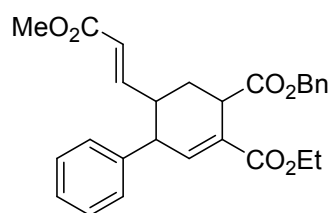

**4-Benzyl 3-ethyl (*E*)-6-(3-methoxy-3-oxoprop-1-en-1-yl)-1, 4, 5, 6-tetrahydro- [1,1'-biphenyl]-3,4-dicarboxylate **3k**.**

The reaction of diene (100.9 mg, 0.3 mmol, 1.0 equiv) and allenoate (50.4 mg, 0.45 mmol, 1.5 equiv), after a flash column chromatography (petroleum: AcOEt = 5:1) afforded the product **3k** (107.6 mg, 80% yield) and [3 + 2] adduct (4.0 mg, 3% yield).

White solid. **MP**: 70 - 71 °C. **<sup>1</sup>H NMR (300 MHz, CDCl<sub>3</sub>)**  $\delta$  1.20 (t,  $J$  = 7.1 Hz, 3H, CH<sub>3</sub>), 1.85 (q,  $J$  = 11.9 Hz, 1H, CH), 2.28 – 2.56 (m, 2H, CH<sub>2</sub>), 3.39 – 3.44 (m, 1H,

CH), 3.67 (s, 3H, COOCH<sub>3</sub>), 3.70 – 3.75 (m, 1H, CH), 4.21 – 4.06 (m, 2H, CO<sub>2</sub>CH<sub>2</sub>), 5.17 (q,  $J = 34.1, 12.3$  Hz, 2H, CO<sub>2</sub>CH<sub>2</sub>Ph), 5.60 (d,  $J = 16.1$  Hz, 1H, C=CH), 6.80 (dd,  $J = 15.7, 8.0$  Hz, 1H, C=CH), 7.02 (t,  $J = 2.0$  Hz, 1H, HC=C), 7.10 – 7.06 (m, 2H, ArH), 7.39 – 7.25 (m, 8H, ArH) ppm. <sup>13</sup>C NMR (75 MHz, CDCl<sub>3</sub>)  $\delta$  14.1 (s, CH<sub>3</sub>), 31.9 (s, CH<sub>2</sub>), 42.1 (s, CH), 43.6 (s, CH), 47.8 (s, CH), 51.5 (s, COOCH<sub>3</sub>), 60.9 (s, COOCH<sub>2</sub>), 66.8 (s, COOCH<sub>2</sub>Ph), 121.9 (s, CH), 127.3 (s, CH), 128.2 (s, 2CH), 128.3 (s, 2CH), 128.3 (s, CH), 128.6 (s, 2CH), 128.8 (s, 2CH), 128.9 (s, C), 135.8 (s, C), 141.2 (s, C), 142.8 (s, CH), 149.0 (s, CH), 166.2 (s, C), 166.5 (s, C), 173.7 (s, C) ppm. IR (KBr): 2960, 1714, 1699, 1283, 1119, 1038, 760, 700, 530 cm<sup>-1</sup>. HRMS (ESI, m/z): Calcd for C<sub>27</sub>H<sub>29</sub>O<sub>6</sub> [M+H]<sup>+</sup>: 449.1959, found: 449.1960.

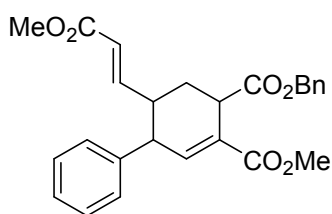

**4-Benzyl 3-methyl (*E*)-6-(3-methoxy-3-oxoprop-1-en-1-yl)-1, 4, 5, 6-tetrahydro-[1, 1'-biphenyl]-3, 4-dicarboxylate **3I**.**

The reaction of diene (97.3 mg, 0.3 mmol, 1.0 equiv) and allenolate (50.4 mg, 0.45 mmol, 1.5 equiv), after a flash column chromatography (petroleum: AcOEt = 5:1) afforded the product **3I** (93.8 mg, 72% yield) and [3 + 2] adduct (5.2 mg, 4% yield).

Colorless oil. <sup>1</sup>H NMR (300 MHz, CDCl<sub>3</sub>)  $\delta$  1.85 (q,  $J = 11.9$  Hz, 1H, CH), 2.28 – 2.56 (m, 2H, CH<sub>2</sub>), 3.39 – 3.44 (m, 1H, CH), 3.63 (s, 3H, COOCH<sub>3</sub>), 3.67 (s, 3H, COOCH<sub>3</sub>), 3.70 – 3.73 (m, 1H, CH), 5.18 (q,  $J = 12.2$  Hz, 2H, COOCH<sub>2</sub>Ph), 5.58 – 5.63 (m, 1H, CH=C), 6.80 (dd,  $J = 15.8, 8.0$  Hz, 1H, C=CH), 7.02 (t,  $J = 2.1$  Hz, 1H, CH=C), 7.06 – 7.09 (m, 2H, ArH), 7.21 – 7.26 (m, 1H, ArH), 7.28 – 7.34 (m, 3H, ArH), 7.36 – 7.39 (m, 4H, ArH) ppm. <sup>13</sup>C NMR (75 MHz, CDCl<sub>3</sub>)  $\delta$  31.9 (s, CH<sub>2</sub>), 42.1 (s, CH), 43.5 (s, CH), 47.8 (s, CH), 51.6 (s, COOCH<sub>3</sub>), 51.9 (s, COOCH<sub>3</sub>), 66.8 (s, COOCH<sub>2</sub>Ph), 122.0 (s, CH), 127.4 (s, CH), 128.2 (s, 2CH), 128.3 (s, CH), 128.4 (s, 2CH), 128.6 (s, 2CH), 128.6 (s, C), 128.8 (s, 2CH), 135.8 (s, C), 141.1 (s, C), 143.2 (s, CH), 149.0 (s, CH), 166.5 (s, C), 166.6 (s, C), 173.6 (s, C) ppm. IR (KBr): 2993, 1715, 1699, 1284, 1109, 1035, 760, 702, 533 cm<sup>-1</sup>. HRMS (ESI, m/z): Calcd for

C<sub>26</sub>H<sub>27</sub>O<sub>6</sub> [M+H]<sup>+</sup>: 435.1802, found: 435.1804.

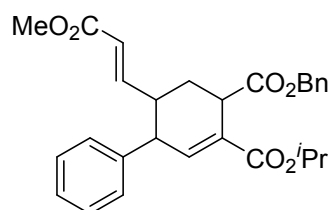

**4-Benzyl 3-isopropyl (E)-6-(3-methoxy-3-oxoprop-1-en-1-yl)-1, 4, 5, 6-tetrahydro- [1, 1'-biphenyl]-3, 4-dicarboxylate 3m.**

The reaction of diene (105.1 mg, 0.3 mmol, 1.0 equiv) and allenoate (50.4 mg, 0.45 mmol, 1.5 equiv), after a flash column chromatography (petroleum: AcOEt = 5:1) afforded the product **3m** (110.0 mg, 80% yield) and [3+2] adduct (6.9 mg, 5% yield).

White solid. **MP:** 78 - 79 °C. **<sup>1</sup>H NMR (300 MHz, CDCl<sub>3</sub>)** δ 1.18 – 1.24 (m, 6H, 2CH<sub>3</sub>), 1.77 – 1.91 (m, 1H, CH), 2.28 – 2.35 (m, 1H, CH), 2.47 – 2.56 (m, 1H, CH), 3.39 – 3.43 (m, 1H, CH), 3.66 (s, 3H, COOCH<sub>3</sub>), 3.70– 3.74 (m, 1H, CH), 5.00 – 5.08 (m, 1H, COOCH), 5.11 – 5.23 (m, 2H, COOCH<sub>2</sub>Ph), 5.52 – 5.66 (m, 1H, CH=C), 6.80 (dd, *J* = 15.7, 8.0 Hz, 1H, C=CH), 6.95 – 7.03 (m, 1H, CH=C), 7.08 – 7.10 (m, 2H, ArH), 7.26 – 7.37 (m, 8H, ArH) ppm. **<sup>13</sup>C NMR (75 MHz, CDCl<sub>3</sub>)** δ 21.7(s, CH<sub>3</sub>), 21.8 (s, CH<sub>3</sub>), 31.9 (s, CH<sub>2</sub>), 42.1 (s, CH), 43.6 (s, CH), 47.8 (s, CH), 51.5 (s, COOCH<sub>3</sub>), 66.8 (s, COOCH<sub>2</sub>Ph), 68.5 (s, COOCH), 121.9 (s, CH), 127.3 (s, CH), 128.2 (s, 2CH), 128.2 (s, 2CH), 128.2 (s, CH), 128.3 (s, CH), 128.6(s, 2CH), 128.8 (s, 2CH), 129.2 (s, C), 135.7 (s, C), 141.3 (s, C), 142.5 (s, CH), 149.1 (s, CH), 165.8 (s, C), 166.5 (s, C), 173.7 (s, C) ppm. **IR (KBr):** 3003, 1715, 1361, 1221, 1165, 1005, 735, 703, 530 cm<sup>-1</sup>. **HRMS (ESI, m/z):** Calcd for C<sub>28</sub>H<sub>31</sub>O<sub>6</sub> [M+H]<sup>+</sup>: 463.2115, found: 463.2116.

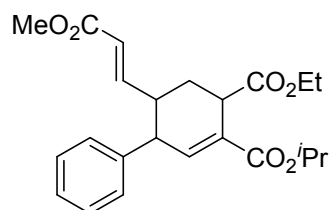

**4-Ethyl 3-isopropyl (E)-6-(3-methoxy-3-oxoprop-1-en-1-yl)-1, 4, 5, 6-tetrahydro- [1, 1'-biphenyl]-3, 4-dicarboxylate 3n.**

The reaction of diene (86.5 mg, 0.3 mmol, 1.0 equiv) and allenoate (50.4 mg, 0.45 mmol, 1.5 equiv), after a flash column chromatography (petroleum: AcOEt = 5:1)

afforded the product **3n** (102.1mg, 85% yield) and [3 + 2] adduct (8.4 mg, 7% yield). White solid. **MP**: 94 - 95 °C. **<sup>1</sup>H NMR (300 MHz, CDCl<sub>3</sub>)** δ 1.22 – 1.30 (m, 9H, 3CH<sub>3</sub>), 1.77 – 1.89 (m, 1H, CH), 2.26 – 2.55 (m, 2H), 3.40 (d, *J* = 9.6 Hz, 1H, CH), 3.57 – 3.61 (m, 1H, CH), 3.66 (s, 3H, COOCH<sub>3</sub>), 4.17 (q, *J* = 7.1 Hz, 2H, COOCH<sub>2</sub>), 5.02 – 5.10 (m, 1H, COOCH), 5.61 (d, *J* = 15.7 Hz, 1H, CH=C), 6.80 (dd, *J* = 15.7, 8.0 Hz, 1H, C=CH), 6.92 – 7.01 (m, 1H, CH=C), 7.08 – 7.10 (m, 2H, ArH), 7.25 – 7.34 (m, 3H, ArH) ppm. **<sup>13</sup>C NMR (75 MHz, CDCl<sub>3</sub>)** δ 14.1 (s, CH<sub>3</sub>), 21.7 (s, CH<sub>3</sub>), 21.8 (s, CH<sub>3</sub>), 32.0 (s, CH<sub>2</sub>), 42.1 (s, CH), 43.6 (s, CH), 47.8 (s, CH), 51.5 (s, COOCH<sub>3</sub>), 61.0 (s, COOCH<sub>2</sub>Ph), 68.4 (s, COOCH), 121.8 (s, CH), 127.3 (s, CH), 128.2 (s, 2CH), 128.8 (s, 2CH), 129.4 (s, C), 141.3 (s, C), 142.3 (s, CH), 149.2 (s, CH), 165.8 (s, C), 166.5 (s, C), 173.9 (s, C) ppm. **IR (KBr)**: 2981, 1716, 1372, 1267, 1178, 1002, 752, 702, 530 cm<sup>-1</sup>. **HRMS (ESI, m/z)**: Calcd for C<sub>23</sub>H<sub>29</sub>O<sub>6</sub> [M+H]<sup>+</sup>: 401.1959, found: 401.1960.

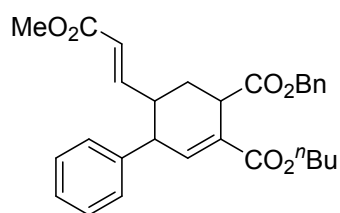

**4-Benzyl 3-butyl (E)-6-(3-methoxy-3-oxoprop-1-en-1-yl)-1, 4, 5, 6-tetrahydro-[1, 1'-biphenyl]-3, 4-dicarboxylate **3o**.**

The reaction of diene (109.3 mg, 0.3 mmol, 1.0 equiv) and allenolate (50.4 mg, 0.45 mmol, 1.5 equiv), after a flash column chromatography (petroleum: AcOEt = 5:1) afforded the product **3o** (98.6 mg, 69% yield) and [3 + 2] adduct (11.5 mg, 8% yield). Colorless oil. **<sup>1</sup>H NMR (300 MHz, CDCl<sub>3</sub>)** δ 0.91 (t, *J* = 7.3 Hz, 3H, CH<sub>3</sub>), 1.28 – 1.38 (m, 2H, CH<sub>2</sub>), 1.51 – 1.60 (m, 2H, CH<sub>2</sub>), 1.85 (q, *J* = 12.0 Hz, 1H, CH), 2.29 – 2.34 (m, 1H, CH), 2.51 (q, *J* = 9.0 Hz, 1H, CH), 3.40 – 3.43 (m, 1H, CH), 3.67 (s, 3H, COOCH<sub>3</sub>), 3.70– 3.73 (m, 1H, CH), 3.99 – 4.16 (m, 2H, COOCH<sub>2</sub>), 5.17 (q, *J* = 12.3 Hz, 2H, COOCH<sub>2</sub>Ph), 5.60 (d, *J* = 15.7 Hz, 1H, CH=C), 6.80 (dd, *J* = 15.7, 8.1 Hz, 1H, C=CH), 7.02 – 7.10 (m, 3H, CH=C, ArH), 7.26 – 7.37 (m, 8H, ArH) ppm. **<sup>13</sup>C NMR (75 MHz, CDCl<sub>3</sub>)** δ 13.7 (s, CH<sub>3</sub>), 19.1 (s, CH<sub>2</sub>), 30.5 (s, CH<sub>2</sub>), 31.9 (s, CH), 42.1 (s, CH), 43.7 (s, CH), 47.8 (s, CH), 51.6 (s, COOCH<sub>3</sub>), 64.8 (s, COOCH<sub>2</sub>), 66.8

(s, COOCH<sub>2</sub>Ph), 121.9 (s, CH), 127.3 (s, CH), 128.2 (s, 2CH), 128.3 (s, CH), 128.3 (s, 2CH), 128.6 (s, 2CH), 128.8 (s, 2CH), 128.9 (s, C), 135.7 (s, C), 141.2 (s, C), 142.8 (s, CH), 149.0 (s, CH), 166.3 (s, C), 166.5 (s, C), 173.7 (s, C) ppm. **IR (KBr)**: 3029, 1727, 1379, 1270, 1163, 1032, 733, 700, 520 cm<sup>-1</sup>. **HRMS (ESI, m/z)**: Calcd for C<sub>29</sub>H<sub>33</sub>O<sub>6</sub> [M+H]<sup>+</sup>: 477.2272, found: 477.2273.

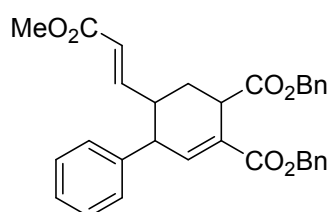

**Dibenzyl 6-(3-methoxy-3-oxoprop-1-en-1-yl)-1, 4, 5, 6-tetrahydro- [1, 1'-biphenyl]-3, 4-dicarboxylate 3p.**

The reaction of diene (119.5 mg, 0.3 mmol, 1.0 equiv) and allenolate (50.4 mg, 0.45 mmol, 1.5 equiv), after a flash column chromatography (petroleum: AcOEt = 5:1) afforded the product **3p** (85.7 mg, 56% yield) and [3 + 2] adduct (6.1 mg, 4% yield).

Colorless oil. **<sup>1</sup>H NMR (300 MHz, CDCl<sub>3</sub>)** δ 1.87 (q, *J* = 12.0 Hz, 1H, CH), 2.29 – 2.56 (m, 2H, CH<sub>2</sub>), 3.41 – 3.44 (m, 1H, CH), 3.68 (s, 3H, CH<sub>3</sub>), 3.72 – 3.77 (m, 1H, CH), 4.99 – 5.14 (m, 4H, 2COOCH<sub>2</sub>), 5.61 (d, *J* = 15.7 Hz, 1H, HC=C), 6.80 (dd, *J* = 15.7, 8.0 Hz, 1H, C=CH), 7.08 – 7.09 (m, 3H, HC=C, ArH), 7.30 – 7.35 (m, 13H, ArH) ppm. **<sup>13</sup>C NMR (75 MHz, CDCl<sub>3</sub>)** δ 31.9 (s, CH<sub>2</sub>), 42.1 (s, CH), 43.6 (s, CH), 47.8 (s, CH), 51.6 (s, COOCH<sub>3</sub>), 66.7 (s, COOCH<sub>2</sub>), 66.8 (s, COOCH<sub>2</sub>), 122.0 (s, CH), 127.4 (s, CH), 128.2 (s, 2CH), 128.3 (s, CH), 128.3(s, 2CH), 128.3 (s, 2CH), 128.5 (s, 2CH), 128.6 (s, 2CH), 128.7 (s, C), 128.9 (s, 2CH), 135.7(s, C), 135.7 (s, C), 141.1 (s, C), 143.5 (s, CH), 149.0 (s, CH), 166.0 (s, C), 166.5 (s, C), 173.6 (s, C) ppm. **IR (KBr)**: 2982, 1733, 1433, 1269, 1170, 1009, 732, 704, 541 cm<sup>-1</sup>. **HRMS (ESI, m/z)**: Calcd for C<sub>32</sub>H<sub>30</sub>O<sub>6</sub>Na [M+Na]<sup>+</sup>: 533.1935, found: 533.1934.

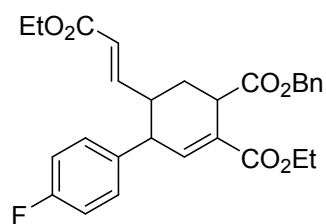

**4-Benzyl 3-ethyl 6-(3-ethoxy-3-oxoprop-1-en-1-yl)-4'-fluoro-1, 4, 5, 6-tetrahydro-[1, 1'-biphenyl]-3, 4-dicarboxylate 3q.**

The reaction of diene (106.3 mg, 0.3 mmol, 1.0 equiv) and allenolate (56.8 mg, 0.45 mmol, 1.5 equiv), after a flash column chromatography (petroleum: AcOEt = 5:1) afforded the product **3q** (113.8 mg, 79% yield) and [3 + 2] adduct (11.5 mg, 8% yield).

Colorless oil.  $^1\text{H NMR}$  (300 MHz,  $\text{CDCl}_3$ )  $\delta$  1.17 – 1.26 (m, 6H, 2 $\text{CH}_3$ ), 1.76 – 1.90(m, 1H, CH), 2.28 – 2.49(m, 2H,  $\text{CH}_2$ ), 3.38 – 3.43 (m, 1H, CH), 3.66 – 3.74 (m, 1H, CH), 4.05 – 4.18 (m, 4H, 2 $\text{COOCH}_2$ ), 5.16 (q,  $J = 12.3$  Hz, 2H,  $\text{COOCH}_2\text{Ph}$ ), 5.59 (d,  $J = 15.7$  Hz, 1H,  $\text{HC}=\text{C}$ ), 6.76 (dd,  $J = 15.7, 8.1$  Hz, 1H,  $\text{C}=\text{CH}$ ), 6.97 – 7.05 (m, 5H,  $\text{HC}=\text{C}$ , ArH), 7.33 – 7.38 (m, 5H, ArH) ppm.  $^{13}\text{C NMR}$  (75 MHz,  $\text{CDCl}_3$ )  $\delta$  14.1 (s,  $\text{CH}_3$ ), 14.2 (s,  $\text{CH}_3$ ), 31.9 (s,  $\text{CH}_2$ ), 42.1 (s, CH), 43.8 (s, CH), 47.0 (s, CH), 60.4 (s,  $\text{COOCH}_2$ ), 61.0 (s,  $\text{COOCH}_2$ ), 66.8 (s,  $\text{COOCH}_2\text{Ph}$ ), 115.7 (d,  $J = 21.4$  Hz, 2CH), 122.6 (s, CH), 128.3 (s, CH), 128.3 (s, 2CH), 128.6 (s, 2CH), 129.1 (s, C), 129.7 (d,  $J = 8.0$  Hz, 2CH), 135.7 (s, C), 137.0 (d,  $J = 3.2$  Hz, C), 142.5 (s, CH), 148.4 (s, CH), 161.9 (d,  $J = 245.8$  Hz, C), 166.0 (s, C), 166.1 (s, C), 173.6 (s, C) ppm. **IR** (KBr): 2987, 1733, 1433, 1269, 1184, 1003, 735, 708, 541  $\text{cm}^{-1}$ . **HRMS** (ESI,  $m/z$ ): Calcd for  $\text{C}_{28}\text{H}_{30}\text{FO}_6$  [ $\text{M}+\text{H}$ ] $^+$ : 481.2021, found: 481.2022.

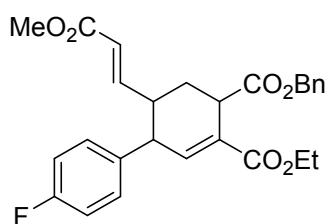

**4-Benzyl 3-ethyl 6-(3-methoxy-3-oxoprop-1-en-1-yl)-1, 4, 5, 6-tetrahydro-[1, 1'-biphenyl]-3, 4-dicarboxylate 3r.**

The reaction of diene (106.3 mg, 0.3 mmol, 1.0 equiv) and allenolate (50.4 mg, 0.45 mmol, 1.5 equiv), after a flash column chromatography (petroleum: AcOEt = 5:1) afforded the product **3r** (123.2 mg, 88% yield) and [3 + 2] adduct (4.2 mg, 3% yield).

Colorless oil.  $^1\text{H NMR}$  (300 MHz,  $\text{CDCl}_3$ )  $\delta$  1.20 (t,  $J = 7.1$  Hz, 3H,  $\text{CH}_3$ ), 1.84 (q,  $J = 12.0$  Hz, 1H, CH), 2.27 – 2.50 (m, 2H,  $\text{CH}_2$ ), 3.38 – 3.43 (m, 1H, CH), 3.67 (s, 3H,  $\text{COOCH}_3$ ), 3.72 – 3.81 (m, 1H, CH), 4.06 – 4.19 (m, 2H,  $\text{COOCH}_2$ ), 5.16 (q,  $J = 12.3$  Hz, 2H,  $\text{COOCH}_2\text{Ph}$ ), 5.59 (d,  $J = 15.7$  Hz, 1H,  $\text{HC}=\text{C}$ ), 6.76 (dd,  $J = 15.7, 8.2$  Hz,

1H, C=CH), 6.97 – 7.07 (m, 5H, HC=C, ArH), 7.32 – 7.37 (m, 5H, ArH) ppm. <sup>13</sup>C NMR (75 MHz, CDCl<sub>3</sub>) δ 14.1 (s, CH<sub>3</sub>), 31.9 (s, CH<sub>2</sub>), 42.1 (s, CH), 43.9 (s, CH), 47.0 (s, CH), 51.6 (s, CH<sub>3</sub>), 61.0 (s, COOCH<sub>2</sub>), 66.8 (s, COOCH<sub>2</sub>Ph), 115.7 (d, *J* = 21.4 Hz, 2CH), 122.2 (s, CH), 128.3 (s, 2CH), 128.3 (s, CH), 128.6 (s, 2CH), 129.1 (s, C), 129.7 (d, *J* = 8.0 Hz, 2CH), 135.7 (s, C), 137.0 (d, *J* = 3.2 Hz, C), 142.4 (s, CH), 148.7 (s, CH), 161.9 (d, *J* = 246.0 Hz, C), 166.1 (s, C), 166.4 (s, C), 173.5 (s, C) ppm. IR (KBr): 2951, 1731, 1435, 1270, 1184, 1008, 732, 708, 542 cm<sup>-1</sup>. HRMS (ESI, *m/z*): Calcd for C<sub>27</sub>H<sub>28</sub>FO<sub>6</sub> [M+H]<sup>+</sup>: 467.1864, found: 467.1866.

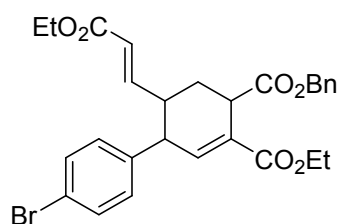

**4-Benzyl 3-ethyl (*E*)-4'-bromo-6-(3-ethoxy-3-oxoprop-1-en-1-yl)-1, 4, 5, 6-tetrahydro-[1, 1'-biphenyl]-3,4-dicarboxylate 3s.**

The reaction of diene (124.6 mg, 0.3 mmol, 1.0 equiv) and allenolate (56.8 mg, 0.45 mmol, 1.5 equiv), after a flash column chromatography (petroleum: AcOEt = 5:1) afforded the product **3s** (123.4 mg, 76% yield) and [3 + 2] adduct (9.2 mg, 6% yield).

Colorless oil. <sup>1</sup>H NMR (300 MHz, CDCl<sub>3</sub>) δ 1.20 – 1.25 (m, 6H, 2CH<sub>3</sub>), 1.78 – 1.97 (m, 1H, CH), 2.19 – 2.46 (m, 2H, CH<sub>2</sub>), 3.30 – 3.40 (m, 1H, CH), 3.57 – 3.76 (m, 1H, CH), 3.99 – 4.28 (m, 4H, 2COOCH<sub>2</sub>), 5.16 (dd, *J* = 33.4, 12.0 Hz, 2H, COOCH<sub>2</sub>Ph), 5.52 – 5.71 (m, 1H, HC=C), 6.75 (dd, *J* = 15.2, 7.8 Hz, 1H, C=CH), 6.95 – 7.05 (m, 3H, HC=C, ArH), 7.28 – 7.45 (m, 7H, ArH) ppm. <sup>13</sup>C NMR (75 MHz, CDCl<sub>3</sub>) δ 14.1 (s, CH<sub>3</sub>), 14.2 (s, CH<sub>3</sub>), 31.9 (s, CH<sub>2</sub>), 42.0 (s, CH), 43.6 (s, CH), 47.2 (s, CH), 60.5 (s, COOCH<sub>2</sub>), 61.0 (s, COOCH<sub>2</sub>Ph), 66.8 (s, COOCH<sub>2</sub>Ph), 121.2 (s, C), 122.7 (s, CH), 128.31 (s, 2CH), 128.32 (s, CH), 128.6 (s, 2CH), 129.3 (s, C), 129.9 (s, 2CH), 131.9 (s, 2CH), 135.7 (s, C), 140.3 (s, C), 142.0 (s, CH), 148.2 (s, CH), 166.0 (s, C), 166.1 (s, C), 173.5 (s, C) ppm. IR (KBr): 2980, 1715, 1368, 1267, 1094, 1033, 751, 698, 519 cm<sup>-1</sup>. HRMS (ESI, *m/z*): Calcd for C<sub>28</sub>H<sub>30</sub>BrO<sub>6</sub> [M+H]<sup>+</sup>: 541.1220, found: 541.1218.



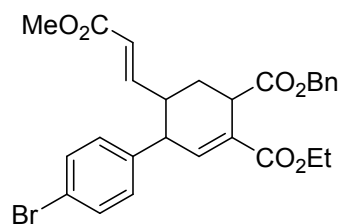

**4-Benzyl 3-ethyl (*E*)-4'-bromo-6-(3-methoxy-3-oxoprop-1-en-1-yl)-1, 4, 5, 6-tetrahydro-[1,1'-biphenyl]-3, 4-dicarboxylate **3t**.**

The reaction of diene (124.6 mg, 0.3 mmol, 1.0 equiv) and allenoate (50.4 mg, 0.45 mmol, 1.5 equiv), after a flash column chromatography (petroleum: AcOEt = 5:1) afforded the product **3t** (120.2 mg, 76% yield) and [3 + 2] adduct (11.0 mg, 7% yield). Colorless oil.  $^1\text{H NMR}$  (300 MHz,  $\text{CDCl}_3$ )  $\delta$  1.20 (t,  $J = 7.1$  Hz, 6H, 2 $\text{CH}_3$ ), 1.77 – 1.89 (m, 1H, CH), 2.18 – 2.50 (m, 2H,  $\text{CH}_2$ ), 3.35 – 3.41 (m, 1H, CH), 3.66 – 3.73 (m, 4H, CH,  $\text{COOCH}_3$ ), 4.05 – 4.18 (m, 2H,  $\text{COOCH}_2$ ), 5.16 (q,  $J = 12.3$  Hz, 2H,  $\text{COOCH}_2\text{Ph}$ ), 5.57– 5.63 (m, 1H,  $\text{CH}=\text{C}$ ), 6.75 (dd,  $J = 15.7, 8.2$  Hz, 1H,  $\text{C}=\text{CH}$ ), 6.94 – 6.97 (m, 3H,  $\text{CH}=\text{C}$ , ArH), 7.33 – 7.39 (m, 5H, ArH), 7.42 – 7.45 (m, 2H, ArH) ppm.  $^{13}\text{C NMR}$  (75 MHz,  $\text{CDCl}_3$ )  $\delta$  14.1 (s,  $\text{CH}_3$ ), 31.9 (s,  $\text{CH}_2$ ), 42.0 (s, CH), 43.7 (s, CH), 47.2 (s, CH), 51.6 (s,  $\text{COOCH}_3$ ), 61.0 (s,  $\text{COOCH}_2$ ), 66.8 (s,  $\text{COOCH}_2\text{Ph}$ ), 121.3 (s, C), 122.3 (s, CH), 128.30 (s, 2CH), 128.33 (s, CH), 128.6 (s, 2CH), 129.4 (s, C), 129.9 (s, 2CH), 132.0 (s, 2CH), 135.7 (s, C), 140.2 (s, C), 141.9 (s, CH), 148.5 (s, CH), 166.1 (s, C), 166.4 (s, C), 173.5 (s, C) ppm. IR (KBr): 2932, 1727, 1384, 1280, 1119, 1041, 745, 697, 533  $\text{cm}^{-1}$ . HRMS (ESI,  $m/z$ ): Calcd for  $\text{C}_{27}\text{H}_{28}\text{BrO}_6$  [ $\text{M}+\text{H}$ ] $^+$ : 527.1064, found: 527.1063.

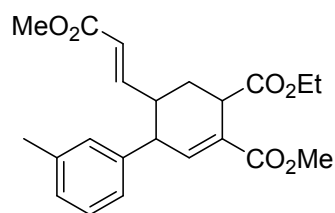

**4-Ethyl 3-methyl (*E*)-6-(3-methoxy-3-oxoprop-1-en-1-yl)-3'-methyl-1, 4, 5, 6-tetrahydro-[1,1'-biphenyl]-3, 4-dicarboxylate **3u**.**

The reaction of diene (82.3 mg, 0.3 mmol, 1.0 equiv) and allenoate (50.4 mg, 0.45 mmol, 1.5 equiv), after a flash column chromatography (petroleum: AcOEt = 5:1) afforded the product **3u** (99.7 mg, 86% yield) and [3 + 2] adduct (2.3 mg, 3% yield). Colorless oil.  $^1\text{H NMR}$  (300 MHz,  $\text{CDCl}_3$ )  $\delta$  1.25 – 1.29 (m, 3H,  $\text{CH}_3$ ), 1.76 – 1.88

(m, 1H, CH), 2.28 – 2.32 (m, 4H, CH, CH<sub>3</sub>), 2.47 – 2.56 (m, 1H, CH), 3.37 (d,  $J = 9.7$  Hz, 1H, CH), 3.56 – 3.61 (m, 1H, CH), 3.67 (s, 3H, COOCH<sub>3</sub>), 3.73 (s, 3H, COOCH<sub>3</sub>), 4.14 – 4.23 (m, 2H, COOCH<sub>2</sub>), 5.64 (d,  $J = 15.8$  Hz, 1H, CH=C), 6.81 (dd,  $J = 15.8, 7.9$  Hz, 1H, C=CH), 6.88 – 6.99 (m, 3H, CH=C, ArH), 7.04 – 7.07 (m, 1H, ArH), 7.16 – 7.21 (m, 1H, ArH) ppm. <sup>13</sup>C NMR (75 MHz, CDCl<sub>3</sub>)  $\delta$  14.2 (s, CH<sub>3</sub>), 21.4 (s, CH<sub>3</sub>), 31.9 (s, CH<sub>2</sub>), 42.0 (s, CH), 43.3 (s, CH), 47.7 (s, CH), 51.5 (s, COOCH<sub>3</sub>), 51.9 (s, COOCH<sub>3</sub>), 61.0 (s, COOCH<sub>2</sub>), 121.8 (s, CH), 125.3 (s, CH), 128.1 (s, CH), 128.6 (s, C), 128.7 (s, CH), 128.7 (s, CH), 138.5 (s, C), 141.1 (s, C), 143.2 (s, CH), 149.2 (s, CH), 166.5 (s, C), 166.8 (s, C), 173.9 (s, C) ppm. IR (KBr): 2980, 1731, 1435, 1270, 1184, 1036, 732, 708, 542 cm<sup>-1</sup>. HRMS (ESI, m/z): Calcd for C<sub>22</sub>H<sub>27</sub>O<sub>6</sub> [M+H]<sup>+</sup>: 387.1802, found: 387.1801.

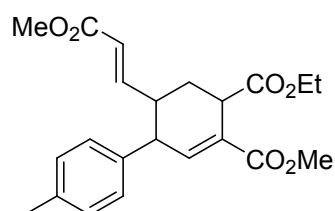

**4-Ethyl 3-methyl (*E*)-6-(3-methoxy-3-oxoprop-1-en-1-yl)-4'-methyl-1, 4, 5, 6-tetrahydro-[1,1'-biphenyl]-3,4-dicarboxylate **3v**.**

The reaction of diene (82.3 mg, 0.3 mmol, 1.0 equiv) and allenolate (50.4 mg, 0.45 mmol, 1.5 equiv), after a flash column chromatography (petroleum: AcOEt = 5:1) afforded the product **3v** (90.4 mg, 78% yield).

Colorless oil. <sup>1</sup>H NMR (300 MHz, CDCl<sub>3</sub>)  $\delta$  1.27 (t,  $J = 7.1$  Hz, 3H, CH<sub>3</sub>), 1.82 (q,  $J = 12.0$  Hz, 1H, CH), 2.26 – 2.29 (m, 1H, CH), 2.32 (s, 3H, CH<sub>3</sub>), 2.45 – 2.54 (m, 1H, CH), 3.36 – 3.39 (m, 1H, CH), 3.60 – 3.64 (m, 1H, CH), 3.67 (s, 3H, COOCH<sub>3</sub>), 3.73 (s, 3H, COOCH<sub>3</sub>), 4.14 – 4.23 (m, 2H, COOCH<sub>2</sub>), 5.63 (d,  $J = 15.8$  Hz, 1H, HC=C), 6.80 (dd,  $J = 15.8, 7.9$  Hz, 1H, C=CH), 6.95 – 6.99 (m, 3H, CH=C, ArH), 7.10 – 7.13 (m, 2H, ArH) ppm. <sup>13</sup>C NMR (75 MHz, CDCl<sub>3</sub>)  $\delta$  14.2 (s, CH<sub>3</sub>), 21.0 (s, CH<sub>3</sub>), 31.9 (s, CH<sub>2</sub>), 42.0 (s, CH), 43.4 (s, CH), 47.4 (s, CH), 51.5 (s, COOCH<sub>3</sub>), 51.9 (s, COOCH<sub>3</sub>), 61.0 (s, COOCH<sub>2</sub>), 121.8 (s, CH), 128.0 (s, 2CH), 128.6 (s, C), 129.5 (s, 2CH), 136.9 (s, C), 138.1 (s, C), 143.4 (s, CH), 149.3 (s, CH), 166.5 (s, C), 166.8 (s, C), 173.9 (s, C) ppm. IR (KBr): 2957, 1723, 1434, 1260, 1161, 1032, 732, 705, 541

cm<sup>-1</sup>. **HRMS** (ESI, m/z): Calcd for C<sub>22</sub>H<sub>27</sub>O<sub>6</sub> [M+H]<sup>+</sup>: 387.1802, found: 387.1803.

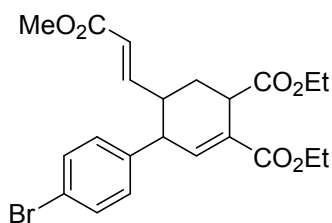

**Diethyl (*E*)-4'-bromo-6-(3-methoxy-3-oxoprop-1-en-1-yl)-1,4,5,6-tetrahydro-[1,1'-biphenyl]-3,4-dicarboxylate **3w**.**

The reaction of diene (124.6 mg, 0.3 mmol, 1.0 equiv) and allenoate (50.4 mg, 0.45 mmol, 1.5 equiv), after a flash column chromatography (petroleum: AcOEt = 5:1) afforded the product **3w** (113.1 mg, 81% yield) and [3 + 2] adduct (12.6 mg, 9% yield).

Colorless oil. **<sup>1</sup>H NMR (300 MHz, CDCl<sub>3</sub>)** δ 1.24 – 1.29 (m, 3H, CH<sub>3</sub>), 1.82 (q, *J* = 12.0 Hz, 1H, CH), 2.26 – 2.50 (m, 2H, CH<sub>2</sub>), 3.37 – 3.41 (m, 1H, CH), 3.60 – 3.64 (m, 1H, CH), 3.68 (s, 3H, COOCH<sub>3</sub>), 4.12 – 4.25 (m, 4H, 2COOCH<sub>2</sub>), 5.62 (d, *J* = 15.7 Hz, 1H, HC=C), 6.76 (dd, *J* = 15.7, 8.2 Hz, 1H, C=CH), 6.93 – 6.98 (m, 3H, HC=C, ArH), 7.39 – 7.45 (m, 2H, ArH) ppm. **<sup>13</sup>C NMR (75 MHz, CDCl<sub>3</sub>)** δ 14.1 (s, 2CH<sub>3</sub>), 31.9 (s, CH<sub>2</sub>), 42.0 (s, CH), 43.6 (s, CH), 47.2 (s, CH), 51.6 (s, COOCH<sub>3</sub>), 61.0 (s, COOCH<sub>2</sub>), 61.1 (s, COOCH<sub>2</sub>), 121.2 (s, C), 122.2 (s, CH), 129.5 (s, C), 129.9 (s, 2CH), 132.0 (s, 2CH), 140.3 (s, C), 141.8 (s, CH), 148.6 (s, CH), 166.1 (s, C), 166.4 (s, C), 173.7 (s, C) ppm. **IR (KBr):** ν = 2951, 1731, 1435, 1270, 1184, 1008, 732, 708, 542 cm<sup>-1</sup>. **HRMS** (ESI, m/z): Calcd for C<sub>22</sub>H<sub>26</sub>BrO<sub>6</sub> [M+H]<sup>+</sup>: 465.0907, found: 465.0906.

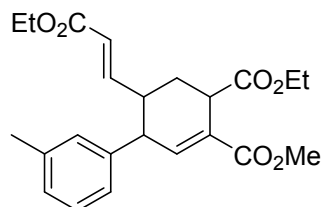

**4-Ethyl 3-methyl (*E*)-6-(3-ethoxy-3-oxoprop-1-en-1-yl)-3'-methyl-1,4,5,6-tetrahydro-[1,1'-biphenyl]-3,4-dicarboxylate **3x**.**

The reaction of diene (82.3 mg, 0.3 mmol, 1.0 equiv) and allenoate (56.8 mg, 0.45 mmol, 1.5 equiv), after a flash column chromatography (petroleum: AcOEt = 5:1) afforded the product **3x** (87.7 mg, 73% yield) and [3 + 2] adduct (15.6 mg, 13% yield).

Colorless oil.  $^1\text{H NMR}$  (300 MHz,  $\text{CDCl}_3$ )  $\delta$  1.24 – 1.27 (m, 6H, 2 $\text{CH}_3$ ), 1.77 – 1.89 (m, 1H, CH), 2.24 – 2.29 (m, 1H, CH), 2.33(s, 3H,  $\text{CH}_3$ ), 2.51 (dd,  $J = 18.5, 8.9$  Hz, 1H, CH), 3.36 – 3.39 (m, 1H, CH), 3.61 – 3.65 (m, 1H, CH), 3.74 (s, 3H,  $\text{COOCH}_3$ ), 4.09 – 4.21 (m, 4H,  $\text{COOCH}_2$ ), 5.63 (d,  $J = 15.7$  Hz, 1H,  $\text{HC}=\text{C}$ ), 6.80 (dd,  $J = 15.8, 7.7$  Hz, 1H,  $\text{C}=\text{CH}$ ), 6.88 – 6.94 (m, 2H,  $\text{HC}=\text{C}$ ; ArH ), 6.96 – 6.99 (m, 1H, ArH), 7.05 – 7.07 (m, 1H, ArH), 7.17 – 7.22 (m, 1H, ArH) ppm.  $^{13}\text{C NMR}$  (75 MHz,  $\text{CDCl}_3$ )  $\delta$  14.2 (s, 2 $\text{CH}_3$ ), 21.4 (s,  $\text{CH}_3$ ), 31.8 (s,  $\text{CH}_2$ ), 42.0 (s, CH), 43.2 (s, CH), 47.7 (s, CH), 51.9 (s,  $\text{COOCH}_3$ ), 60.3 (s,  $\text{COOCH}_2$ ), 61.0 (s,  $\text{COOCH}_2$ ), 122.2 (s, CH), 125.3 (s, CH), 128.1 (s, CH), 128.6 (s, C), 128.7 (s, CH), 128.8 (s, CH), 138.5 (s, C), 141.1 (s, C), 143.3 (s, CH), 148.9 (s, CH), 166.2 (s, C), 166.8 (s, C), 173.9 (s, C) ppm. **IR (KBr)**: 2982, 1727, 1435, 1269, 1163, 1036, 734, 698, 554  $\text{cm}^{-1}$ . **HRMS** (ESI,  $m/z$ ): Calcd for  $\text{C}_{23}\text{H}_{29}\text{O}_6$   $[\text{M}+\text{H}]^+$ : 401.1959, found: 401.1960.

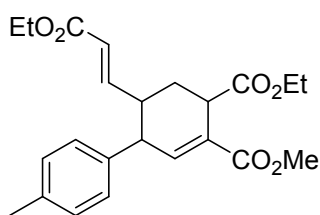

**4-Ethyl 3-methyl (*E*)-6-(3-ethoxy-3-oxoprop-1-en-1-yl)-4'-methyl-1, 4, 5, 6-tetrahydro-[1, 1'-biphenyl]-3, 4-dicarboxylate **3y**.**

The reaction of diene (82.3 mg, 0.3 mmol, 1.0 equiv) and allenolate (56.8 mg, 0.45 mmol, 1.5 equiv), after a flash column chromatography (petroleum: AcOEt = 5:1) afforded the product **3y** (105.7 mg, 88% yield) and [3 + 2] adduct (6.0 mg, 5% yield).

Colorless oil.  $^1\text{H NMR}$  (300 MHz,  $\text{CDCl}_3$ )  $\delta$  1.26 (dd,  $J = 15.3, 7.6$  Hz, 6H, 2 $\text{CH}_3$ ), 1.83 (dd,  $J = 24.1, 12.0$  Hz, 1H, CH), 2.27 – 2.29 (m, 1H, CH), 2.33 (s, 3H,  $\text{CH}_3$ ), 2.49 (dd,  $J = 18.7, 8.9$  Hz, 1H, CH), 3.38 (d,  $J = 9.7$  Hz, 1H, CH), 3.61 – 3.64 (m, 1H, CH), 3.74 (s, 3H,  $\text{COOCH}_3$ ), 4.10 – 4.21 (m, 4H, 2 $\text{COOCH}_2$ ), 5.64 (d,  $J = 15.8$  Hz, 1H,  $\text{HC}=\text{C}$ ), 6.80 (dd,  $J = 15.7, 7.8$  Hz, 1H,  $\text{C}=\text{CH}$ ), 6.90 – 6.96 (m, 1H,  $\text{HC}=\text{C}$ ), 6.99 – 7.04 (m, 2H, ArH), 7.11 – 7.13 (m, 2H, ArH) ppm.  $^{13}\text{C NMR}$  (75 MHz,  $\text{CDCl}_3$ )  $\delta$  14.2 (s,  $\text{CH}_3$ ), 14.2 (s,  $\text{CH}_3$ ), 21.1 (s,  $\text{CH}_3$ ), 31.9 (s,  $\text{CH}_2$ ), 42.0 (s, CH), 43.4 (s, CH), 47.4 (s, CH), 51.9 (s,  $\text{COOCH}_3$ ), 60.3 (s,  $\text{COOCH}_2$ ), 61.0 (s,  $\text{COOCH}_2$ ), 122.2 (s, CH), 128.0 (s, 2CH), 128.6 (s, C), 129.5 (s, 2CH), 136.9 (s, C), 138.2 (s, C),

143.4 (s, CH), 149.0 (s, CH), 166.1 (s, C), 166.8 (s, C), 173.9 (s, C) ppm. **IR (KBr)**: 2989, 1716, 1435, 1257, 1092, 1037, 735, 692, 551  $\text{cm}^{-1}$ . **HRMS** (ESI,  $m/z$ ): Calcd for  $\text{C}_{23}\text{H}_{29}\text{O}_6$   $[\text{M}+\text{H}]^+$ : 401.1959, found: 401.1961.

## 5. General procedure for synthesis of 4.

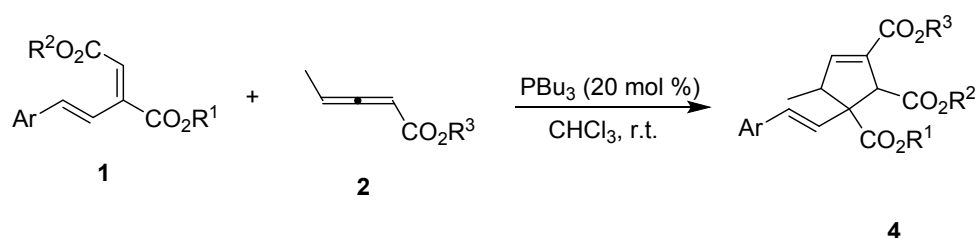

To a dry flask filled with nitrogen were added **1** (0.3 mmol) and **2** (0.45 mmol) in 3 mL  $\text{CHCl}_3$ .  $\text{PBU}_3$  (0.06 mmol) was added. This solution was stirred at r.t. until the complete consumption of the starting material as monitored by TLC. After the removal of the solvent, the residue was subjected to chromatography on a silica gel (60 - 120 mesh) column (eluant: 20% EtOAc in petroleum ether) to afford **4**.

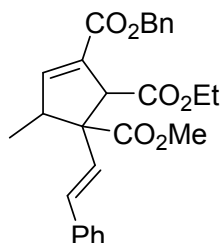

### 3-Benzyl 2-ethyl 1-methyl (*E*)-5-methyl-1-styrylcyclopent-3-ene- 1, 2, 3-tricarboxylate **4a**.

The reaction of diene (78.1 mg, 0.3 mmol, 1.0 equiv) and allenoate (84.7 mg, 0.45 mmol, 1.5 equiv), after a flash column chromatography (petroleum: AcOEt = 5:1) afforded the product **4a** (117.0 mg, 87% yield).

Colorless oil.  **$^1\text{H NMR}$  (300 MHz,  $\text{CDCl}_3$ )**  $\delta$  0.99 (t,  $J = 7.1$  Hz, 3H,  $\text{CH}_3$ ), 1.13 (d,  $J = 7.3$  Hz, 3H,  $\text{CH}_3$ ), 3.52 – 3.54 (m, 1H, CH), 3.75 (s, 3H,  $\text{COOCH}_3$ ), 3.86 – 3.94 (m, 2H,  $\text{COOCH}_2$ ), 4.57 (s, 1H, CH), 5.19 (q,  $J = 12.5$  Hz, 2H,  $\text{COOCH}_2\text{Ph}$ ), 6.40 (q,  $J = 16.4$  Hz, 2H,  $\text{CH}=\text{CH}$ ), 6.82 (s, 1H,  $\text{CH}=\text{C}$ ), 7.19 – 7.25 (m, 2H, ArH), 7.25 – 7.34 (m, 8H, ArH) ppm.  **$^{13}\text{C NMR}$  (75 MHz,  $\text{CDCl}_3$ )**  $\delta$  13.1 (s,  $\text{CH}_3$ ), 14.0 (s,  $\text{CH}_3$ ), 46.6 (s, CH), 51.3 (s,  $\text{COOCH}_3$ ), 56.8 (s, CH), 59.9 (s,  $\text{COOCH}_2$ ), 60.8 (s, C), 65.4 (s,

COOCH<sub>2</sub>Ph), 125.5 (s, 2CH), 126.4 (s, CH), 126.9 (s, CH), 127.1 (s, 2CH), 127.2 (s, CH), 127.5 (s, 2CH), 127.6 (s, 2CH), 129.7 (s, CH), 131.9 (s, C), 134.8 (s, C), 135.6 (s, C), 147.1 (s, CH), 162.8 (s, C), 169.4 (s, C), 171.9 (s, C) ppm. **IR (KBr)**: 2981, 1733, 1455, 1258, 1119, 1024, 733, 698, 550 cm<sup>-1</sup>. **HRMS** (ESI, m/z): Calcd for C<sub>27</sub>H<sub>29</sub>O<sub>6</sub> [M+H]<sup>+</sup>: 449.1959, found : 449.1957.

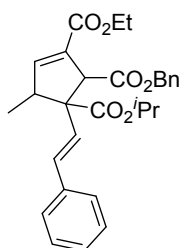

**2-Benzyl 3-ethyl 1-isopropyl (E)-5-methyl-1-styrylcyclopent-3-ene-1, 2, 3-tricarboxylate 4b.**

The reaction of diene (105.1 mg, 0.3 mmol, 1.0 equiv) and allenoate (56.8 mg, 0.45 mmol, 1.5 equiv), after a flash column chromatography (petroleum: AcOEt = 5:1) afforded the product **4b** (117.3 mg, 82% yield).

Colorless oil. **<sup>1</sup>H NMR (300 MHz, CDCl<sub>3</sub>)** δ 1.22 – 1.28 (m, 12H, 4CH<sub>3</sub>), 3.49 – 3.56 (m, 1H, CH), 4.13 – 4.20 (m, 2H, COOCH<sub>2</sub>), 4.65 (s, 1H, CH), 4.99 – 5.05 (m, 2H, COOCH<sub>2</sub>Ph), 5.09 – 5.16 (m, 1H, COOCH), 6.23 – 6.38 (m, 2H, CH=CH), 6.79 (s, 1H, CH=C), 7.17 – 7.23 (m, 5H, ArH), 7.26 – 7.35 (m, 5H, ArH) ppm. **<sup>13</sup>C NMR (75 MHz, CDCl<sub>3</sub>)** δ 14.1 (s, CH<sub>3</sub>), 15.2 (s, CH<sub>3</sub>), 21.6 (s, 2CH<sub>3</sub>), 47.9 (s, CH), 57.3 (s, CH), 60.7 (s, COOCH<sub>2</sub>), 61.6 (s, C), 66.7 (s, COOCH<sub>2</sub>Ph), 69.3 (s, COOCH), 125.6 (s, CH), 126.4 (s, 2CH), 127.8 (s, CH), 128.0 (s, CH), 128.3 (s, 2CH), 128.4 (s, 2CH), 128.6 (s, 2CH), 131.8 (s, CH), 132.6 (s, C), 135.7 (s, C), 136.6 (s, C), 148.1 (s, CH), 164.0 (s, C), 171.0 (s, C), 173.0 (s, C) ppm. **IR (KBr)**: 2982, 1723, 1453, 1256, 1116, 1030, 734, 682, 551 cm<sup>-1</sup>. **HRMS** (ESI, m/z): Calcd for C<sub>29</sub>H<sub>33</sub>O<sub>6</sub> [M+H]<sup>+</sup>: 477.2272, found: 477.2276.

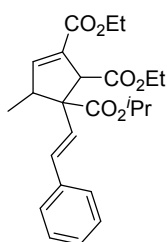

**2, 3-Diethyl 1-isopropyl (E)-5-methyl-1-styrylcyclopent-3-ene-1, 2, 3-**

### tricarboxylate **4c**.

The reaction of diene (86.5 mg, 0.3 mmol, 1.0 equiv) and allenolate (56.8 mg, 0.45 mmol, 1.5 equiv), after a flash column chromatography (petroleum: AcOEt = 5:1) afforded the product **4c** (90.7 mg, 73% yield).

Colorless oil.  $^1\text{H NMR}$  (300 MHz,  $\text{CDCl}_3$ )  $\delta$  1.14 (t,  $J = 7.1$  Hz, 3H,  $\text{CH}_3$ ), 1.23 – 1.25 (m, 3H,  $\text{CH}_3$ ), 1.29 – 1.34 (m, 9H,  $3\text{CH}_3$ ), 3.48 – 3.56 (m, 1H, CH), 4.04 – 4.11 (m, 2H,  $\text{COOCH}_2$ ), 4.18 – 4.23 (m, 2H,  $\text{COOCH}_2$ ), 4.58 (s, 1H, CH), 5.12 – 5.21 (m, 1H,  $\text{COOCH}$ ), 6.33 (q,  $J = 16.5$  Hz, 2H,  $\text{CH}=\text{CH}$ ), 6.78 (s, 1H,  $\text{CH}=\text{C}$ ), 7.27 – 7.31 (m, 5H, ArH) ppm.  $^{13}\text{C NMR}$  (75 MHz,  $\text{CDCl}_3$ )  $\delta$  14.2 (s,  $2\text{CH}_3$ ), 15.2 (s,  $\text{CH}_3$ ), 21.7 (s,  $2\text{CH}_3$ ), 47.8 (s, CH), 57.3 (s, CH), 60.6 (s,  $\text{COOCH}_2$ ), 60.8 (s,  $\text{COOCH}_2$ ), 61.5 (s, C), 69.2 (s,  $\text{COOCH}$ ), 125.8 (s, CH), 126.3 (s, 2CH), 127.8 (s, CH), 128.6 (s, 2CH), 131.6 (s, CH), 132.7 (s, C), 136.8 (s, C), 147.9 (s, CH), 164.07 (s, C), 171.16 (s, C), 173.07 (s, C) ppm. IR (KBr): 2980, 1723, 1454, 1257, 1116, 1029, 735, 692, 550  $\text{cm}^{-1}$ . HRMS (ESI, m/z): Calcd for  $\text{C}_{24}\text{H}_{31}\text{O}_6$   $[\text{M}+\text{H}]^+$ : 415.2115, found: 415.2117.

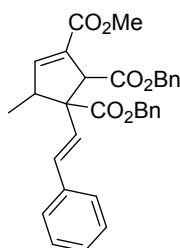

### 1, 2-Dibenzyl 3-methyl (*E*)-5-methyl-1-styrylcyclopent-3-ene-1, 2, 3-tricarboxylate **4d**.

The reaction of diene (119.5 mg, 0.3 mmol, 1.0 equiv) and allenolate (50.5 mg, 0.45 mmol, 1.5 equiv), after a flash column chromatography (petroleum: AcOEt = 5:1) afforded the product **4d** (137.8 mg, 90% yield).

Colorless oil.  $^1\text{H NMR}$  (300 MHz,  $\text{CDCl}_3$ )  $\delta$  1.22 (d,  $J = 7.4$  Hz, 3H,  $\text{CH}_3$ ), 3.54 – 3.59 (m, 1H, CH), 3.68 (s, 3H,  $\text{COOCH}_3$ ), 4.69 (t,  $J = 1.7$  Hz, 1H, CH), 5.04 (s, 2H,  $\text{COOCH}_2\text{Ph}$ ), 5.26 (s, 2H,  $\text{COOCH}_2\text{Ph}$ ), 6.19 (q,  $J = 16.6$  Hz, 2H,  $\text{CH}=\text{CH}$ ), 6.81 (t,  $J = 2.1$  Hz, 1H,  $\text{CH}=\text{C}$ ), 7.09 – 7.12 (m, 2H, ArH), 7.20 – 7.24 (m, 7H, ArH), 7.31–7.35 (m, 6H, ArH) ppm.  $^{13}\text{C NMR}$  (75 MHz,  $\text{CDCl}_3$ )  $\delta$  15.2 (s,  $\text{CH}_3$ ), 47.9 (s, CH), 51.7 (s, CH), 57.2 (s,  $\text{COOCH}_3$ ), 61.7 (s, C), 66.8 (s,  $\text{COOCH}_2\text{Ph}$ ), 67.4 (s,  $\text{COOCH}_2\text{Ph}$ ), 125.1 (s, CH), 126.4 (s, 2CH), 127.8 (s, CH), 128.0 (s, CH), 128.35 (s, 2CH), 128.35

(s, 2CH), 128.37 (s, CH), 128.4 (s, 2CH), 128.5 (s, 2CH), 128.6 (s, 2CH), 132.1 (s, CH), 132.3 (s, C), 135.5 (s, C), 135.6 (s, C), 136.4 (s, C), 148.5 (s, CH), 164.3(s, C), 170.9 (s, C), 173.4 (s, C) ppm. **IR (KBr)**: 2981, 1727, 1454, 1260, 1119, 1041, 745, 696, 550  $\text{cm}^{-1}$ . **HRMS** (ESI, m/z): Calcd for  $\text{C}_{32}\text{H}_{31}\text{O}_6$   $[\text{M}+\text{H}]^+$ : 511.2115, found: 511.2116.

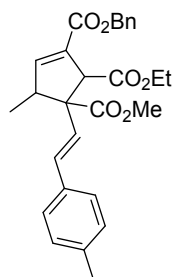

**3-Benzyl 2-ethyl 1-methyl (*E*)-5-methyl-1-(4-methylstyryl)cyclopent-3-ene-1, 2, 3-tricarboxylate 4e.**

The reaction of diene (82.3 mg, 0.3 mmol, 1.0 equiv) and allenoate (84.7 mg, 0.45 mmol, 1.5 equiv), after a flash column chromatography (petroleum: AcOEt = 5:1) afforded the product **4e** (116.5 mg, 84% yield).

Colorless oil.  **$^1\text{H NMR}$  (300 MHz,  $\text{CDCl}_3$ )**  $\delta$  1.07 (t,  $J = 7.1$  Hz, 3H,  $\text{CH}_3$ ), 1.23 – 1.25 (m, 3H,  $\text{CH}_3$ ), 2.33 (s, 3H,  $\text{CH}_3$ ), 3.54 – 3.61 (m, 1H, CH), 3.83 (s, 3H,  $\text{COOCH}_3$ ), 4.00 (q,  $J = 7.1$  Hz, 2H,  $\text{COOCH}_2$ ), 4.57 – 4.63 (m, 1H, CH), 5.19 (m, 2H,  $\text{COOCH}_2\text{Ph}$ ), 6.18 – 6.32 (m, 2H,  $\text{CH}=\text{CH}$ ), 6.86 – 6.87 (m, 1H,  $\text{CH}=\text{C}$ ), 7.09 – 7.12 (m, 2H, ArH), 7.20 – 7.23 (m, 2H, ArH), 7.35 – 7.38 (m, 5H, ArH) ppm.  **$^{13}\text{C NMR}$  (75 MHz,  $\text{CDCl}_3$ )**  $\delta$  14.1 (s,  $\text{CH}_3$ ), 15.3 (s,  $\text{CH}_3$ ), 21.2 (s,  $\text{CH}_3$ ), 48.0 (s, CH), 52.8 (s, CH), 57.3 (s,  $\text{COOCH}_3$ ), 61.0 (s,  $\text{COOCH}_2$ ), 61.5 (s, C), 66.4 (s,  $\text{COOCH}_2\text{Ph}$ ), 124.3 (s, CH), 126.3 (s, 2CH), 128.2 (s, 2CH), 128.5 (s, 2CH), 129.3 (s, 2CH), 131.8 (s, CH), 132.3 (s, C), 133.7 (s, C), 135.7 (s, C), 137.8 (s, C), 149.0 (s, CH), 163.8 (s, C), 171.1 (s, C), 174.3 (s, C) ppm. **IR (KBr)**: 2980, 1734, 1435, 1264, 1114, 1035, 734, 692, 550  $\text{cm}^{-1}$ . **HRMS** (ESI, m/z): Calcd for  $\text{C}_{28}\text{H}_{31}\text{O}_6$   $[\text{M}+\text{H}]^+$ : 463.2115, found: 463.2117.

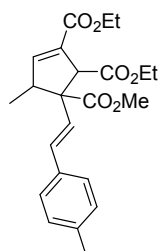



**2, 3-diethyl 1-methyl (*E*)-5-methyl-1-(4-methylstyryl)cyclopent-3-ene- 1, 2, 3-tricarboxylate 4f.**

The reaction of diene (82.3 mg, 0.3 mmol, 1.0 equiv) and allenoate (56.8 mg, 0.45 mmol, 1.5 equiv), after a flash column chromatography (petroleum: AcOEt = 5:1) afforded the product **4f** (87.5mg, 76% yield).

Colorless oil. <sup>1</sup>H NMR (300 MHz, CDCl<sub>3</sub>) δ 1.15 (t, *J* = 7.1 Hz, 3H, CH<sub>3</sub>), 1.23 – 1.31 (m, 6H, 2CH<sub>3</sub>), 2.33 (s, 3H, CH<sub>3</sub>), 3.53 – 3.60 (m, 1H, CH), 3.83 (s, 3H, COOCH<sub>3</sub>), 4.08 (q, *J* = 7.1 Hz, 2H, COOCH<sub>2</sub>), 4.16 – 4.24 (m, 2H, COOCH<sub>2</sub>), 4.59 (s, 1H, CH), 6.18 – 6.32 (m, 2H, CH=CH), 6.81 (s, 1H, CH=C), 7.09 – 7.12 (m, 2H, ArH), 7.20 – 7.23 (m, 2H, ArH) ppm. <sup>13</sup>C NMR (75 MHz, CDCl<sub>3</sub>) δ 14.1 (s, CH<sub>3</sub>), 14.2 (s, CH<sub>3</sub>), 15.3 (s, CH<sub>3</sub>), 21.2 (s, CH<sub>3</sub>), 47.9 (s, CH), 52.8 (s, CH), 57.3 (s, COOCH<sub>3</sub>), 60.6 (s, COOCH<sub>2</sub>), 60.9 (s, COOCH<sub>2</sub>), 61.5 (s, C), 124.4 (s, CH), 126.3 (s, 2CH), 129.3 (s, 2CH), 131.7 (s, CH), 132.7 (s, C), 133.7 (s, C), 137.7 (s, C), 148.2 (s, CH), 164.0 (s, C), 171.1 (s, C), 174.4 (s, C) ppm. IR (KBr): 2978, 1714, 1454, 1264, 1114, 1035, 735, 693, 550 cm<sup>-1</sup>. HRMS (ESI, m/z): Calcd for C<sub>23</sub>H<sub>29</sub>O<sub>6</sub> [M+H]<sup>+</sup>: 401.1959, found: 401.1962.

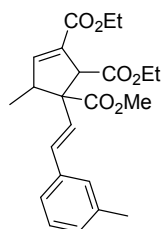

**2, 3-Diethyl 1-methyl (*E*)-5-methyl-1-(3-methylstyryl)cyclopent-3-ene- 1, 2, 3-tricarboxylate 4g.**

The reaction of diene (82.3 mg, 0.3 mmol, 1.0 equiv) and allenoate (56.8 mg, 0.45 mmol, 1.5 equiv), after a flash column chromatography (petroleum: AcOEt = 5:1) afforded the product **4g** (105.6 mg, 88% yield).

Colorless oil. <sup>1</sup>H NMR (300 MHz, CDCl<sub>3</sub>) δ 1.16 – 1.31 (m, 9H, 3CH<sub>3</sub>), 2.33 (s, 3H, CH<sub>3</sub>), 3.56 – 3.58 (m, 1H, CH), 3.83 (s, 3H, COOCH<sub>3</sub>), 4.06 – 4.23 (m, 4H, 2COOCH<sub>2</sub>), 4.55-4.59 (m, 1H, CH), 6.27-6.40 (m, 2H, CH=CH), 6.81 (s, 1H, CH=C), 7.05 – 7.07 (m, 1H, ArH), 7.11 – 7.22 (m, 3H, ArH) ppm. <sup>13</sup>C NMR (75 MHz, CDCl<sub>3</sub>) δ 14.1 (s, CH<sub>3</sub>), 14.2 (s, CH<sub>3</sub>), 15.3 (s, CH<sub>3</sub>), 21.4 (s, CH<sub>3</sub>), 47.9 (s, CH), 52.8 (s, CH), 57.3 (s, COOCH<sub>3</sub>), 60.7 (s, COOCH<sub>2</sub>), 60.9 (s, COOCH<sub>2</sub>), 61.6 (s, C), 123.5

(s, CH), 125.2 (s, CH), 127.0 (s, CH), 128.5 (s, CH), 128.7 (s, CH), 132.0 (s, CH), 132.7 (s, C), 136.5 (s, C), 138.1 (s, C), 148.2 (s, CH), 164.0 (s, C), 171.1 (s, C), 174.3 (s, C) ppm. **IR (KBr)**: 2981, 1711, 1454, 1263, 1116, 1030, 735, 692, 550  $\text{cm}^{-1}$ . **HRMS** (ESI,  $m/z$ ): Calcd for  $\text{C}_{23}\text{H}_{29}\text{O}_6$   $[\text{M}+\text{H}]^+$ : 401.1959, found: 401.1960.

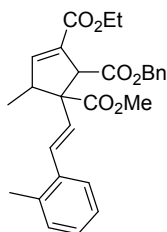

**2-Benzyl 3-ethyl 1-methyl (E)-5-methyl-1-(2-methylstyryl)cyclopent-3-ene- 1, 2, 3-tricarboxylate 4h.**

The reaction of diene (100.9 mg, 0.3 mmol, 1.0 equiv) and allenolate (56.8 mg, 0.45 mmol, 1.5 equiv), after a flash column chromatography (petroleum: AcOEt = 5:1) afforded the product **4h** (123.5 mg, 89% yield).

Colorless oil.  **$^1\text{H}$  NMR (300 MHz,  $\text{CDCl}_3$ )**  $\delta$  1.21 – 1.26 (m, 6H, 2 $\text{CH}_3$ ), 2.24 – 2.28 (m, 3H,  $\text{CH}_3$ ), 3.56 – 3.63 (m, 1H, CH), 3.81 (s, 3H,  $\text{COOCH}_3$ ), 4.13 – 4.20 (m, 2H,  $\text{COOCH}_2$ ), 4.67 (s, 1H, CH), 4.96 – 5.12 (m, 2H,  $\text{COOCH}_2\text{Ph}$ ), 6.09 – 6.14 (m, 1H,  $\text{CH}=\text{C}$ ), 6.50 (d,  $J = 16.4$  Hz, 1H,  $\text{C}=\text{CH}$ ), 6.82 (s, 1H,  $\text{CH}=\text{C}$ ), 7.12 – 7.27 (m, 4H, ArH) ppm.  **$^{13}\text{C}$  NMR (75 MHz,  $\text{CDCl}_3$ )**  $\delta$  14.1 (s,  $\text{CH}_3$ ), 15.3 (s,  $\text{CH}_3$ ), 19.6 (s,  $\text{CH}_3$ ), 47.8 (s, CH), 52.7 (s, CH), 57.3 (s,  $\text{COOCH}_3$ ), 60.7 (s,  $\text{COOCH}_2$ ), 61.9 (s, C), 66.8 (s,  $\text{COOCH}_2\text{Ph}$ ), 125.7 (s), 126.2 (s), 126.7 (s), 127.8 (s), 128.1 (s), 128.3 (s), 128.3 (s), 130.1 (s), 130.2 (s), 132.6 (s), 135.5 (s), 135.6 (s), 135.8 (s), 148.4(s), 148.4(s), 163.9 (s), 171.0 (s), 174.3(s) ppm. **IR (KBr)**: 2979, 1733, 1455, 1257, 1119, 1024, 733, 698, 550  $\text{cm}^{-1}$ . **HRMS** (ESI,  $m/z$ ): Calcd for  $\text{C}_{28}\text{H}_{31}\text{O}_6$   $[\text{M}+\text{H}]^+$ : 463.2115, found: 463.2119.

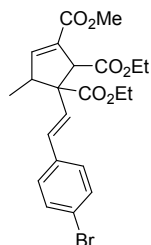

**1, 2-Diethyl 3-methyl (E)-1-(4-bromostyryl)-5-methylcyclopent-3-ene- 1, 2, 3-tricarboxylate 4i.**

The reaction of diene (106.0 mg, 0.3 mmol, 1.0 equiv) and allenolate (50.5 mg, 0.45 mmol, 1.5 equiv), after a flash column chromatography (petroleum: AcOEt = 5:1)

afforded the product **4i** (114.4 mg, 82% yield).

Colorless oil. **<sup>1</sup>H NMR (300 MHz, CDCl<sub>3</sub>)**  $\delta$  1.14 (t,  $J = 7.0$  Hz, 3H, CH<sub>3</sub>), 1.22 – 1.24 (m, 3H, CH<sub>3</sub>), 1.31 – 1.36 (m, 3H, CH<sub>3</sub>), 1.53 – 1.59 (m, 1H, CH), 3.75 (s, 3H, COOCH<sub>3</sub>), 4.08 (q,  $J = 7.1$  Hz, 2H, COOCH<sub>2</sub>), 4.30 (q,  $J = 14.3, 7.2$  Hz, 2H, COOCH<sub>2</sub>), 4.59 (s, 1H, CH), 6.29-6.38 (m, 2H, CH=CH), 6.73-6.86 (m, 1H, CH=C), 7.17 – 7.22 (m, 2H, ArH), 7.41 – 7.44 (m, 2H, ArH) ppm. **<sup>13</sup>C NMR (75 MHz, CDCl<sub>3</sub>)**  $\delta$  14.2 (s, CH<sub>3</sub>), 14.2 (s, CH<sub>3</sub>), 15.2 (s, CH<sub>3</sub>), 47.9 (s, CH), 51.8 (s, CH), 57.2 (s, COOCH<sub>3</sub>), 60.9 (s, COOCH<sub>2</sub>), 61.5 (s, C), 61.8 (s, COOCH<sub>2</sub>), 121.7 (s, C), 126.5 (s, CH), 127.8 (s, 2CH), 130.6 (s, CH), 131.7 (s, 2CH), 132.4 (s, C), 135.6 (s, C), 148.2 (s, CH), 164.4 (s, C), 171.0 (s, C), 173.4 (s, C) ppm. **IR (KBr):** 2981, 1714, 1435, 1258, 1118, 1032, 735, 693, 550 cm<sup>-1</sup>. **HRMS (ESI, m/z):** Calcd for C<sub>22</sub>H<sub>26</sub>BrO<sub>6</sub> [M+H]<sup>+</sup>: 465.0907, found: 465.0906.

1. H. Audrain, J. Thorhauge, R. G. Hazell, K. A. Joergensen, *J. Org. Chem.*, 2000, **65**, 4487.
2. R. W. Lang, H.-J. Hansen, *Organic Syntheses*. 1990, **62**, 202.

## 6. Copies of $^1\text{H}$ NMR, $^{13}\text{C}$ NMR Spectra

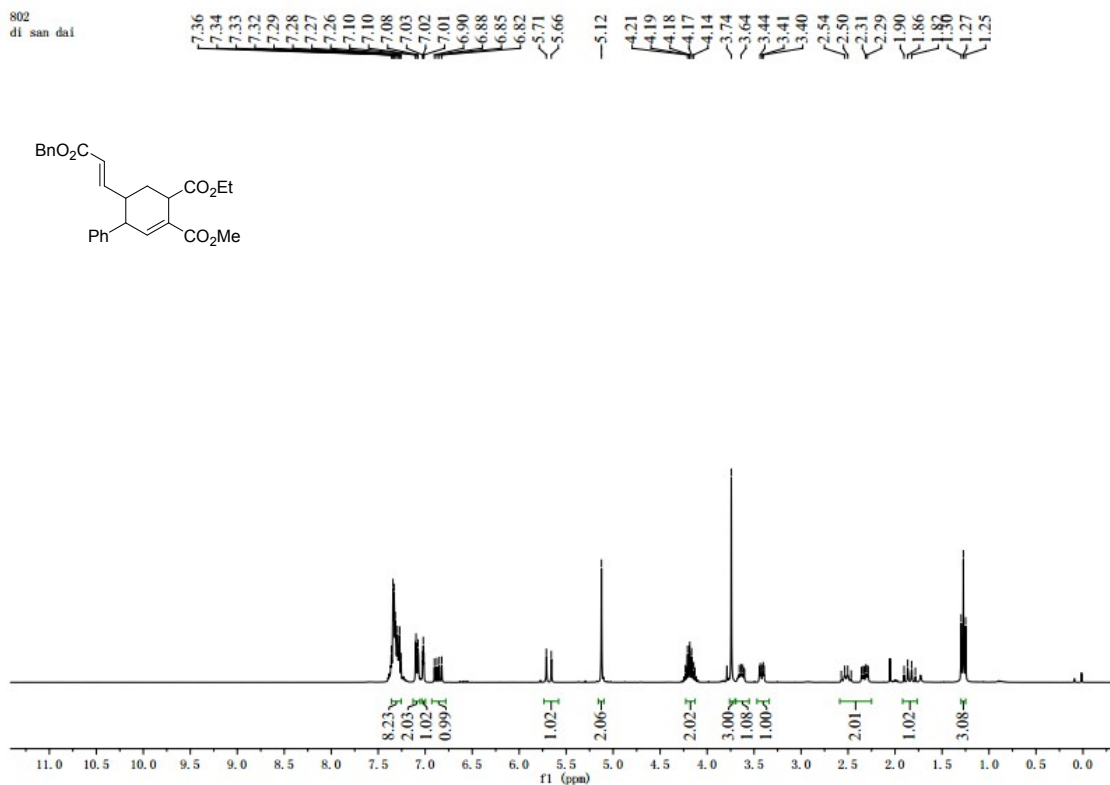

Compound 3a  $^1\text{H}$  NMR

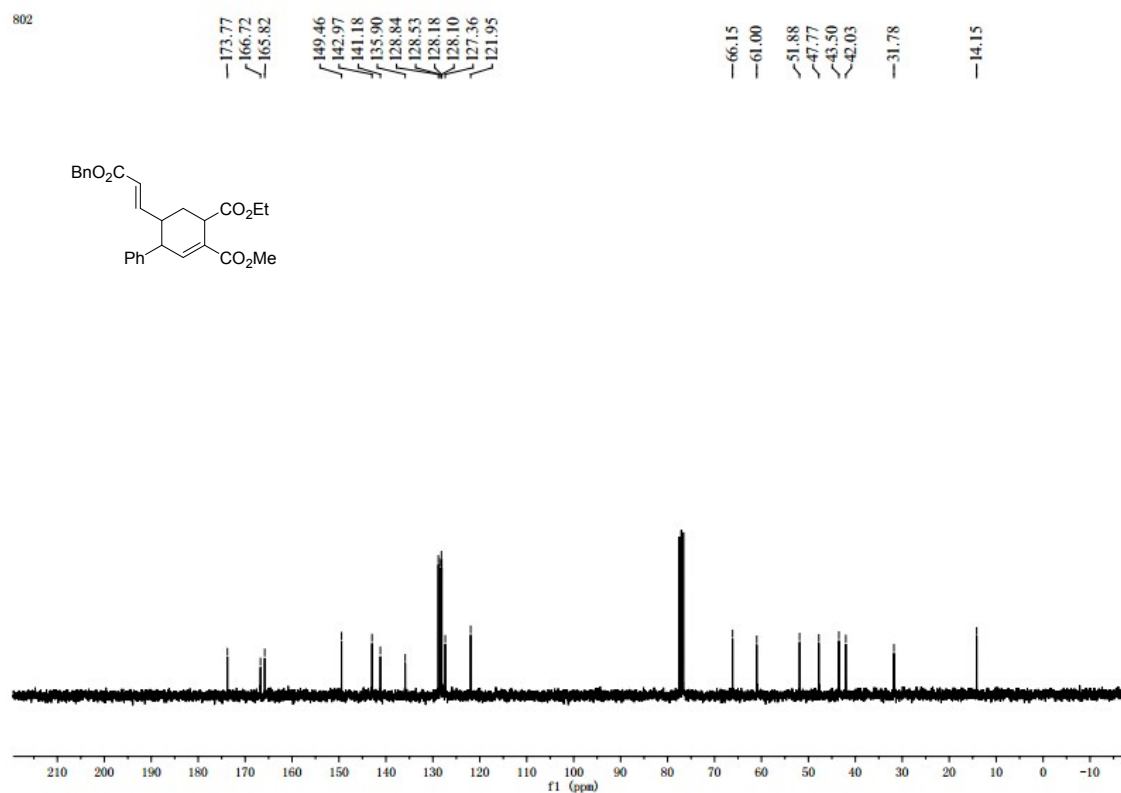

Compound 3a  $^{13}\text{C}$  NMR

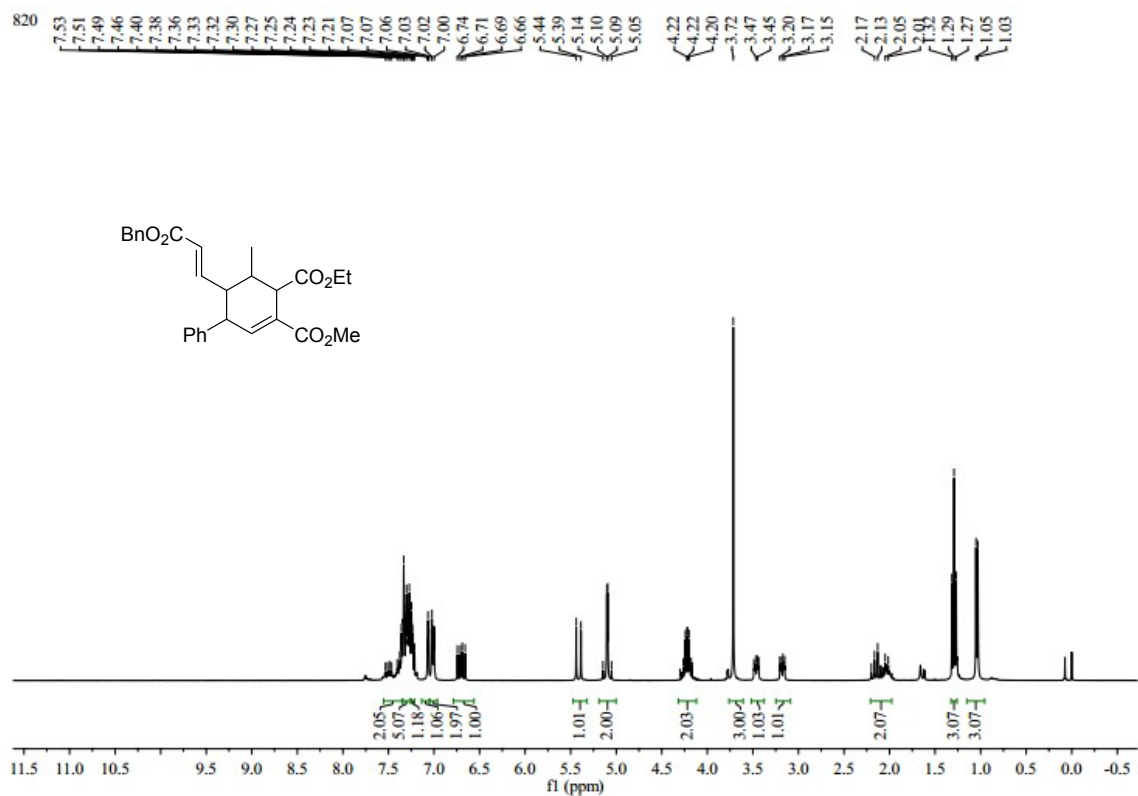

Compound 3b <sup>1</sup>H NMR

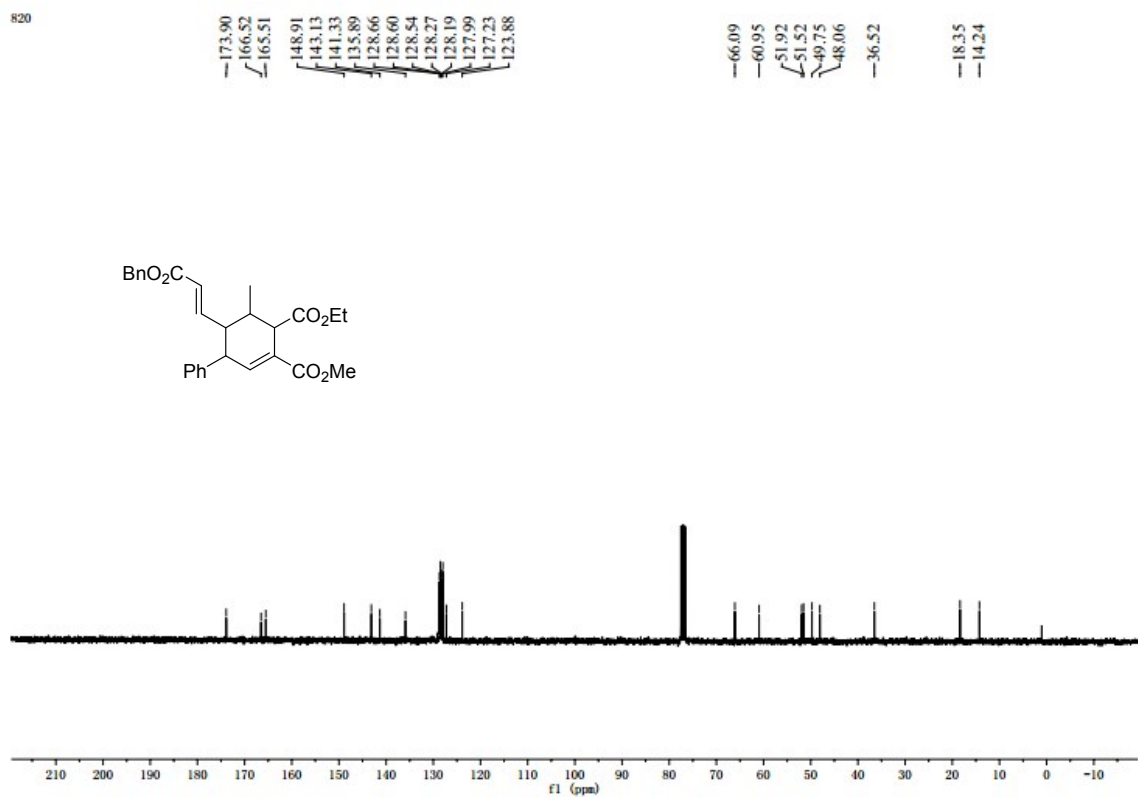

Compound 3b <sup>13</sup>C NMR

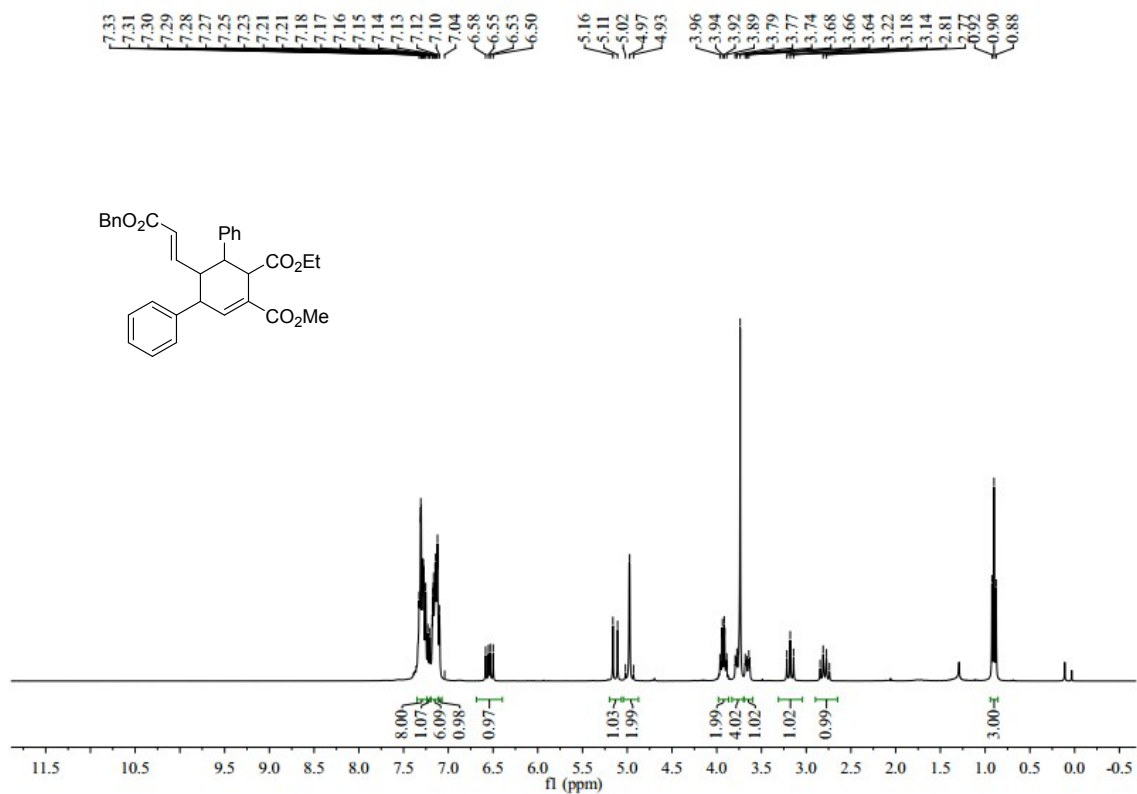

Compound 3c <sup>1</sup>H NMR

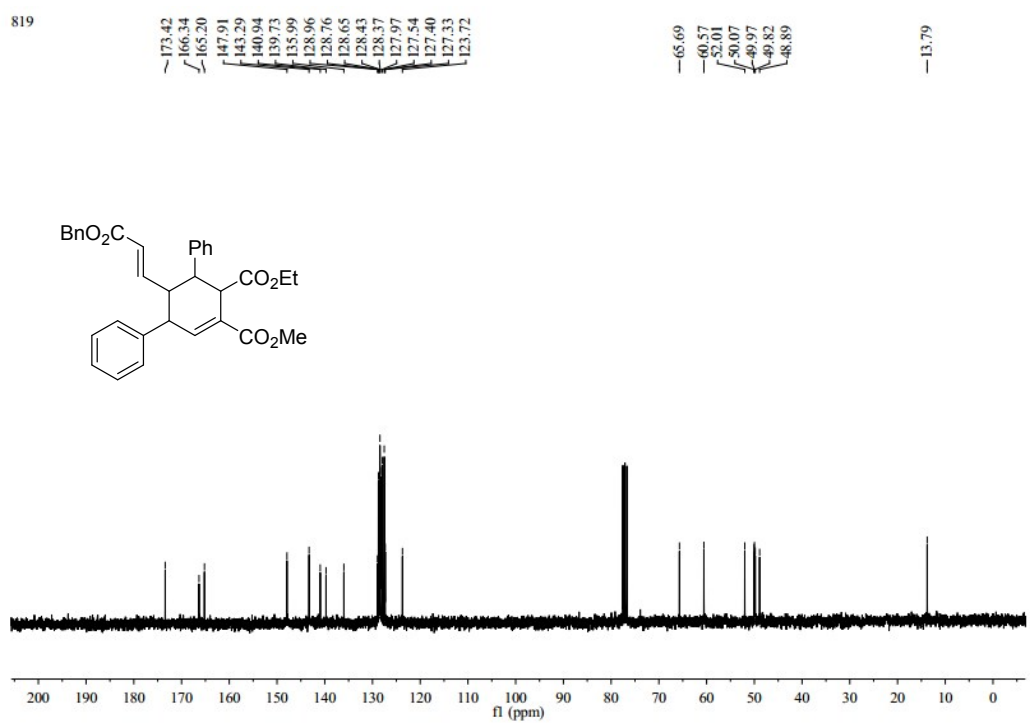

Compound 3c <sup>13</sup>C NMR

955  
yi zhi , fei 955

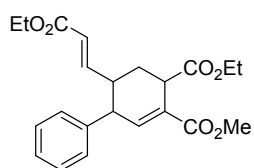

7.32  
7.29  
7.27  
7.25  
7.24  
7.23  
7.08  
7.08  
7.06  
7.00  
6.99  
6.99  
6.82  
6.80  
6.77  
6.74  
5.63  
5.58  
4.19  
4.17  
4.14  
4.13  
4.12  
4.09  
4.07  
3.72  
3.39  
2.29  
1.89  
1.87  
1.85  
1.88  
1.26  
1.24  
1.23  
1.21

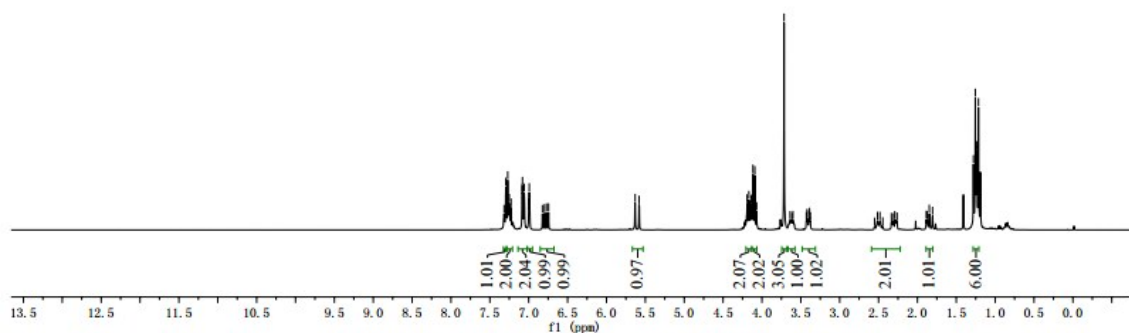

Compound 3d <sup>1</sup>H NMR

955  
yi zhi , fei 955

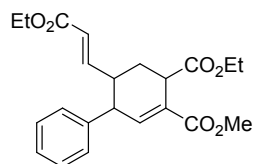

173.8  
166.7  
166.0  
148.8  
143.0  
141.2  
128.8  
128.2  
127.3  
122.3  
61.0  
60.3  
51.8  
47.7  
43.4  
42.0  
31.8  
14.1

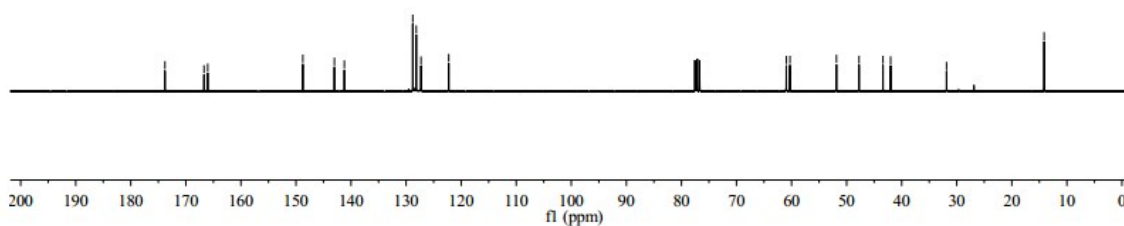

Compound 3d <sup>13</sup>C NMR

1846

7.39  
7.37  
7.36  
7.35  
7.32  
7.30  
7.28  
7.27  
7.26  
7.25  
7.10  
7.10  
7.08  
7.02  
7.02  
7.01  
6.83  
6.80  
6.78  
6.75  
5.63  
5.57  
5.24  
5.20  
5.13  
5.09  
4.16  
4.15  
4.14  
4.13  
4.11  
4.09  
3.40  
2.52  
2.49  
2.31  
1.91  
1.87  
1.86  
1.24  
1.22  
1.20  
1.17

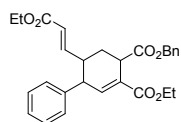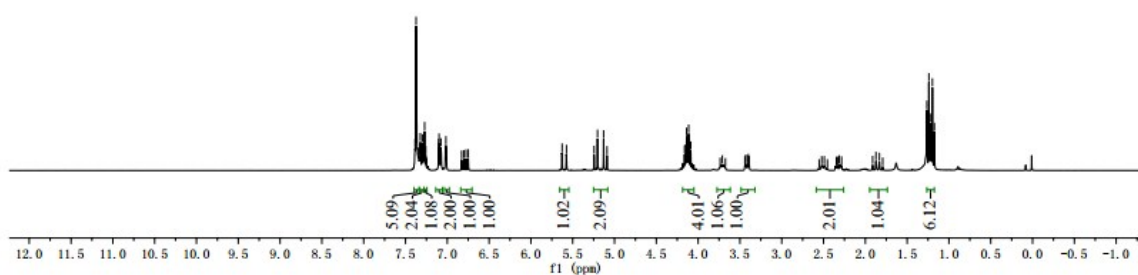Compound 3e <sup>1</sup>H NMR

1846

173.7  
166.2  
166.1  
148.7  
142.9  
141.2  
135.7  
128.9  
128.8  
128.6  
128.3  
128.2  
127.3  
122.3  
66.8  
60.9  
60.4  
47.8  
43.5  
42.1  
31.9  
14.2  
14.1

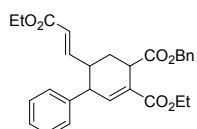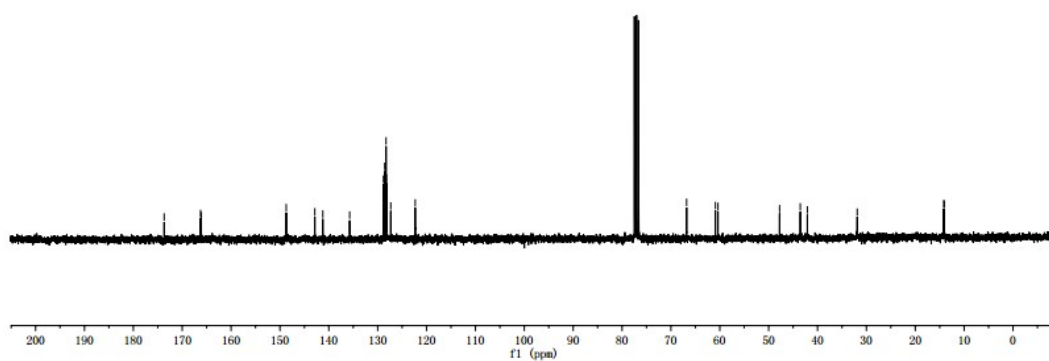Compound 3e <sup>13</sup>C NMR



1852  
2

7.37  
7.33  
7.30  
7.28  
7.27  
7.11  
7.08  
7.04  
7.00  
6.83  
6.80  
6.77  
6.75  
5.63  
5.57  
5.19  
5.14  
5.10  
5.04  
4.16  
4.14  
4.11  
4.09  
3.43  
3.40  
2.56  
2.52  
2.49  
2.46  
2.34  
2.33  
2.31  
2.29  
1.91  
1.87  
1.82  
1.79  
1.26  
1.24  
1.21  
1.20  
1.18

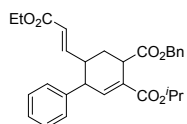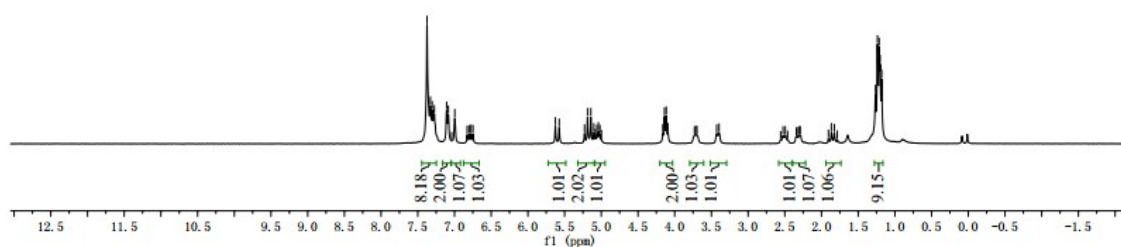

Compound 3f <sup>1</sup>H NMR

173.72  
166.10  
165.78  
148.77  
142.53  
141.30  
135.71  
129.19  
128.81  
128.57  
128.27  
128.22  
127.30  
122.30  
68.48  
66.78  
60.36  
47.78  
43.56  
42.14  
31.94  
21.78  
21.65  
14.17

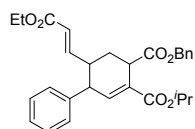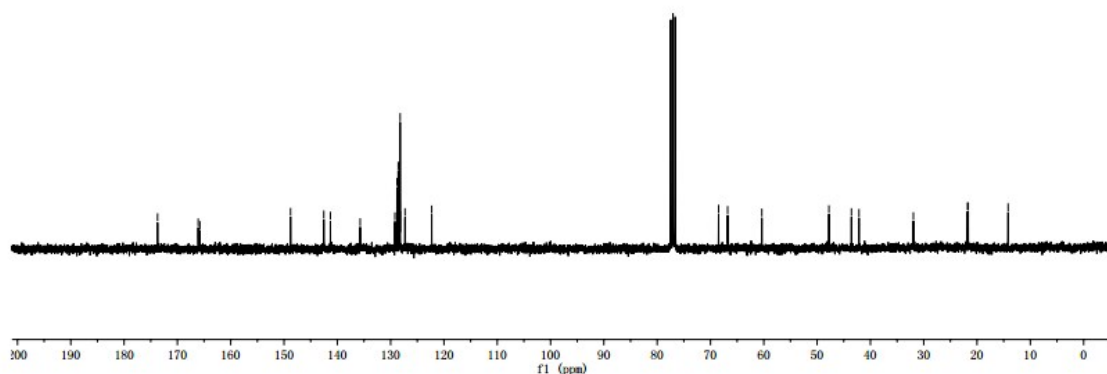

Compound 3f <sup>13</sup>C NMR

1863  
4+2

7.35  
7.32  
7.30  
7.28  
7.11  
7.09  
6.98  
6.93  
6.84  
6.81  
6.79  
6.76  
5.64  
5.59  
5.09  
5.07  
5.05  
4.21  
4.19  
4.17  
4.14  
4.12  
4.09  
3.40  
2.52  
2.49  
2.32  
2.28  
1.85  
1.81  
1.27  
1.25  
1.24  
1.22

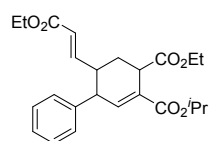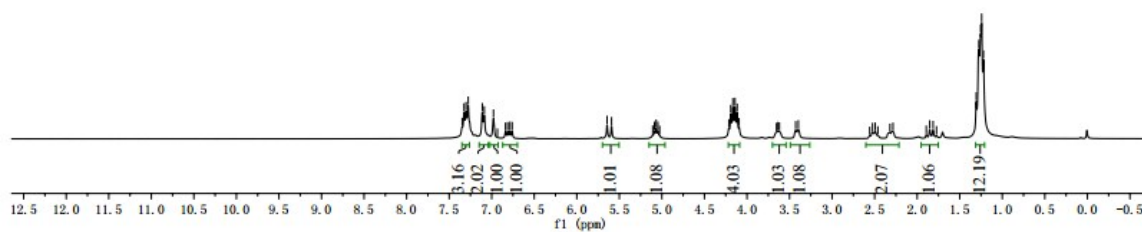

Compound 3g <sup>1</sup>H NMR

1863  
4+2

173.9  
166.1  
165.8  
148.9  
142.3  
141.4  
129.4  
128.8  
128.2  
127.3  
122.2  
68.4  
61.0  
60.3  
47.8  
43.5  
42.1  
32.0  
21.8  
21.7  
14.2  
14.1

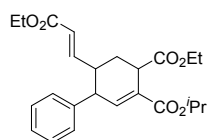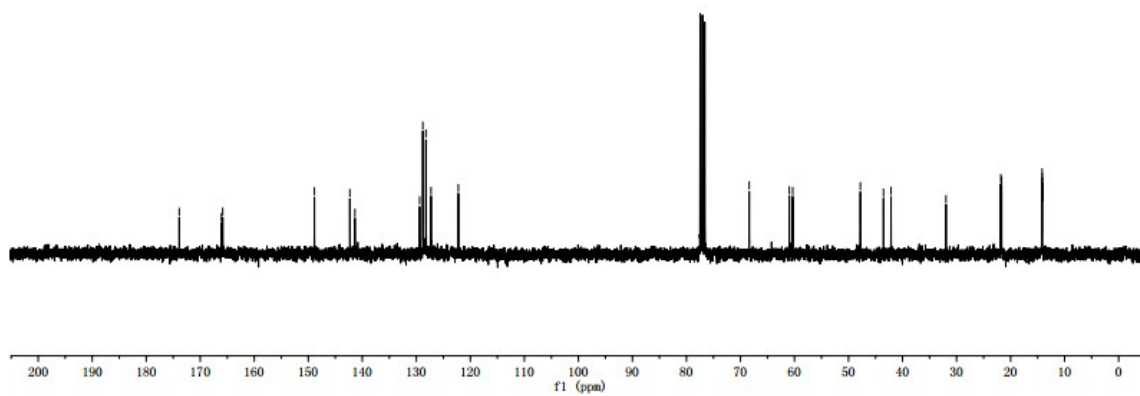

Compound 3g <sup>13</sup>C NMR

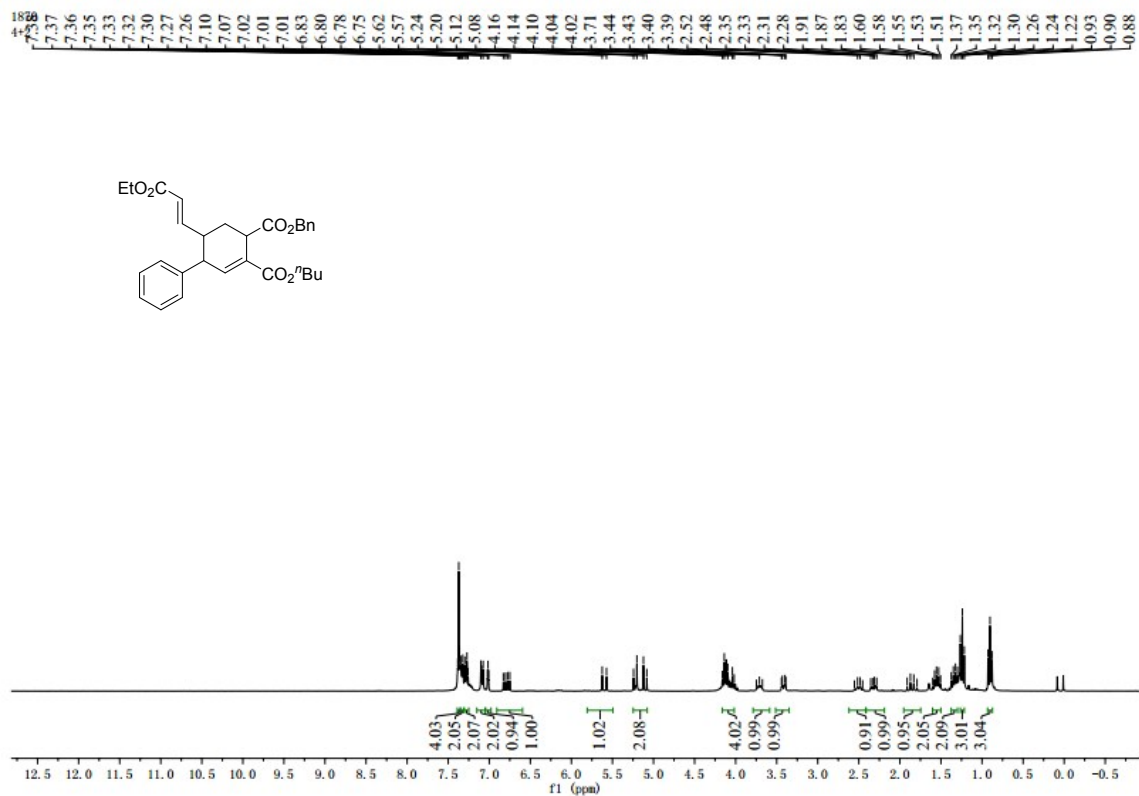

Compound 3h <sup>1</sup>H NMR

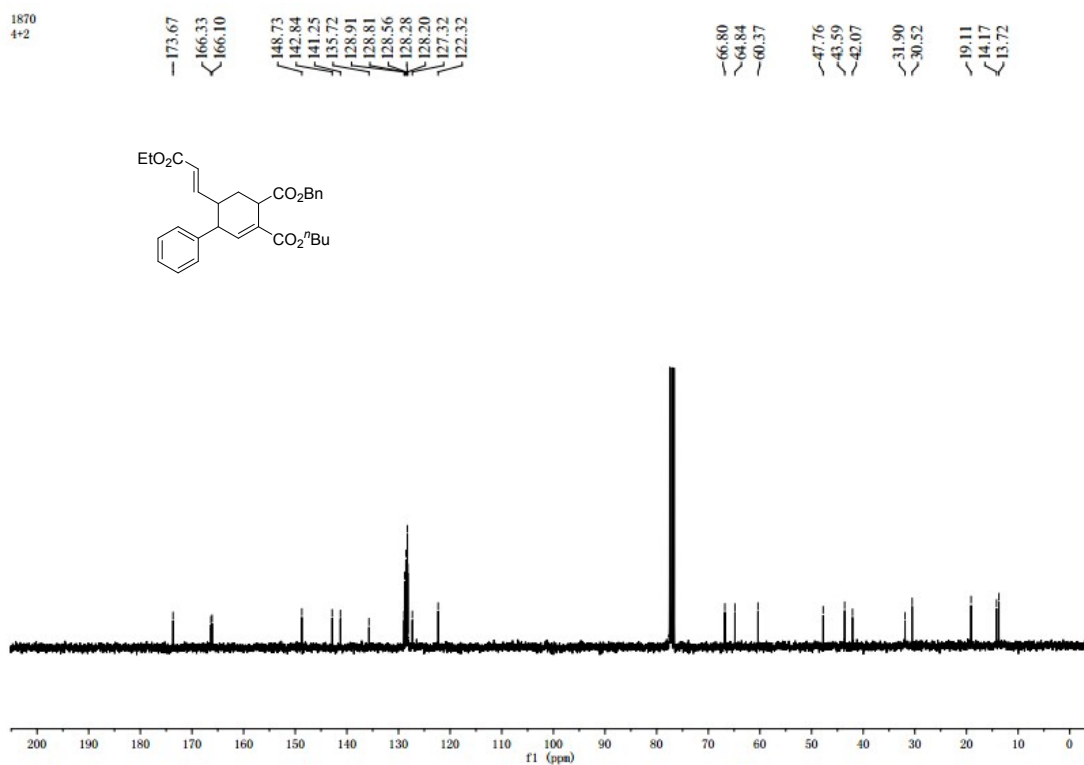

Compound 3h <sup>13</sup>C NMR

1896  
4+2

7.30  
7.28  
7.26  
7.09  
7.07  
5.63  
5.58  
5.18  
5.14  
5.10  
5.06  
5.02  
4.98  
4.17  
4.14  
4.12  
3.44  
3.41  
2.53  
2.49  
2.32  
2.30  
1.88  
1.84  
1.24  
1.22

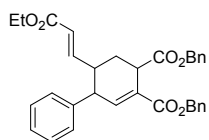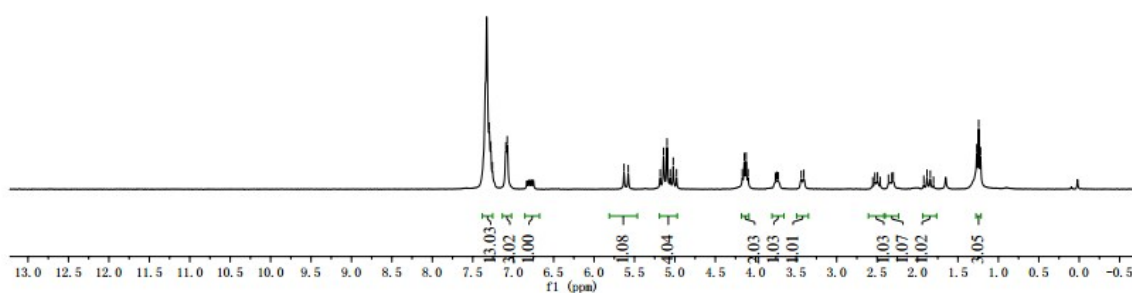

Compound 3i <sup>1</sup>H NMR

1896  
4+2

173.55  
166.05  
148.62  
143.47  
141.11  
135.69  
135.65  
128.82  
128.70  
128.54  
128.52  
128.26  
128.24  
128.20  
127.34  
122.37  
66.77  
66.64  
60.35  
47.82  
43.52  
42.10  
31.89  
14.16

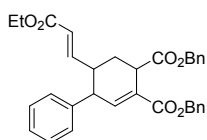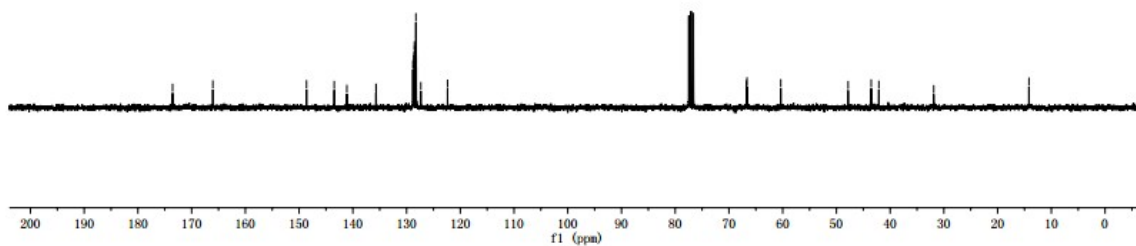

Compound 3i <sup>13</sup>C NMR

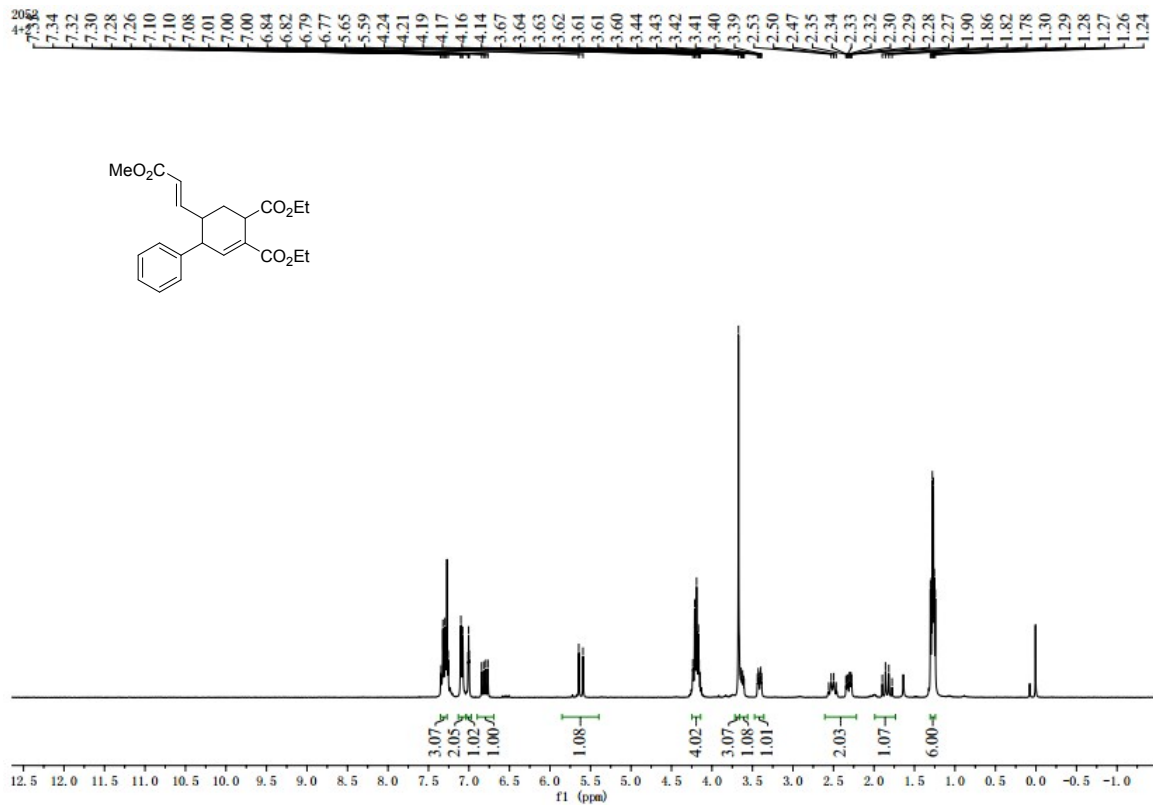

Compound 3j <sup>1</sup>H NMR

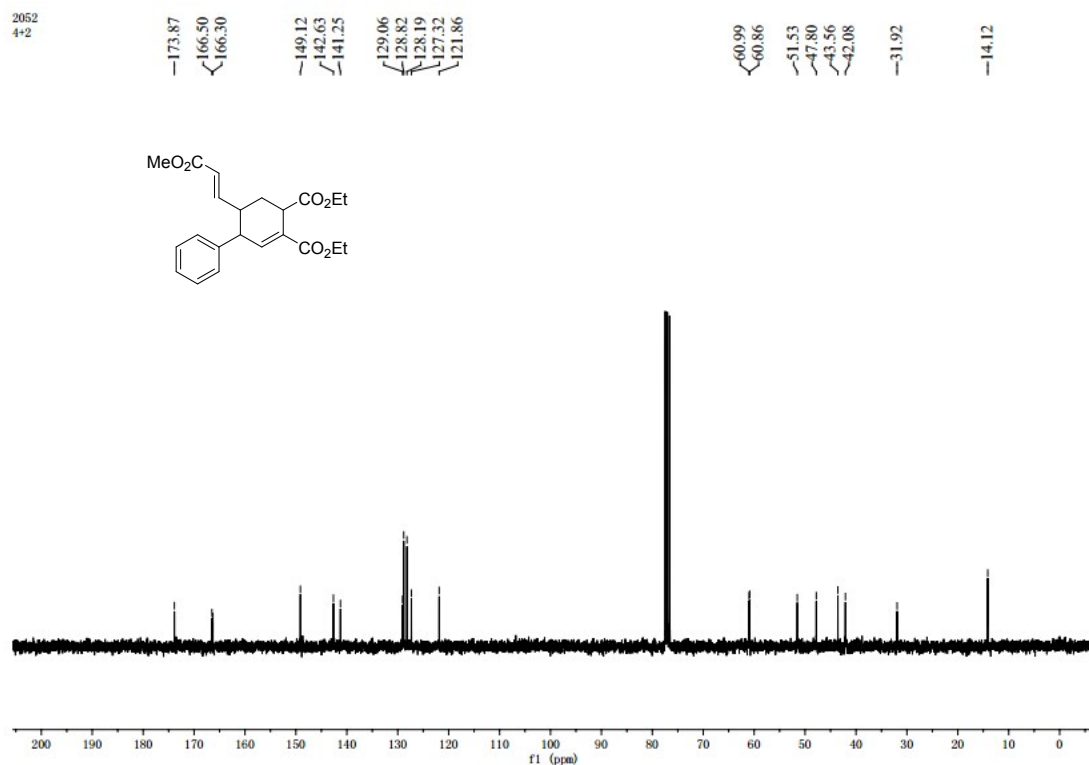

Compound 3j <sup>13</sup>C NMR

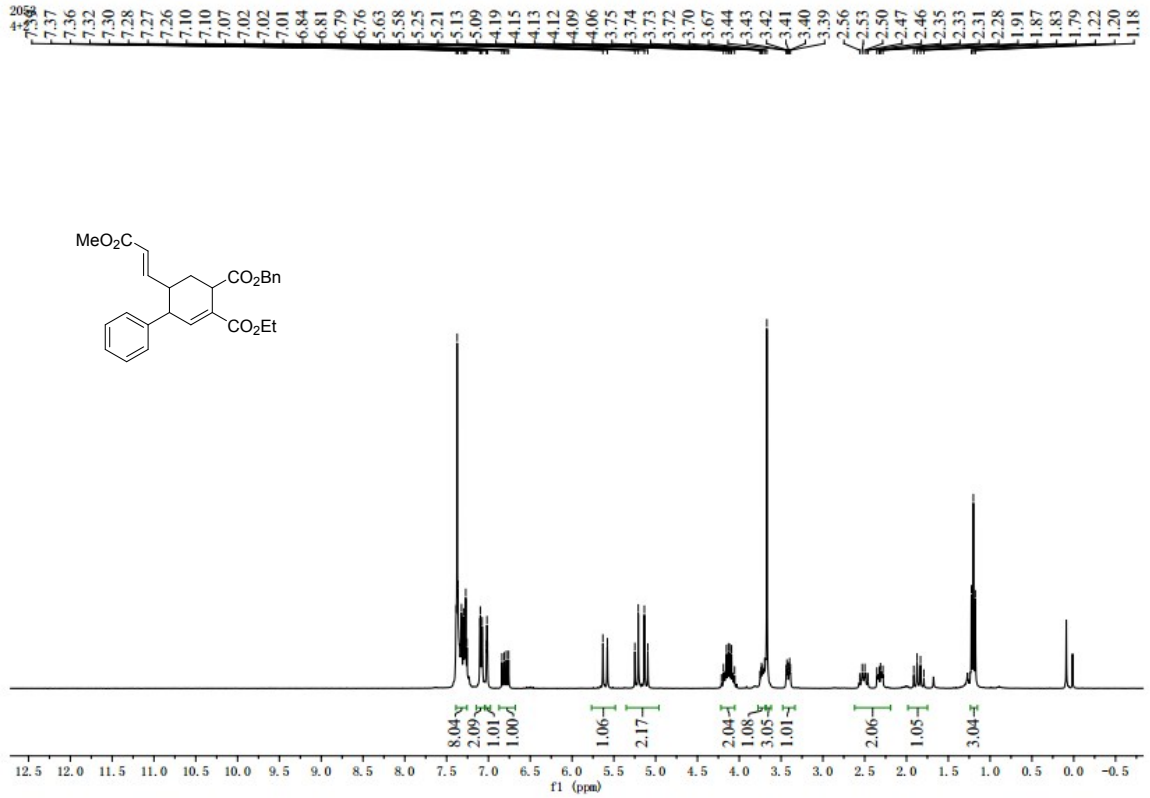

Compound 3k <sup>1</sup>H NMR

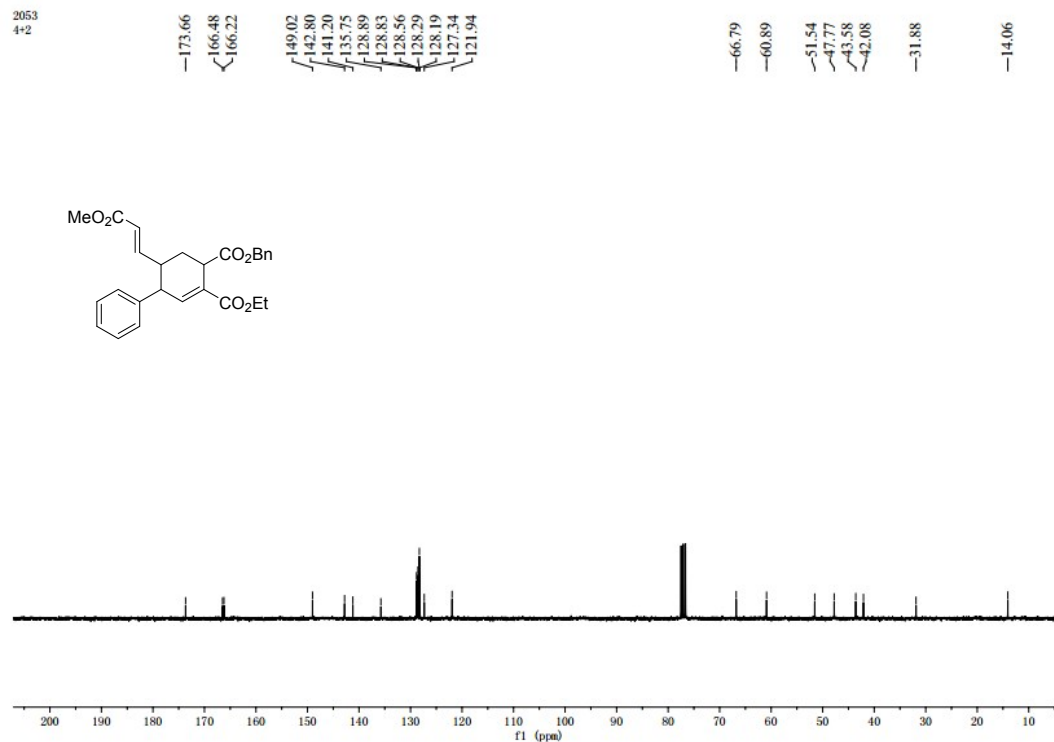

Compound 3k <sup>13</sup>C NMR

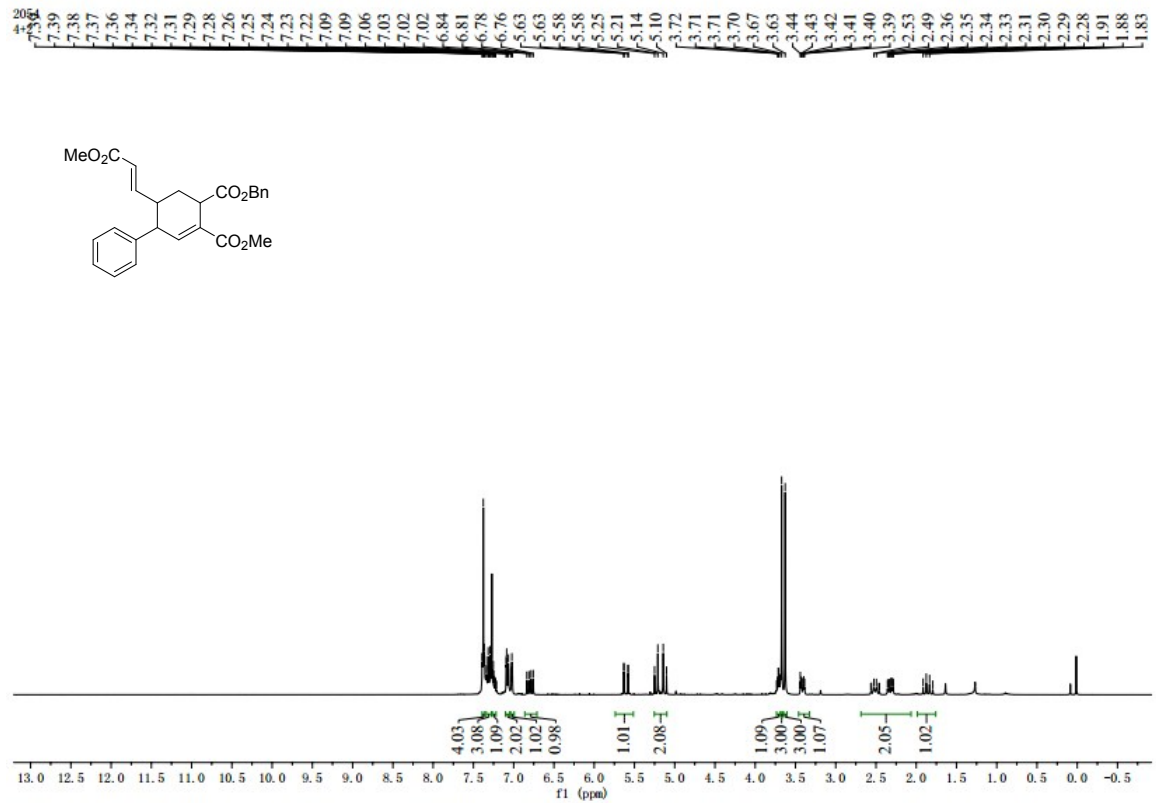

Compound 31 <sup>1</sup>H NMR

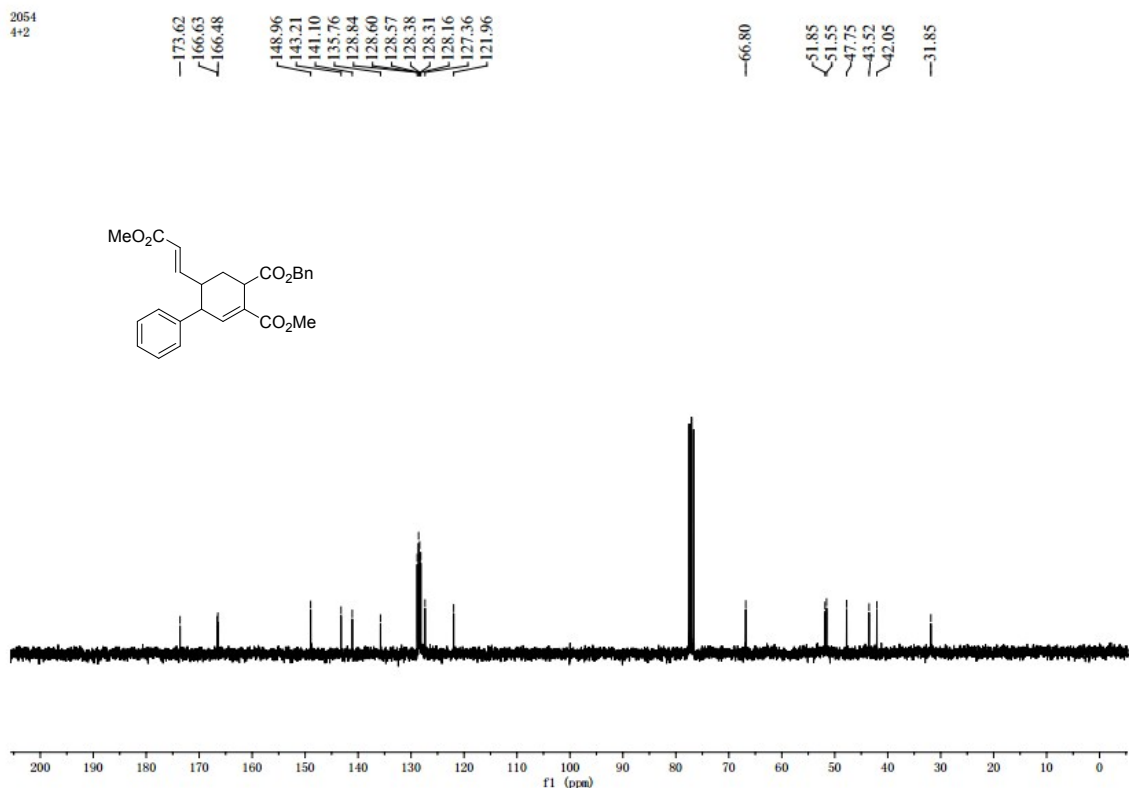

Compound 31 <sup>13</sup>C NMR

2065  
4+2

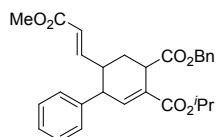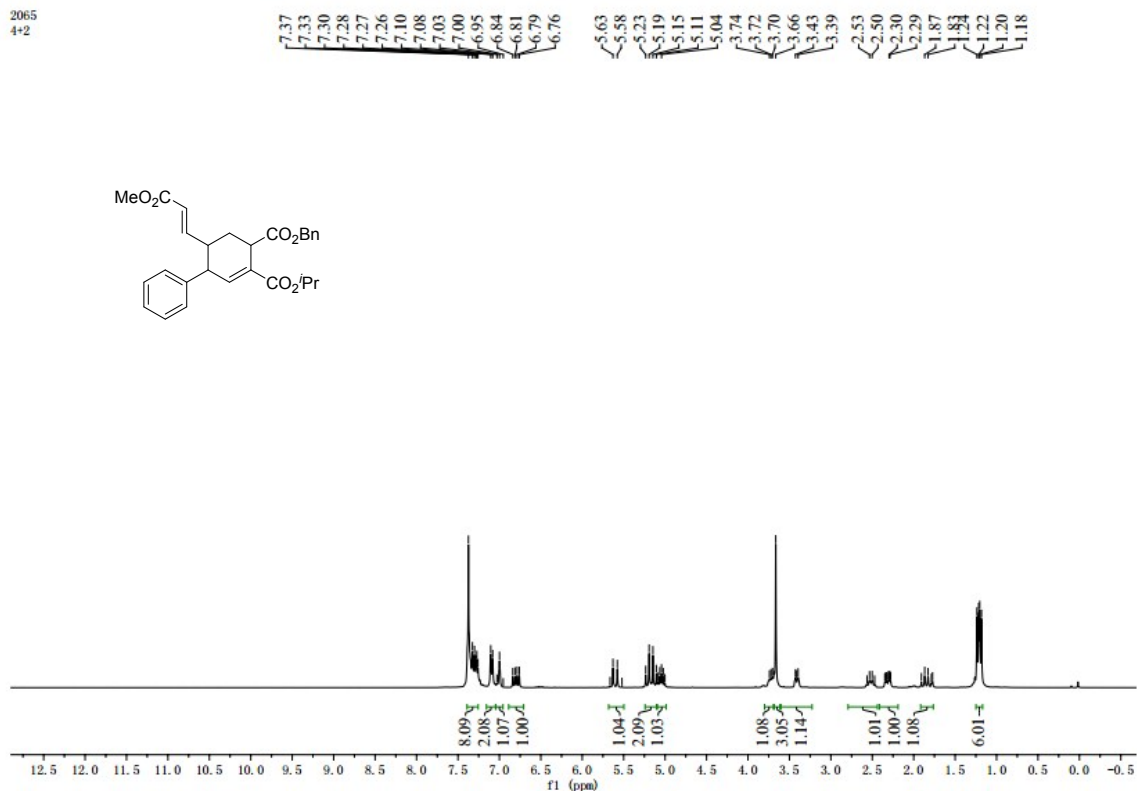

Compound 3m <sup>1</sup>H NMR

2065  
4+2

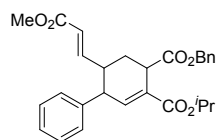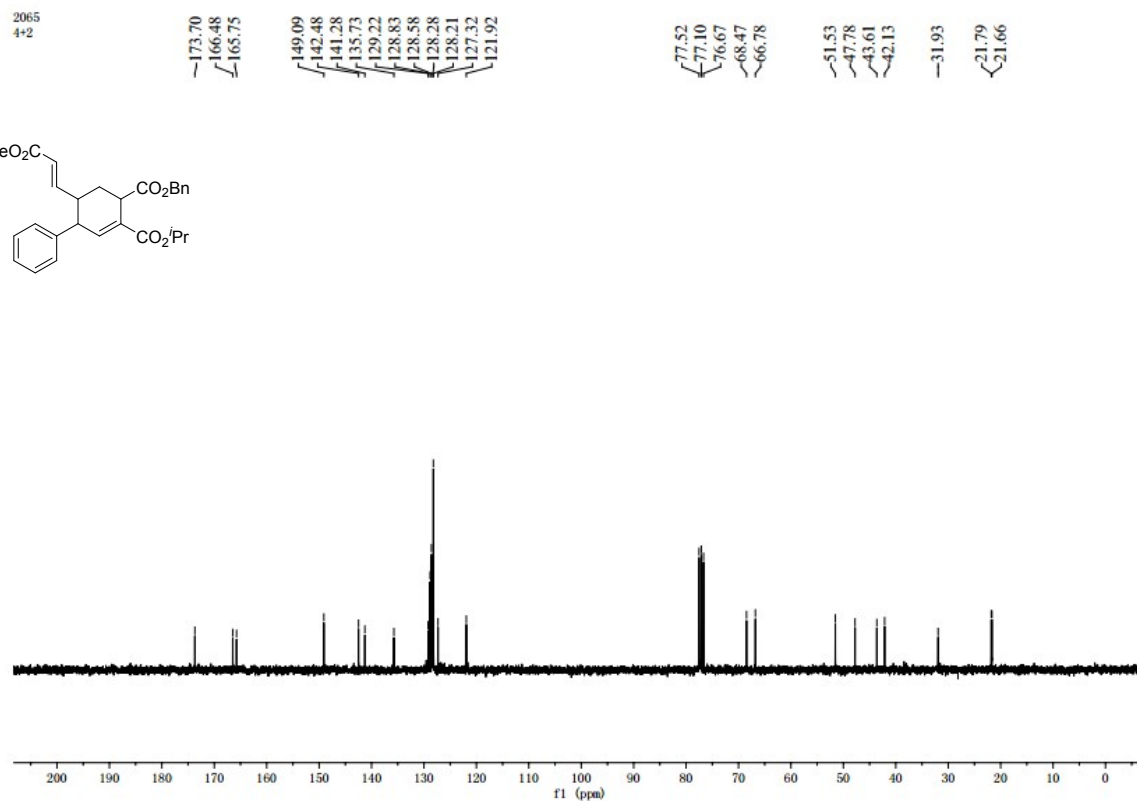

Compound 3m <sup>13</sup>C NMR



2055  
4+2

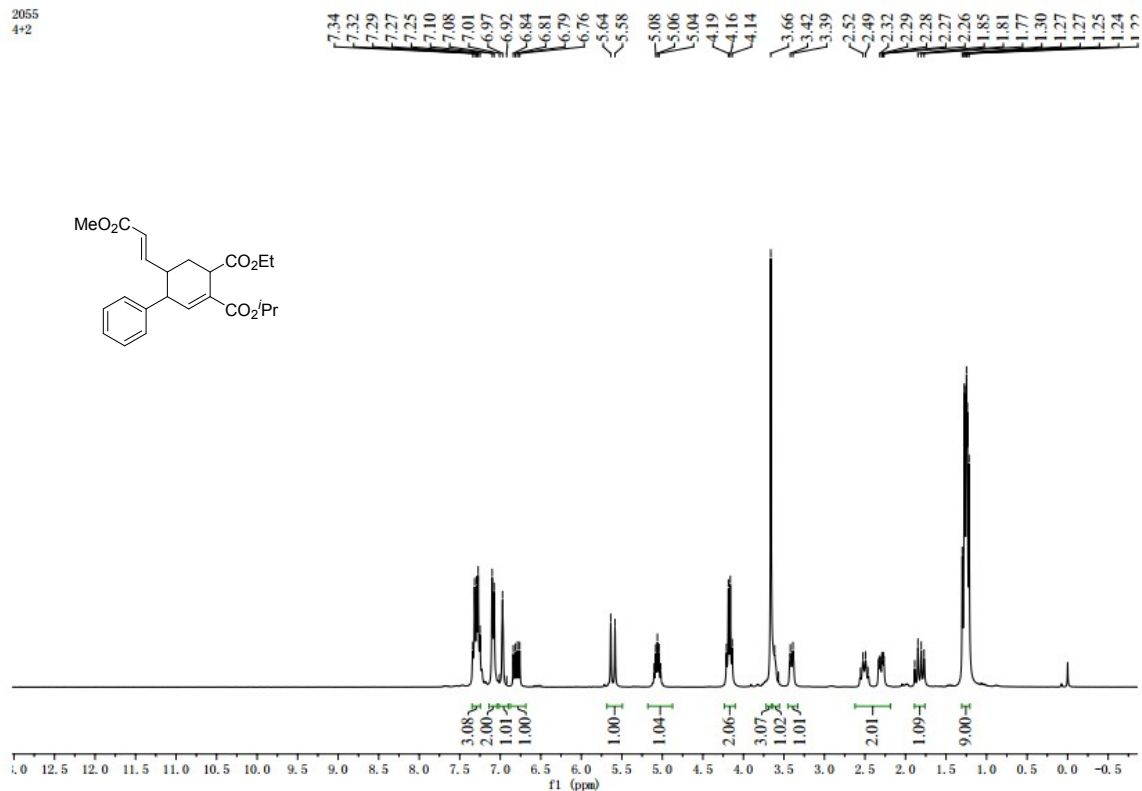

Compound 3n <sup>1</sup>H NMR

2055  
4+2

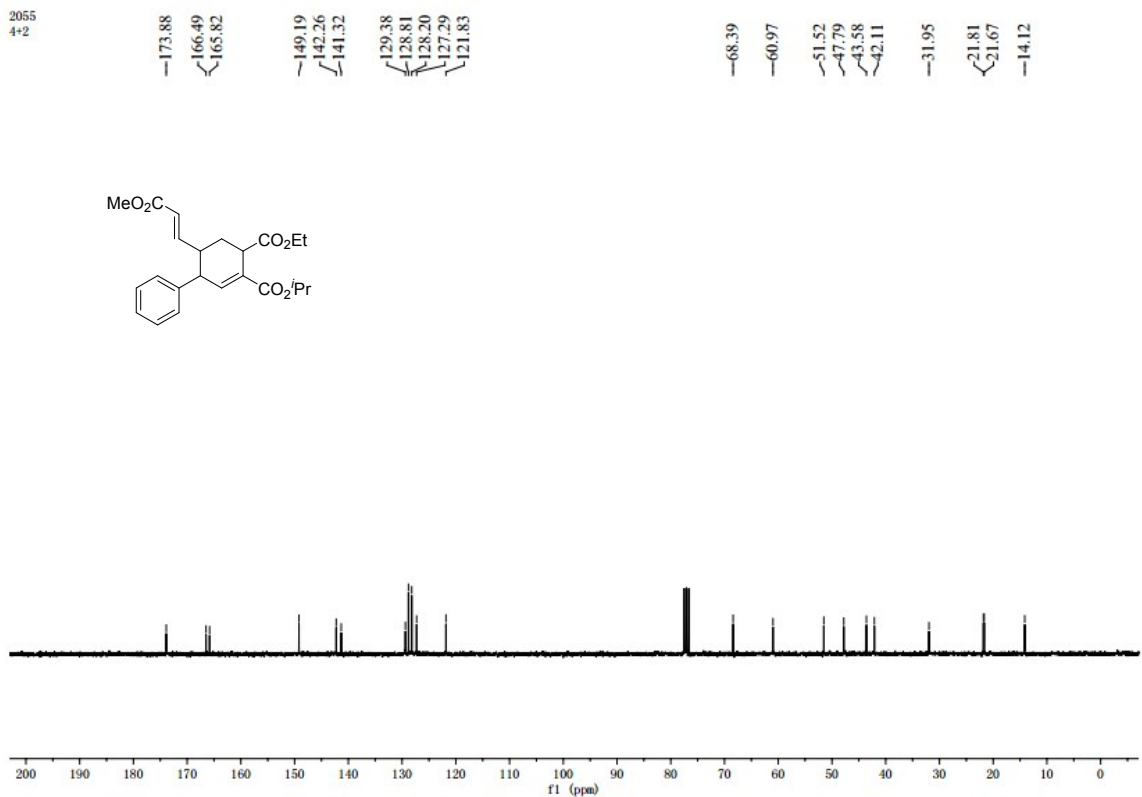

Compound 3n <sup>13</sup>C NMR

2064  
4+2

7.37  
7.32  
7.30  
7.27  
7.26  
7.10  
7.07  
7.02  
6.84  
6.81  
6.79  
6.76  
5.63  
5.57  
5.25  
5.21  
5.13  
5.09  
4.10  
4.04  
3.72  
3.70  
3.67  
3.43  
3.40  
2.52  
2.49  
2.29  
1.87  
1.83  
1.58  
1.56  
1.53  
1.38  
1.35  
1.33  
1.30  
1.28  
0.93  
0.91  
0.88

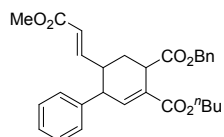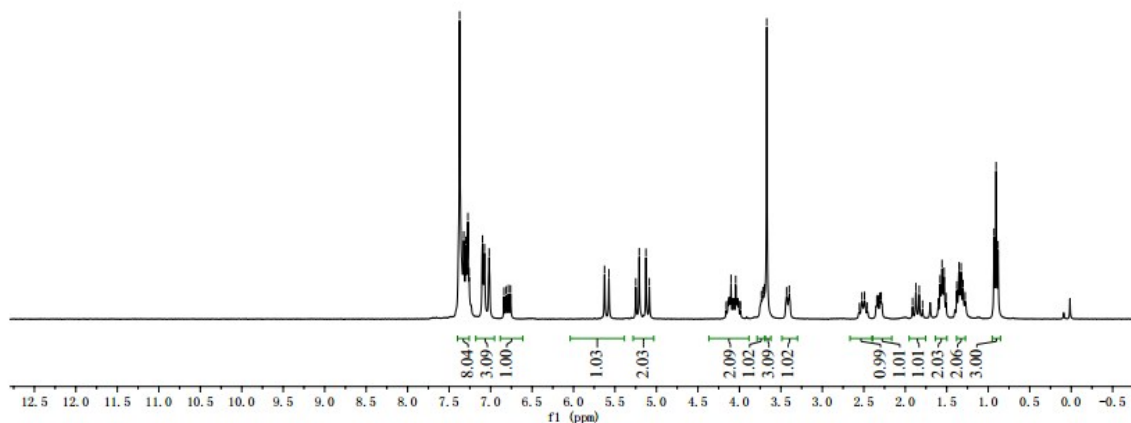

Compound 3o <sup>1</sup>H NMR

2064  
4+2

173.65  
166.49  
166.30  
149.04  
142.80  
141.22  
135.73  
128.93  
128.83  
128.57  
128.28  
128.19  
127.34  
121.94  
66.80  
64.84  
51.55  
47.76  
43.65  
42.07  
31.90  
30.52  
19.11  
13.72

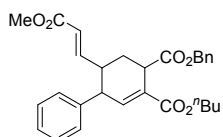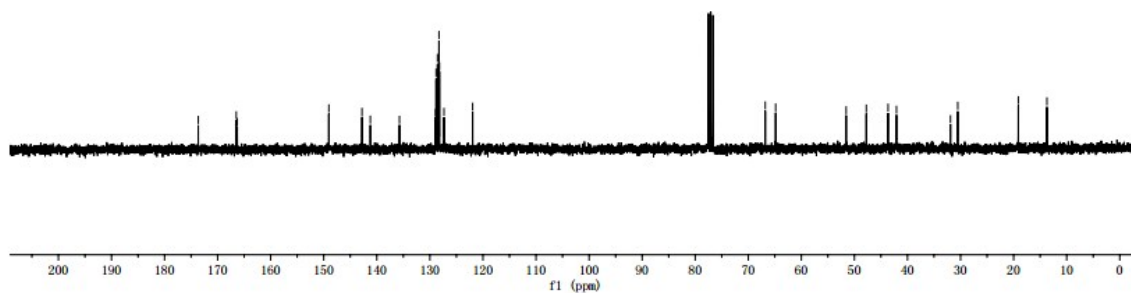

Compound 3o <sup>13</sup>C NMR

2048  
4+2

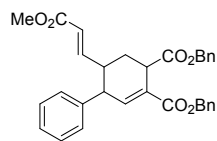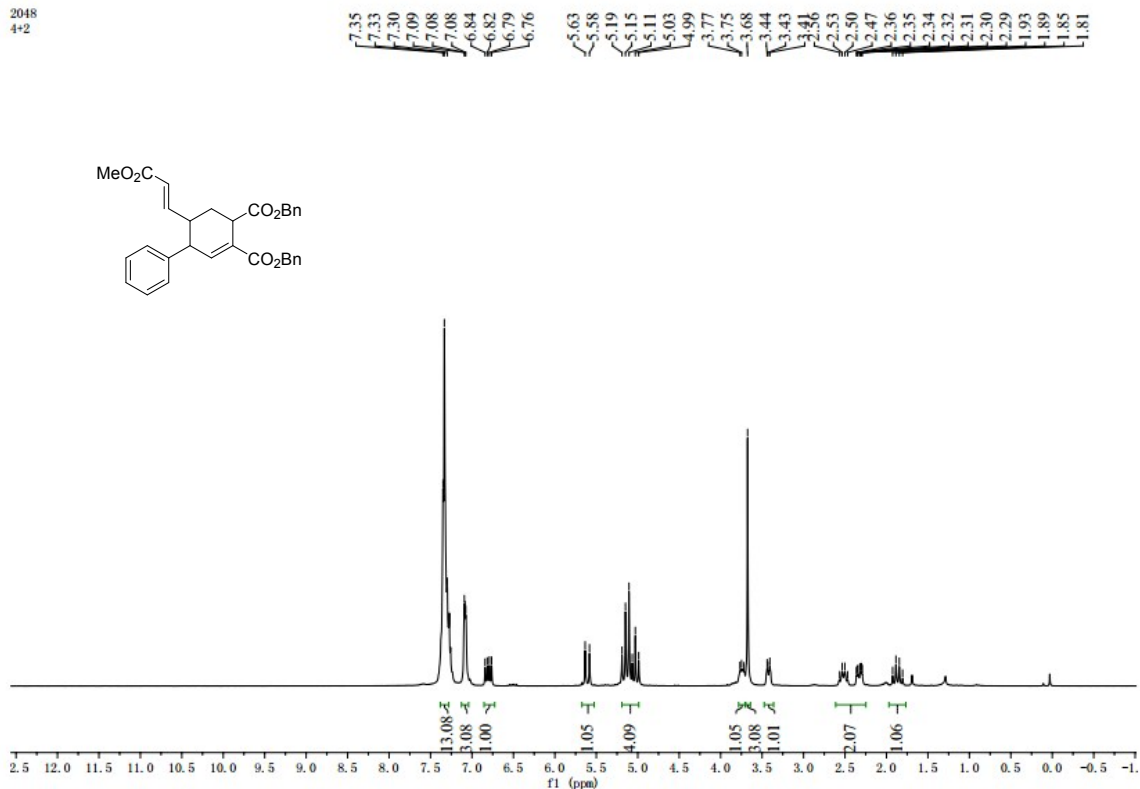

Compound 3p <sup>1</sup>H NMR

2048  
4+2

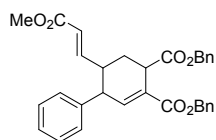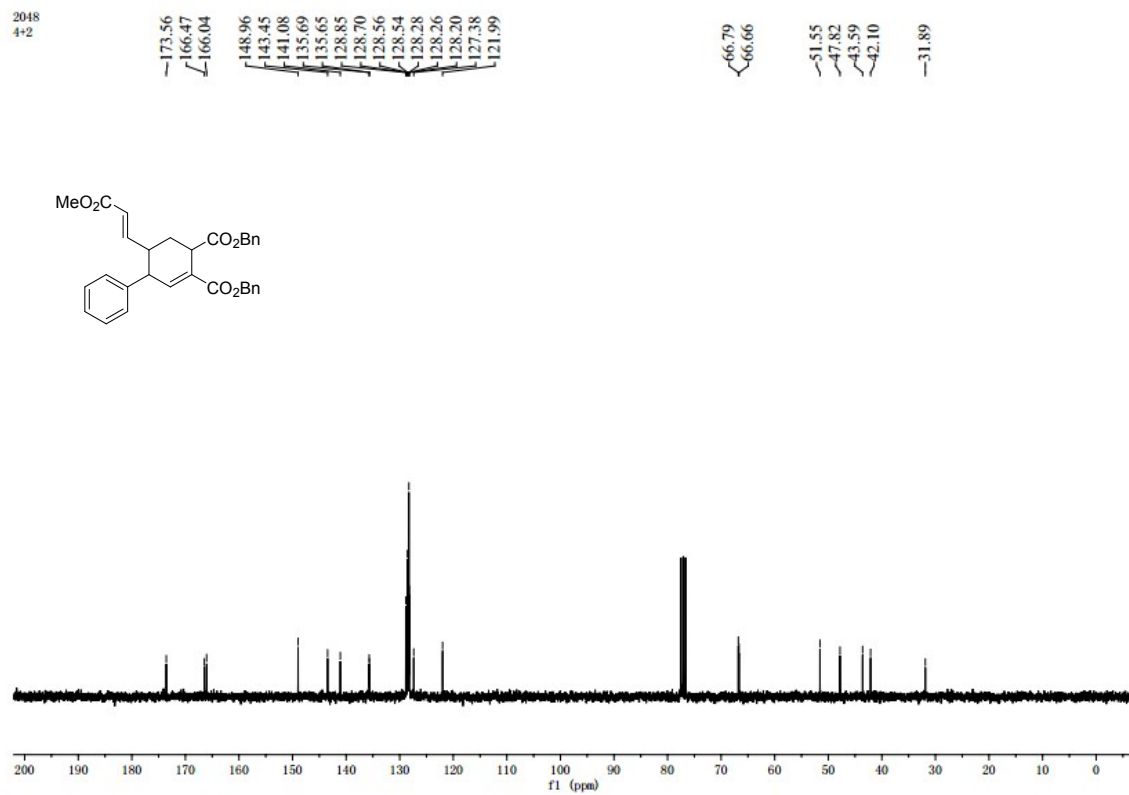

Compound 3p <sup>13</sup>C NMR

1989  
4+2

7.38  
7.37  
7.36  
7.33  
7.05  
7.03  
7.00  
6.97  
6.80  
6.77  
6.75  
6.72  
5.61  
5.56  
5.24  
5.20  
5.13  
4.16  
4.14  
4.12  
4.11  
4.08  
3.39  
2.46  
2.43  
2.35  
2.32  
2.30  
2.28  
1.90  
1.86  
1.82  
1.78  
1.76  
1.26  
1.24  
1.22  
1.19  
1.17

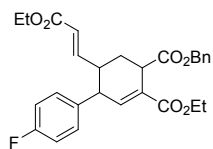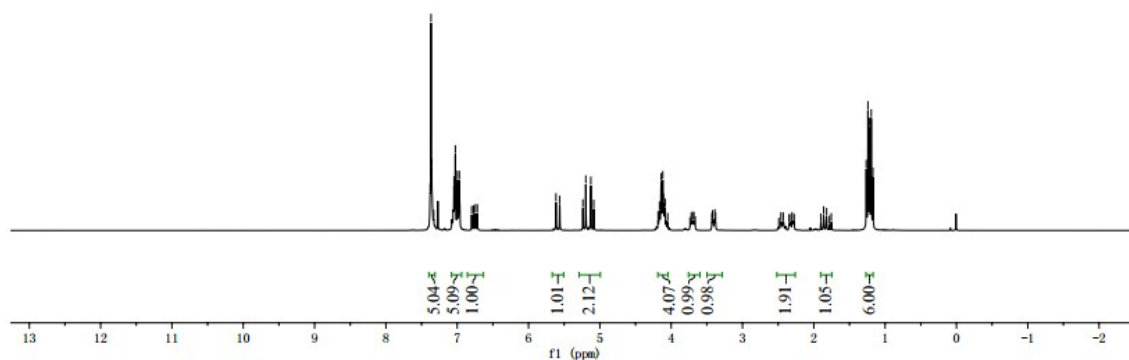

Compound 3q <sup>1</sup>H NMR

1989  
4+2

173.57  
166.14  
166.00  
163.55  
160.29  
148.40  
142.49  
137.03  
136.99  
135.70  
129.75  
129.64  
129.12  
128.57  
128.31  
122.56  
115.84  
115.56  
66.81  
60.95  
60.43  
47.00  
43.84  
42.05  
31.88  
14.17  
14.06

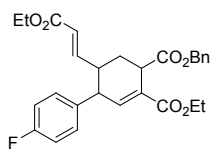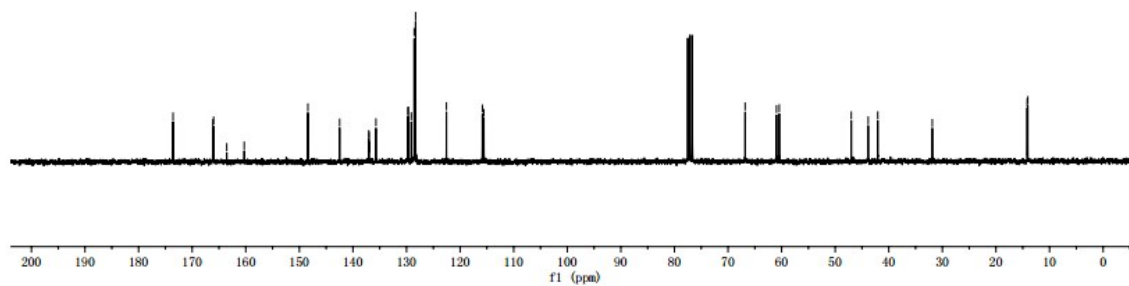

Compound 3q <sup>13</sup>C NMR

2049  
4+2

7.37  
7.33  
7.32  
7.07  
7.04  
7.03  
7.00  
6.97  
6.80  
6.78  
6.75  
6.72  
5.62  
5.56  
5.24  
5.20  
5.13  
5.09  
4.15  
4.13  
4.09  
3.72  
3.67  
3.42  
3.38  
3.36  
2.46  
2.43  
2.40  
2.34  
2.31  
2.30  
2.27  
1.90  
1.86  
1.82  
1.78

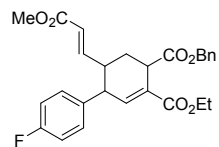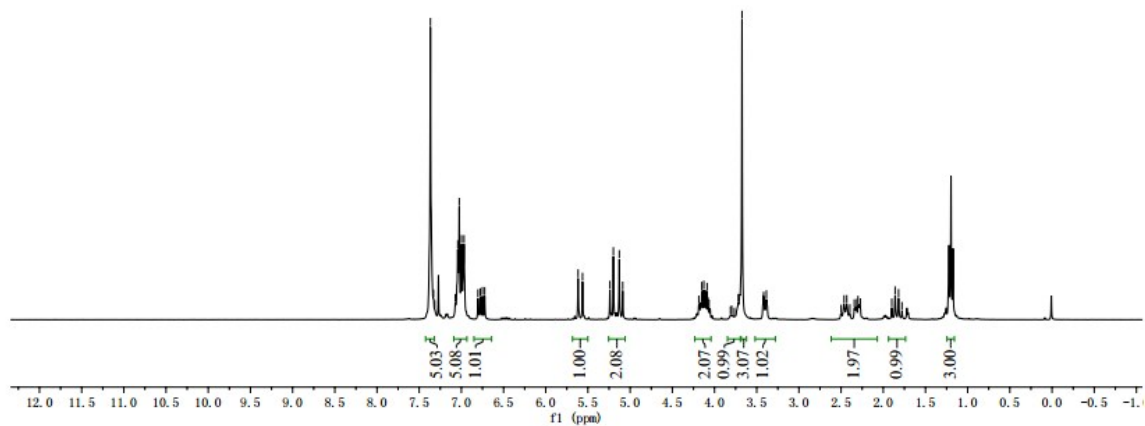

Compound 3r <sup>1</sup>H NMR

2049  
4+2

173.54  
166.39  
166.11  
163.56  
160.30  
148.70  
142.42  
136.99  
136.95  
135.70  
129.73  
129.62  
129.14  
128.57  
128.31  
128.29  
122.16  
115.85  
115.57  
66.81  
60.95  
51.58  
47.01  
43.88  
42.05  
31.87  
14.05

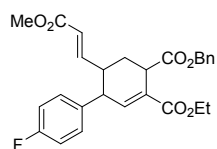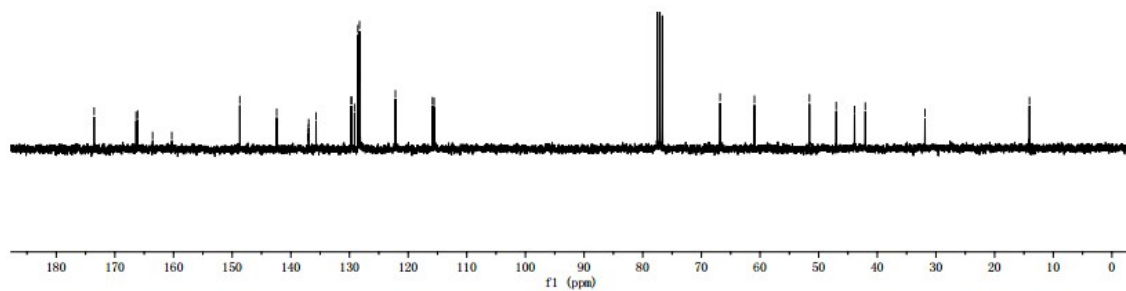

Compound 3r <sup>13</sup>C NMR

1988

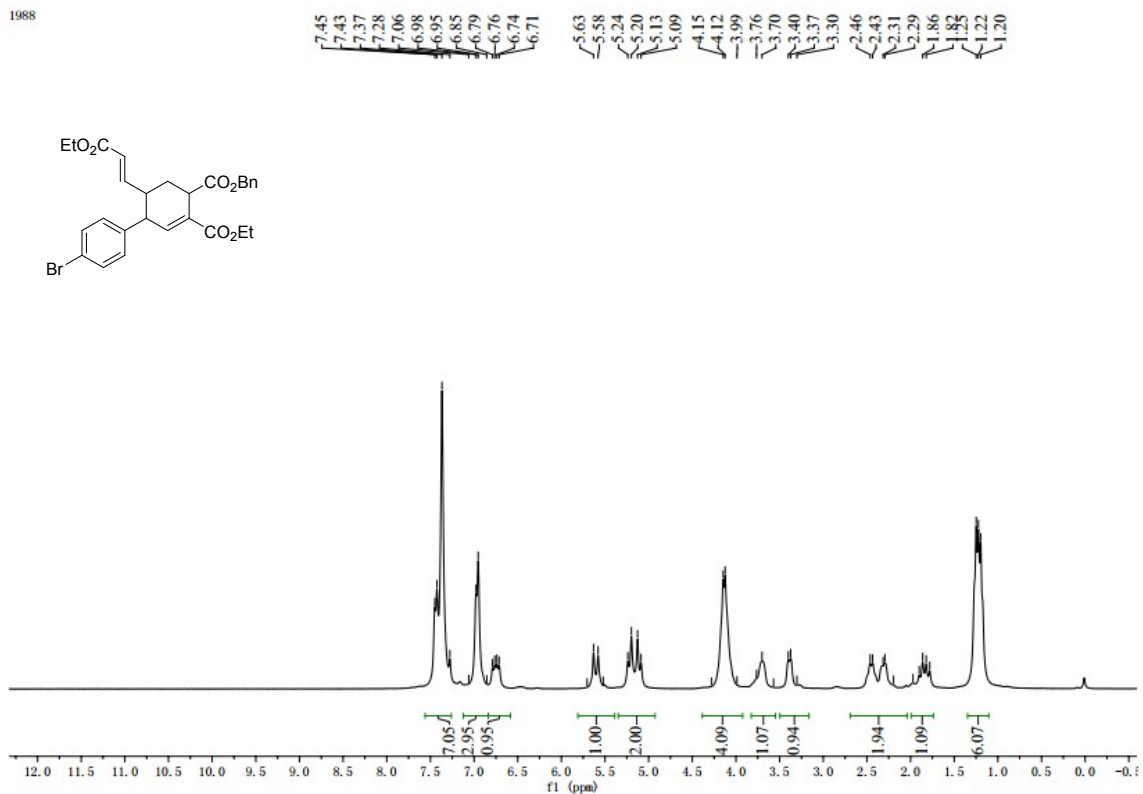Compound 3s  $^1\text{H NMR}$ 

1988

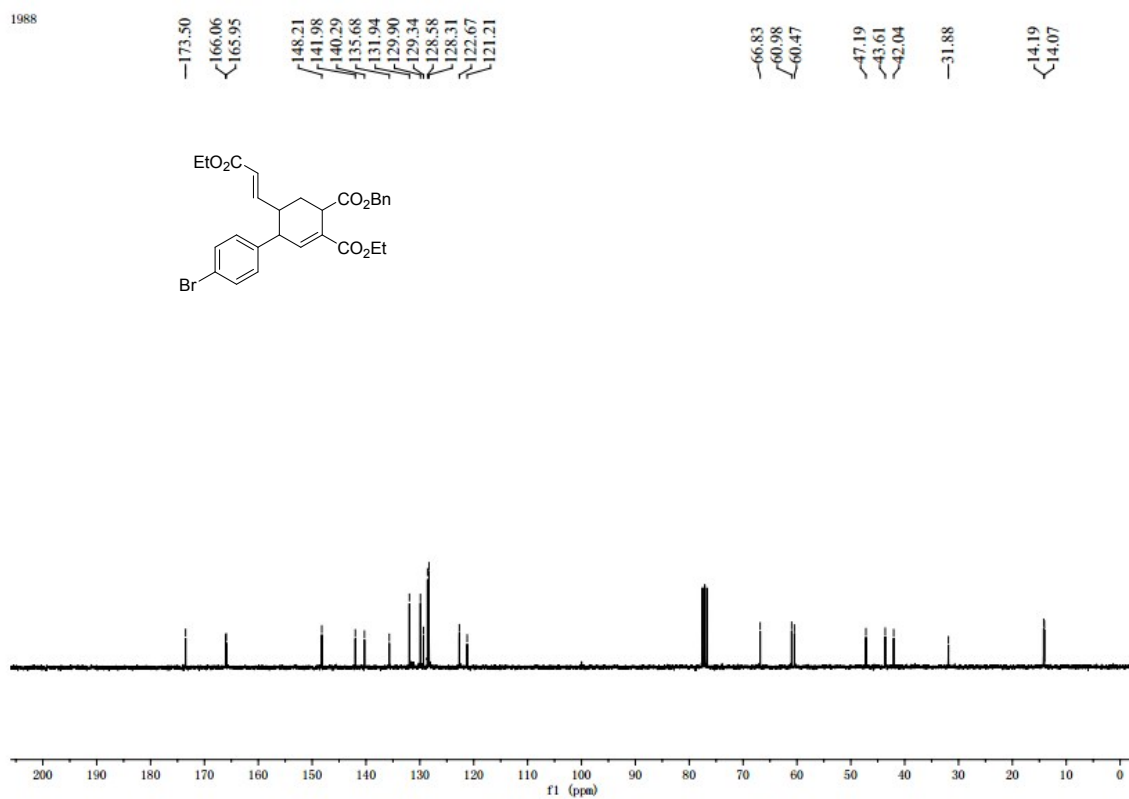Compound 3s  $^{13}\text{C NMR}$

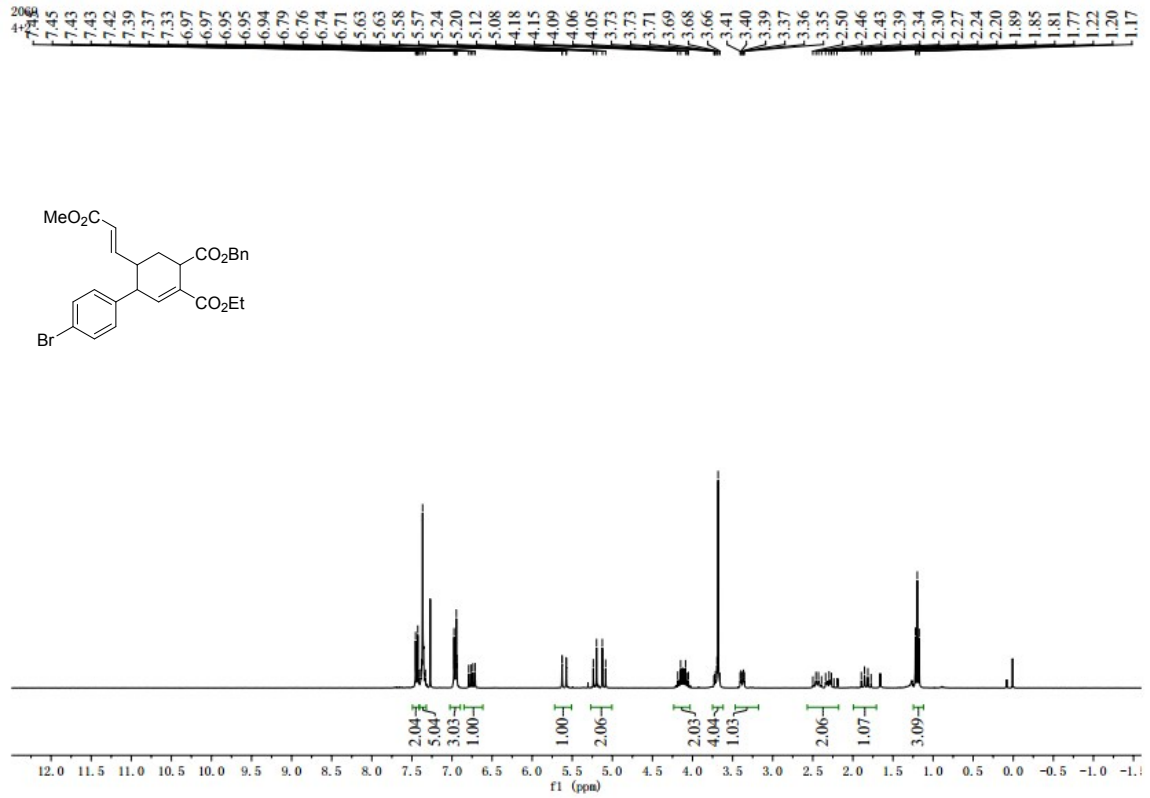

Compound 3t <sup>1</sup>H NMR

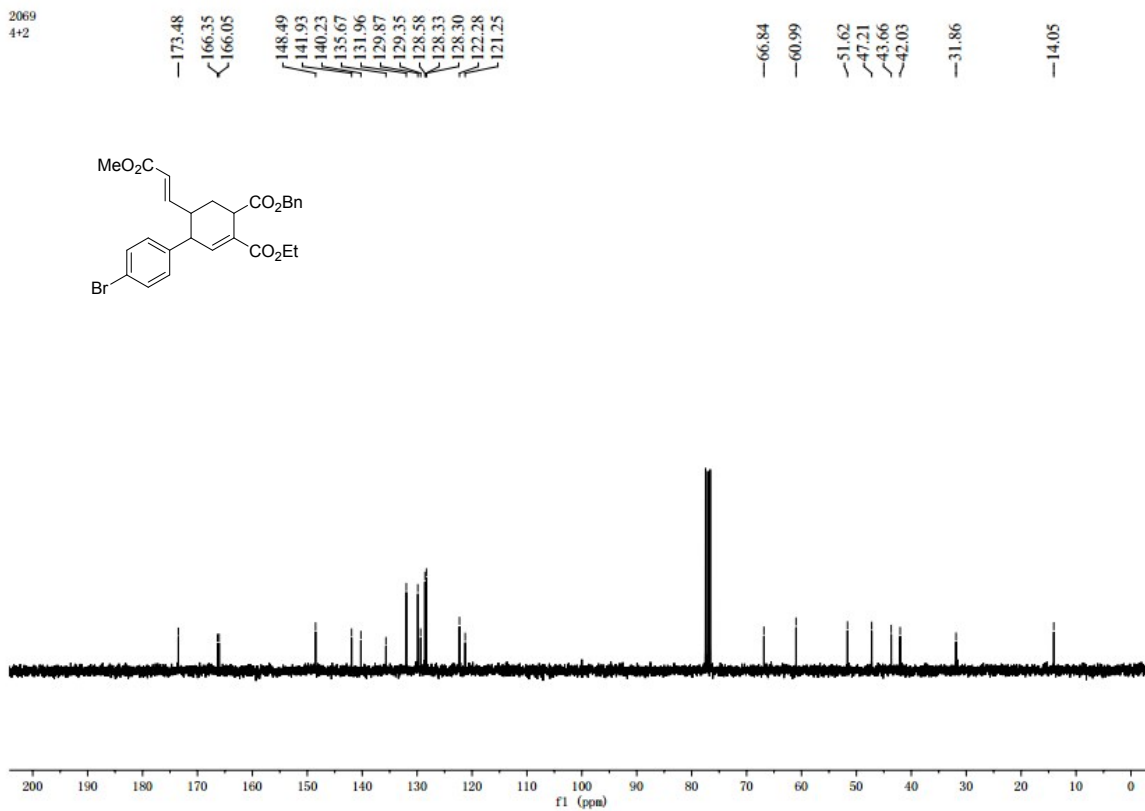

Compound 3t <sup>13</sup>C NMR

2066  
4+2

7.21  
7.19  
7.16  
7.07  
7.04  
6.99  
6.88  
6.85  
6.82  
6.79  
6.77  
5.61  
4.23  
4.21  
4.19  
4.16  
4.14  
3.73  
3.67  
3.61  
3.39  
3.35  
2.53  
2.50  
2.32  
2.28  
1.84  
1.89  
1.27  
1.25

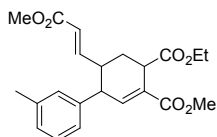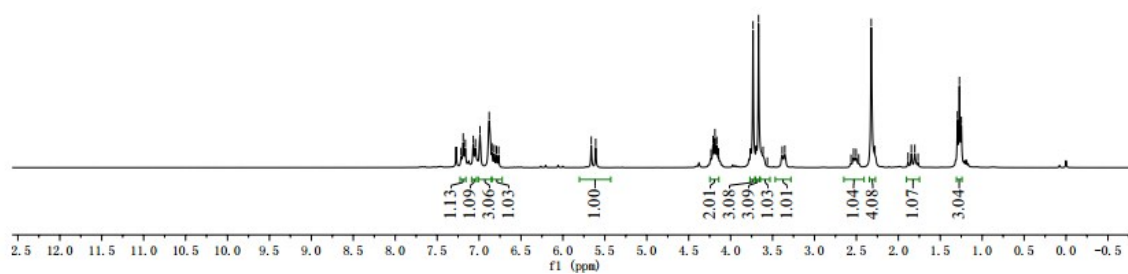

Compound 3u <sup>1</sup>H NMR

2066  
4+2

173.85  
166.78  
166.52  
149.24  
143.23  
141.08  
138.50  
128.73  
128.66  
128.58  
128.11  
125.30  
121.77  
61.00  
51.88  
51.51  
47.71  
43.26  
42.03  
31.85  
21.42  
14.15

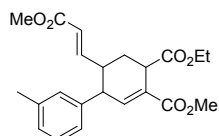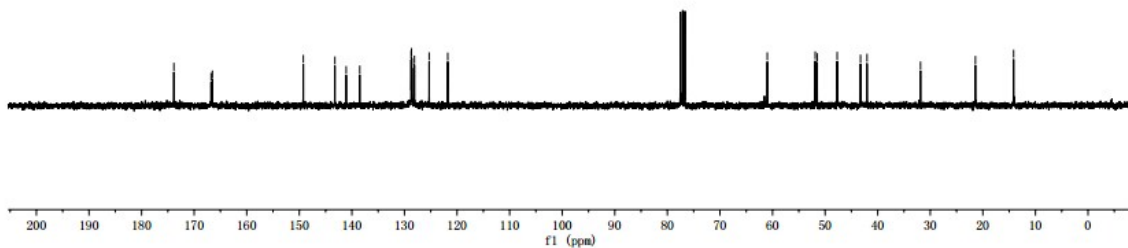

Compound 3u <sup>13</sup>C NMR



2057  
4+2

7.13  
7.10  
6.99  
6.98  
6.95  
6.84  
6.82  
6.79  
6.76  
5.66  
5.60  
4.21  
4.18  
4.16  
3.73  
3.67  
3.64  
3.62  
3.60  
3.39  
3.35  
2.51  
2.48  
2.45  
2.32  
2.29  
2.28  
2.27  
2.26  
1.88  
1.84  
1.80  
1.76  
1.29  
1.27  
1.25

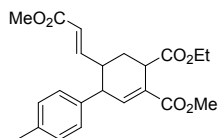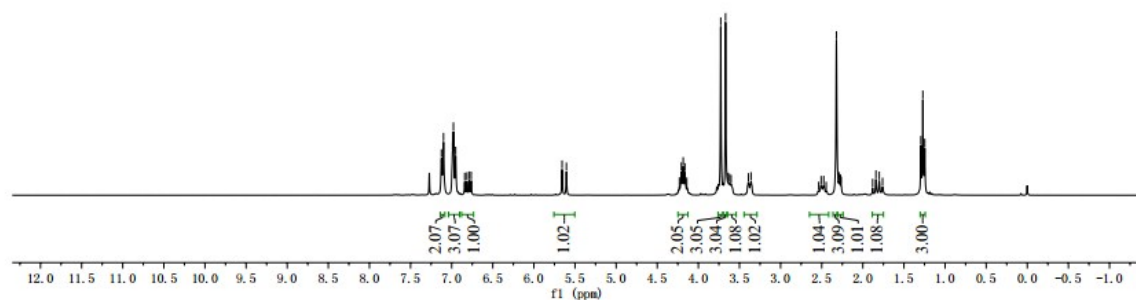

Compound 3v <sup>1</sup>H NMR

2057  
4+2

173.86  
166.76  
166.52  
149.26  
143.37  
138.13  
136.94  
129.50  
128.57  
128.00  
121.79  
60.99  
51.87  
51.52  
47.36  
43.44  
42.04  
31.90  
21.04  
14.15

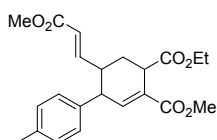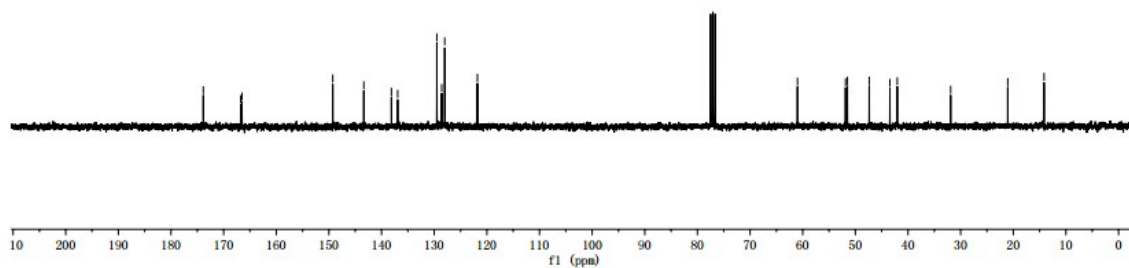

Compound 3v <sup>13</sup>C NMR

2050  
4+2

7.45  
7.43  
7.39  
6.98  
6.95  
6.93  
6.80  
6.77  
6.75  
6.72  
5.64  
5.59  
4.23  
4.21  
4.19  
4.17  
4.16  
4.15  
3.68  
3.62  
3.40  
3.37  
2.46  
2.43  
2.39  
2.33  
2.31  
2.27  
2.26  
1.88  
1.84  
1.80  
1.76  
1.29  
1.27  
1.26  
1.25  
1.24

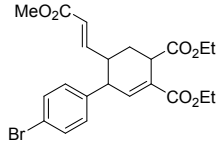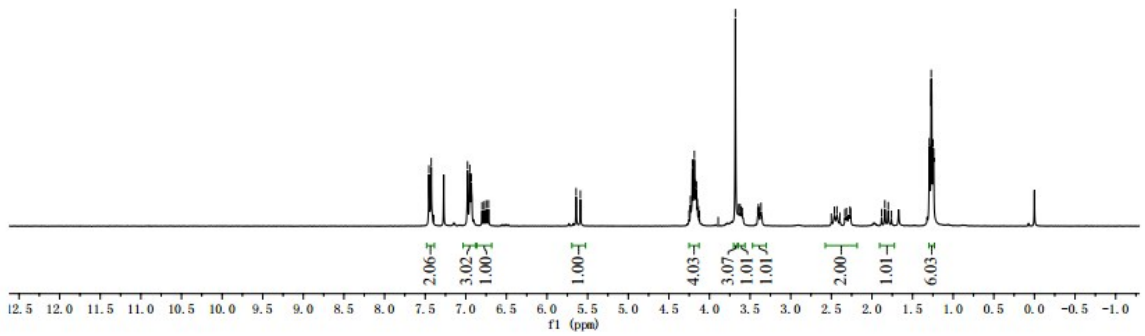

Compound 3w <sup>1</sup>H NMR

2050  
4+2

173.69  
166.35  
166.12  
148.59  
141.75  
140.30  
131.95  
129.87  
129.53  
122.21  
121.22  
61.05  
60.95  
51.60  
47.24  
43.64  
42.03  
31.90  
14.12

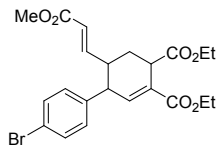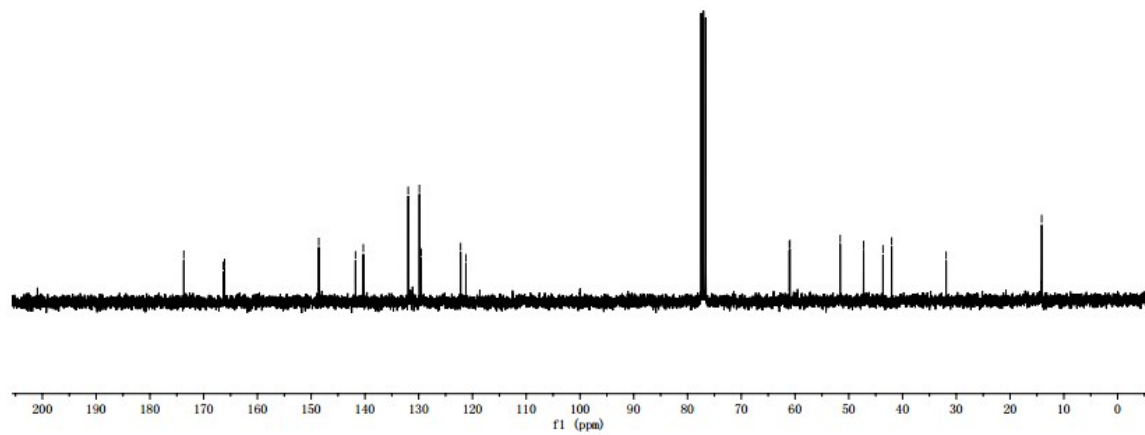

Compound 3w <sup>13</sup>C NMR

1861  
4+2

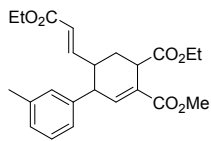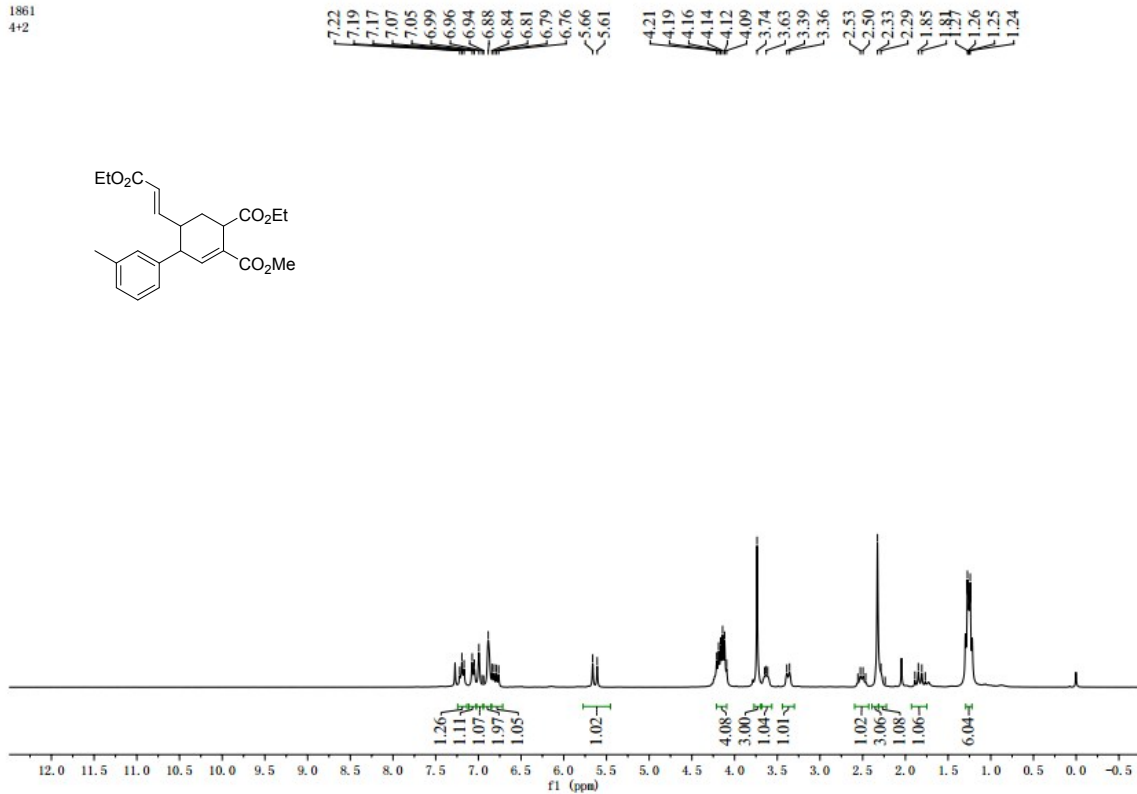

Compound 3x <sup>1</sup>H NMR

1861  
4+2

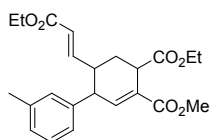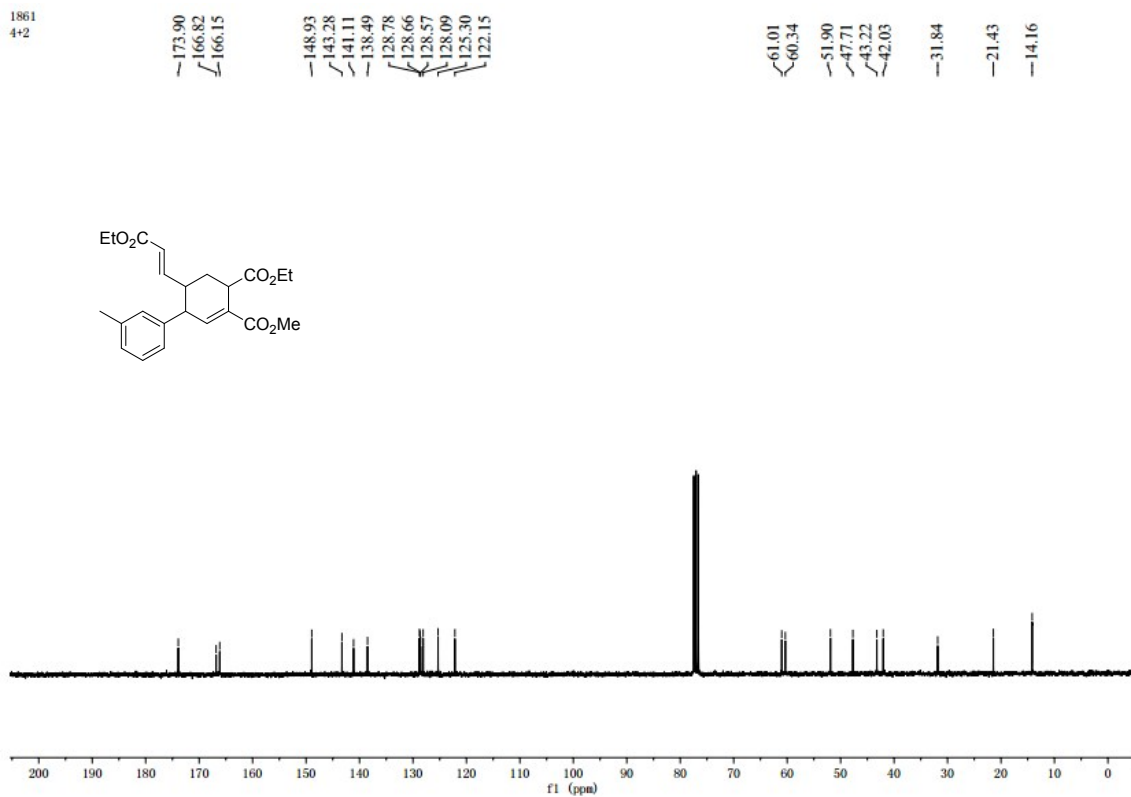

Compound 3x <sup>13</sup>C NMR

1849  
dierdai4+2

7.13  
7.11  
7.04  
6.99  
6.96  
6.93  
6.90  
6.84  
6.81  
6.79  
6.76  
6.67  
5.66  
5.61  
4.21  
4.19  
4.17  
4.14  
4.12  
4.10  
3.74  
3.62  
3.40  
3.37  
2.33  
2.30  
2.29  
2.28  
1.85  
1.80  
1.27  
1.25  
1.22

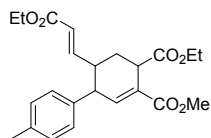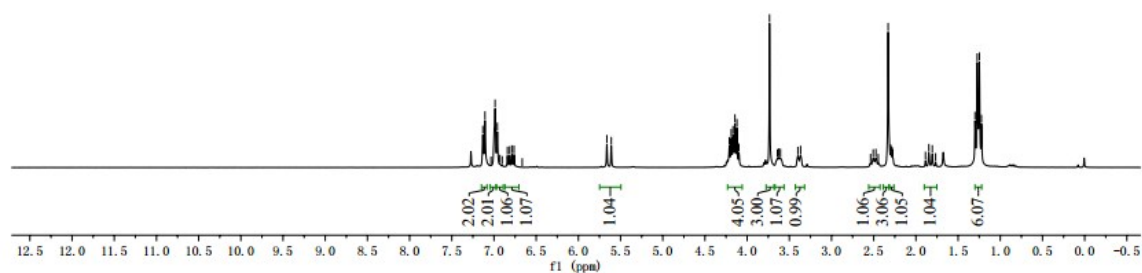

Compound 3y <sup>1</sup>H NMR

1849  
dierdai4+2

173.9  
166.8  
166.1  
149.0  
143.4  
138.2  
136.9  
129.5  
128.6  
128.0  
122.2  
61.0  
60.3  
51.9  
47.4  
43.4  
42.0  
31.9  
21.1  
14.2  
14.2

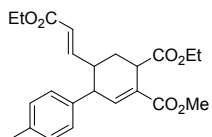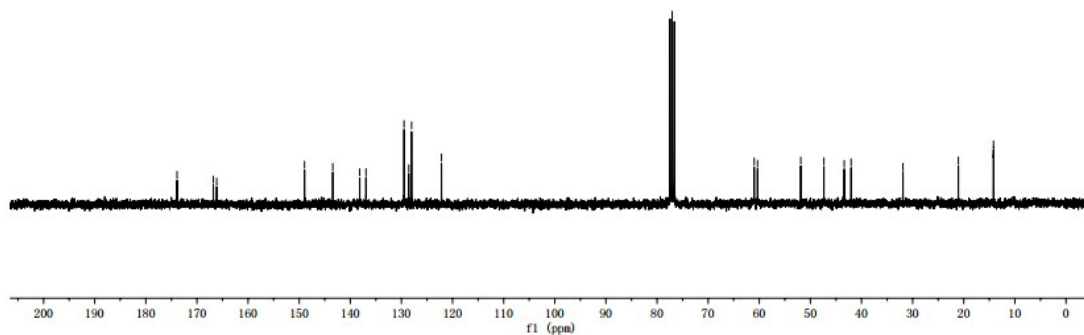

Compound 3y <sup>13</sup>C NMR

940

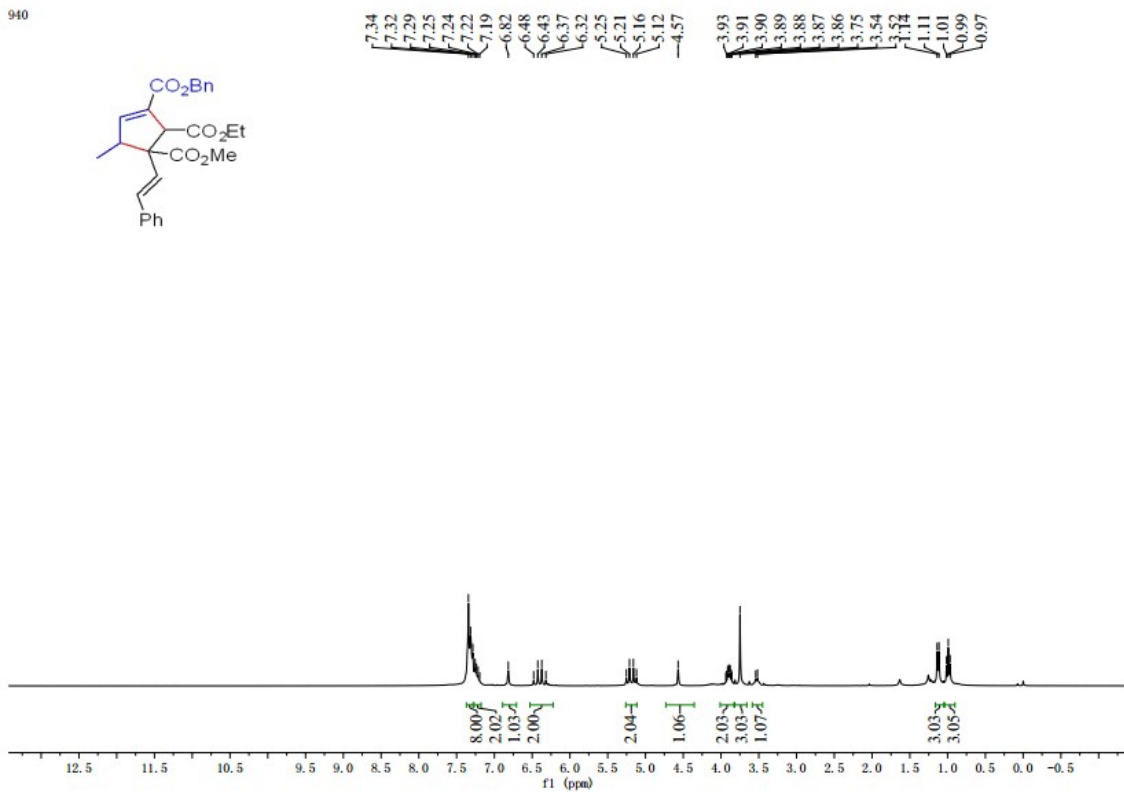Compound 4a  $^1\text{H NMR}$ 

940

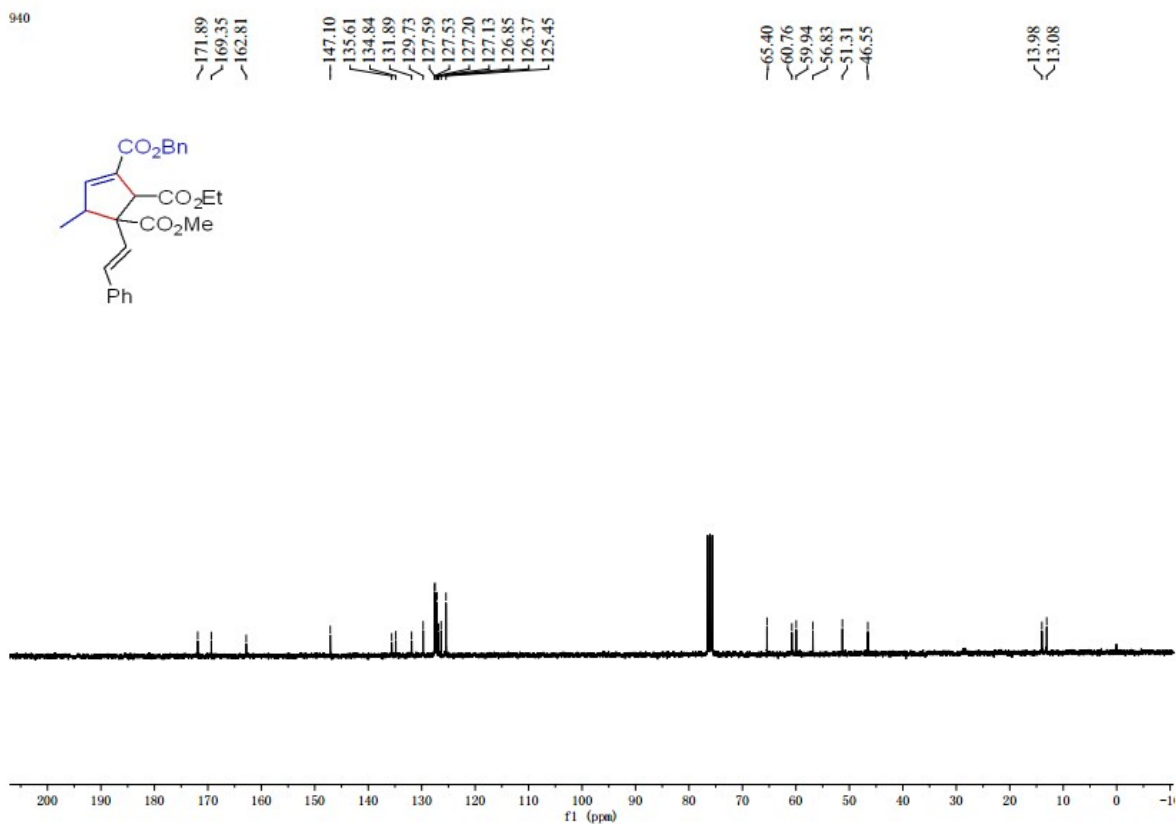Compound 4a  $^{13}\text{C NMR}$

1852  
1

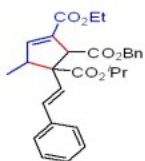

7.35  
7.34  
7.27  
7.26  
7.23  
7.17  
6.79  
6.38  
6.33  
6.28  
6.23  
5.14  
5.05  
5.03  
4.65  
4.20  
4.18  
4.16  
3.56  
3.54  
3.51  
3.49  
1.28  
1.26  
1.24  
1.22

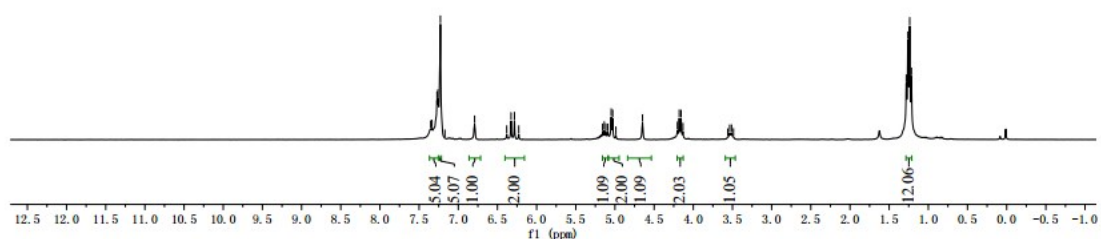

Compound 4b <sup>1</sup>H NMR

1852  
1

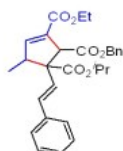

172.98  
171.02  
164.02  
148.10  
136.64  
135.66  
132.61  
131.82  
128.55  
128.35  
128.32  
128.01  
127.76  
126.37  
125.57  
69.27  
66.73  
61.64  
60.67  
57.26  
47.85  
21.63  
15.15  
14.14

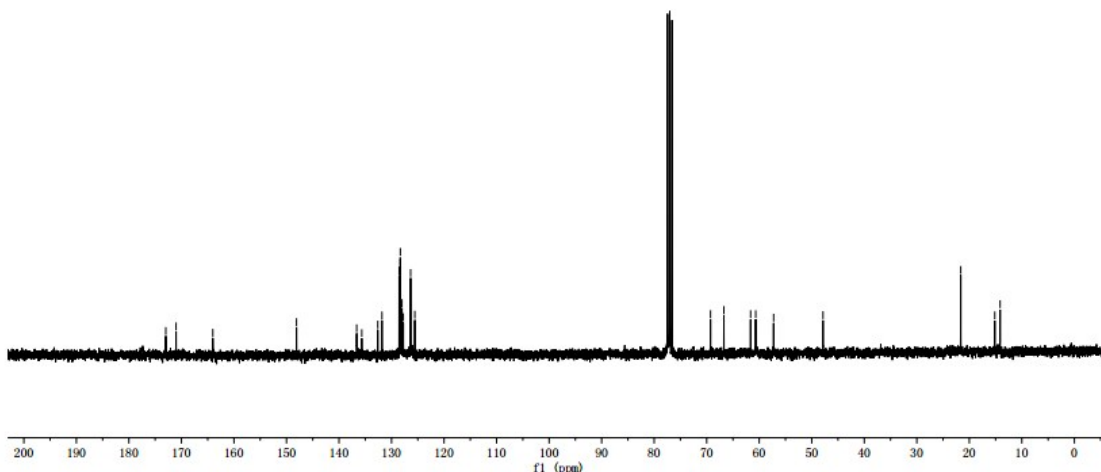

Compound 4b <sup>13</sup>C NMR

1863  
3+2

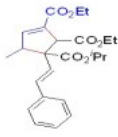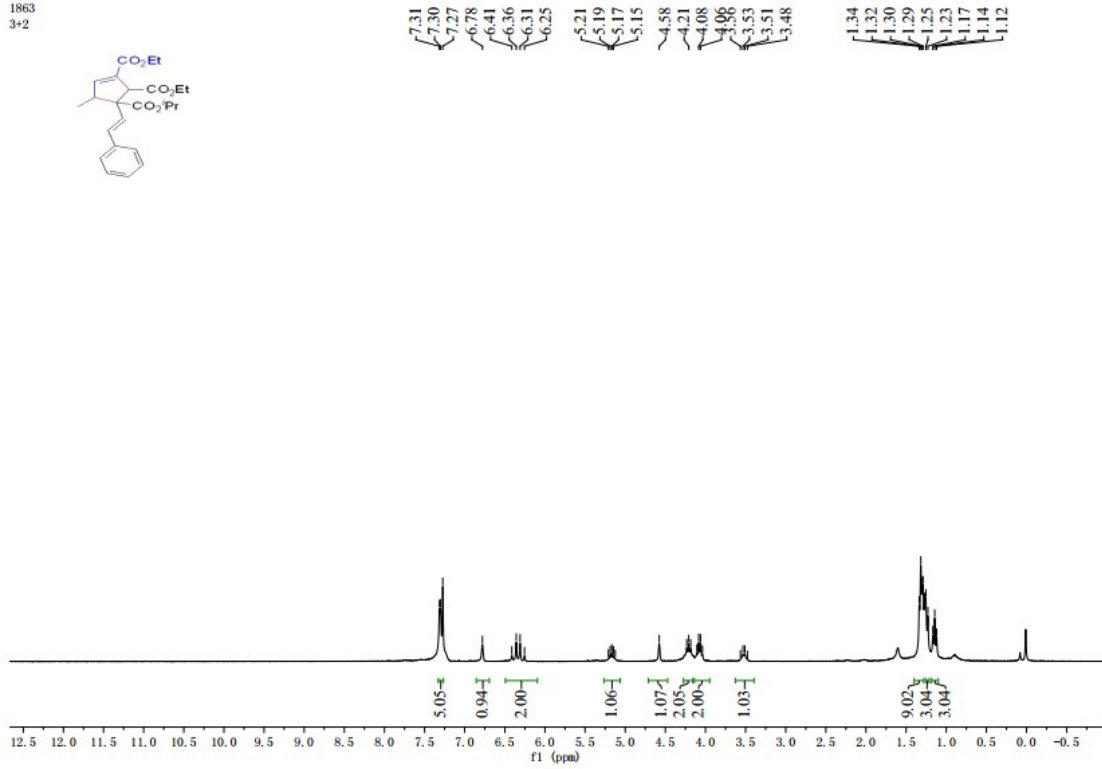

Compound 4c <sup>1</sup>H NMR

1863  
3+2

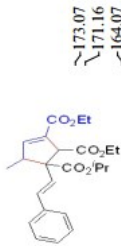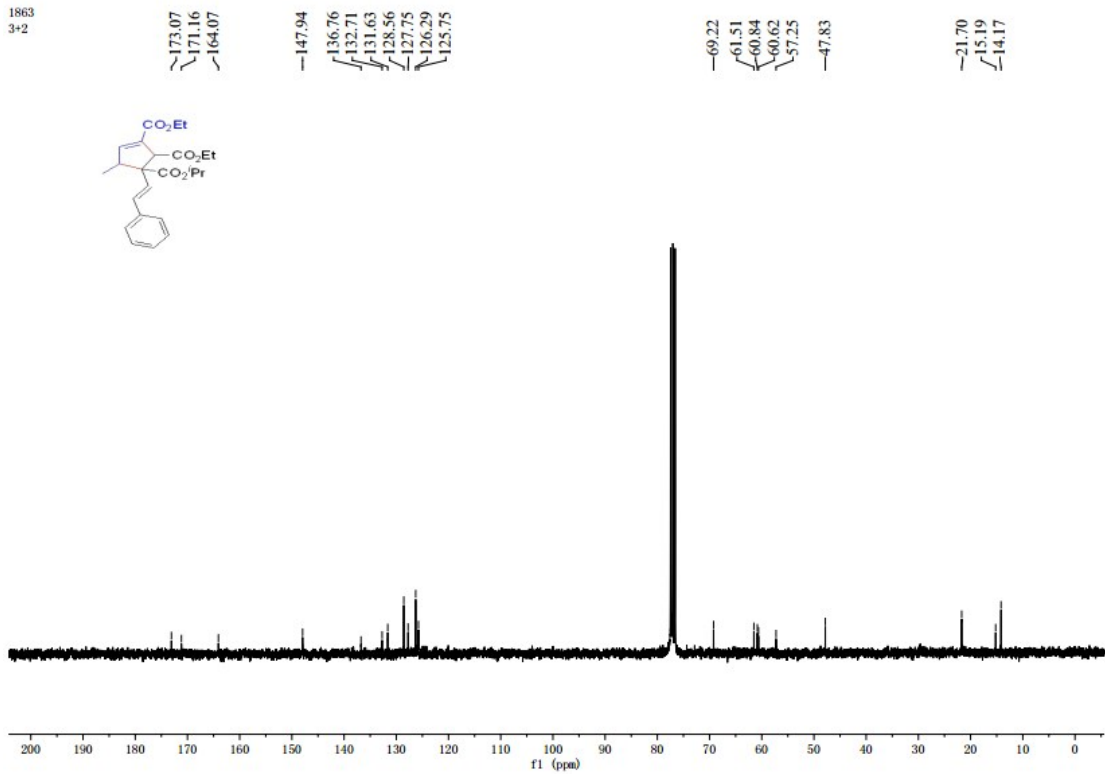

Compound 4c <sup>13</sup>C NMR

2048  
3+2

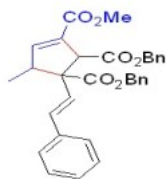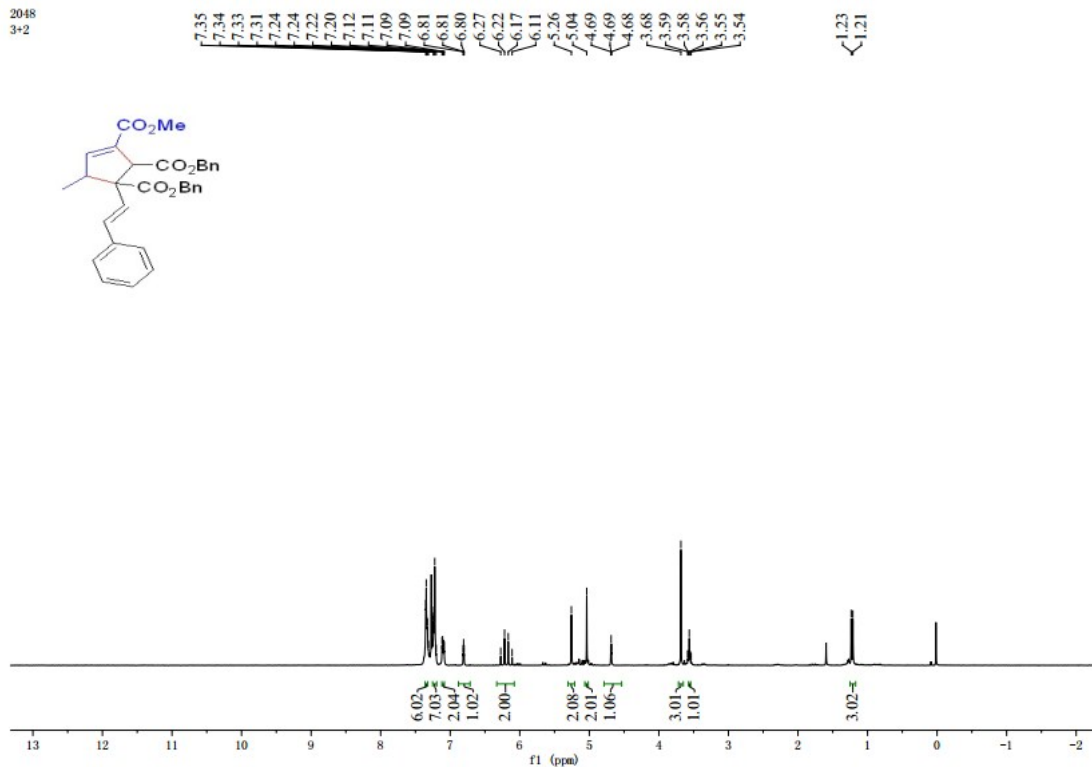

Compound 4d <sup>1</sup>H NMR

2048  
3+2

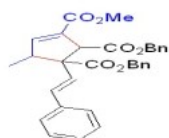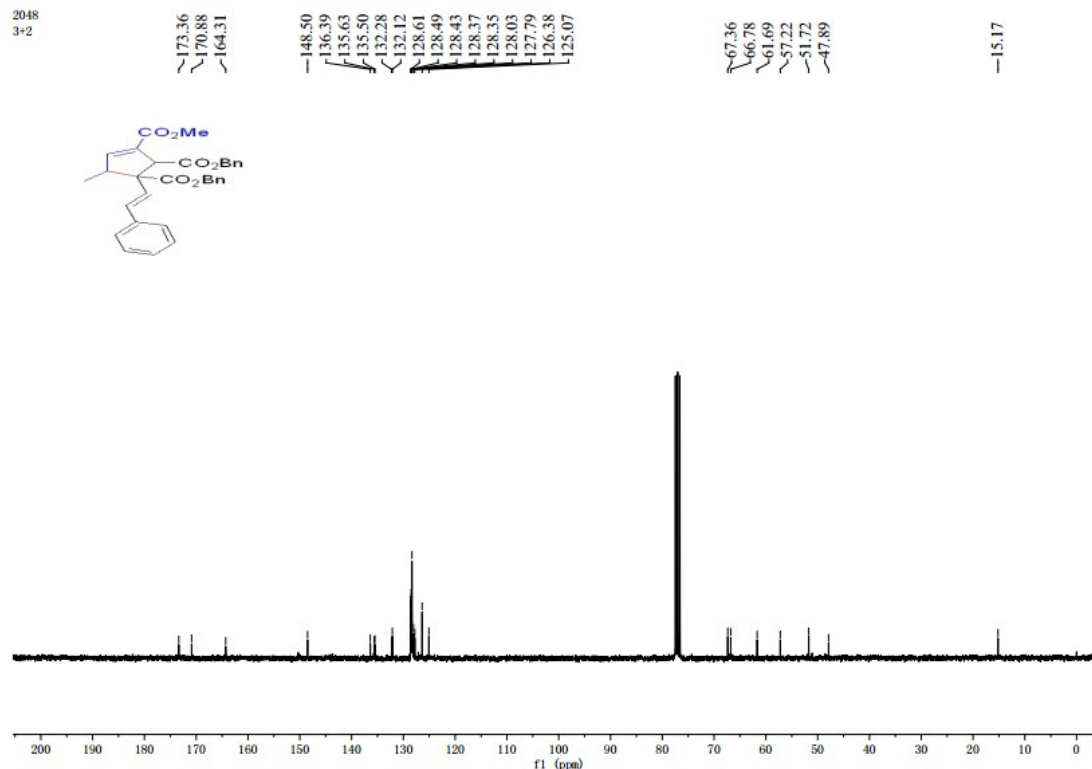

Compound 4d <sup>13</sup>C NMR



1838

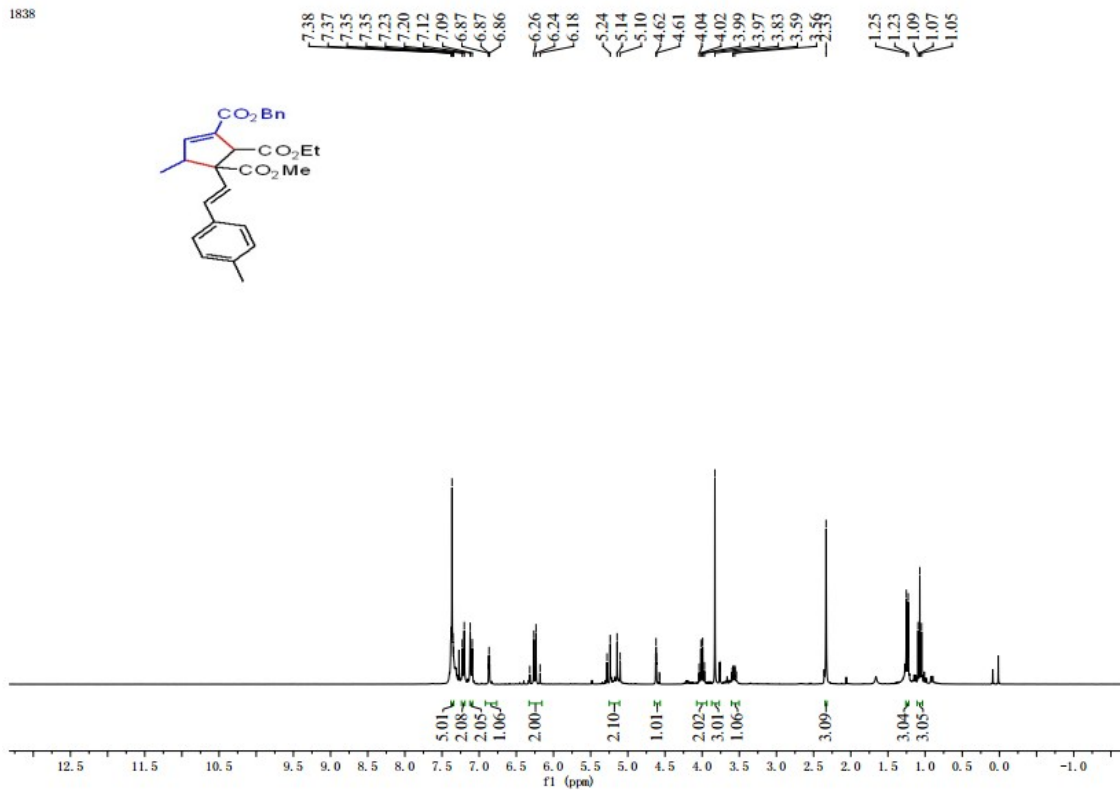Compound 4e <sup>1</sup>H NMR

1838

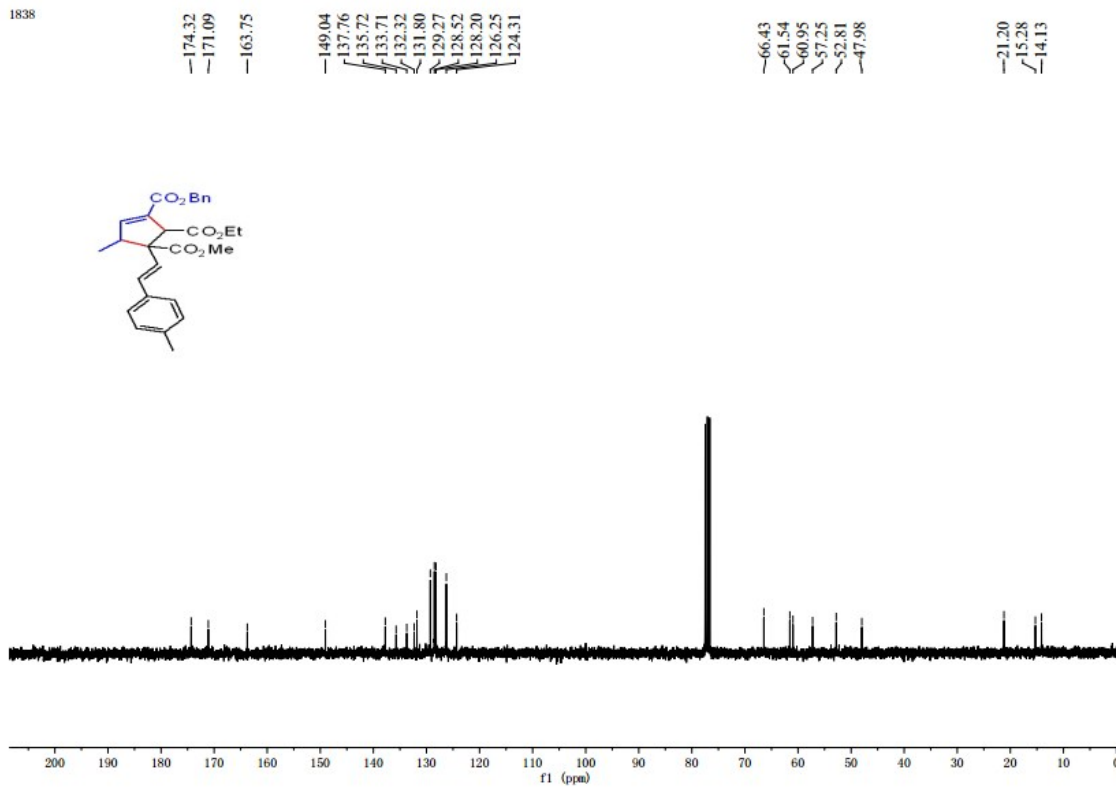Compound 4e <sup>13</sup>C NMR



1861  
3+2

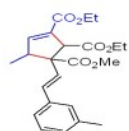

7.22  
7.19  
7.17  
7.13  
7.11  
7.07  
7.05  
6.81  
6.40  
6.37  
6.27  
4.59  
4.55  
4.23  
4.21  
4.18  
4.13  
4.11  
4.08  
4.06  
3.83  
3.58  
3.56  
-2.33  
1.31  
1.29  
1.23  
1.16

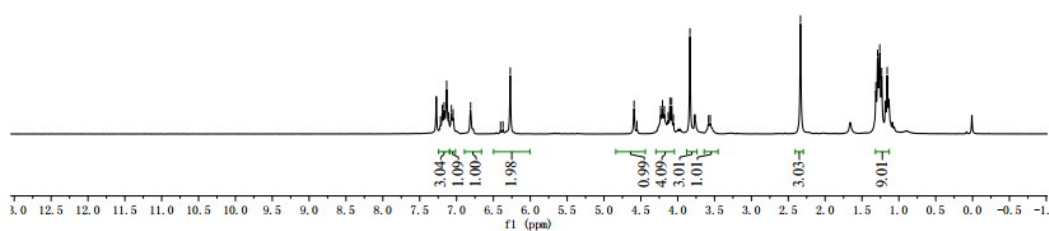

Compound 4g <sup>1</sup>H NMR

1861  
3+2

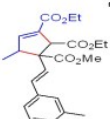

174.31  
171.13  
164.00  
148.20  
138.14  
136.45  
132.66  
131.98  
128.65  
128.46  
127.01  
125.21  
123.53  
61.56  
60.94  
60.66  
57.27  
52.78  
47.92  
21.36  
15.29  
14.20  
14.16

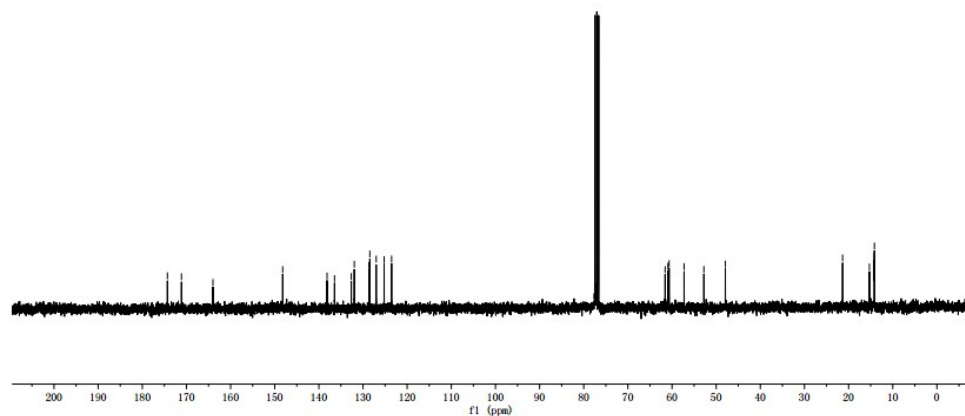

Compound 4g <sup>13</sup>C NMR

1908  
3+2

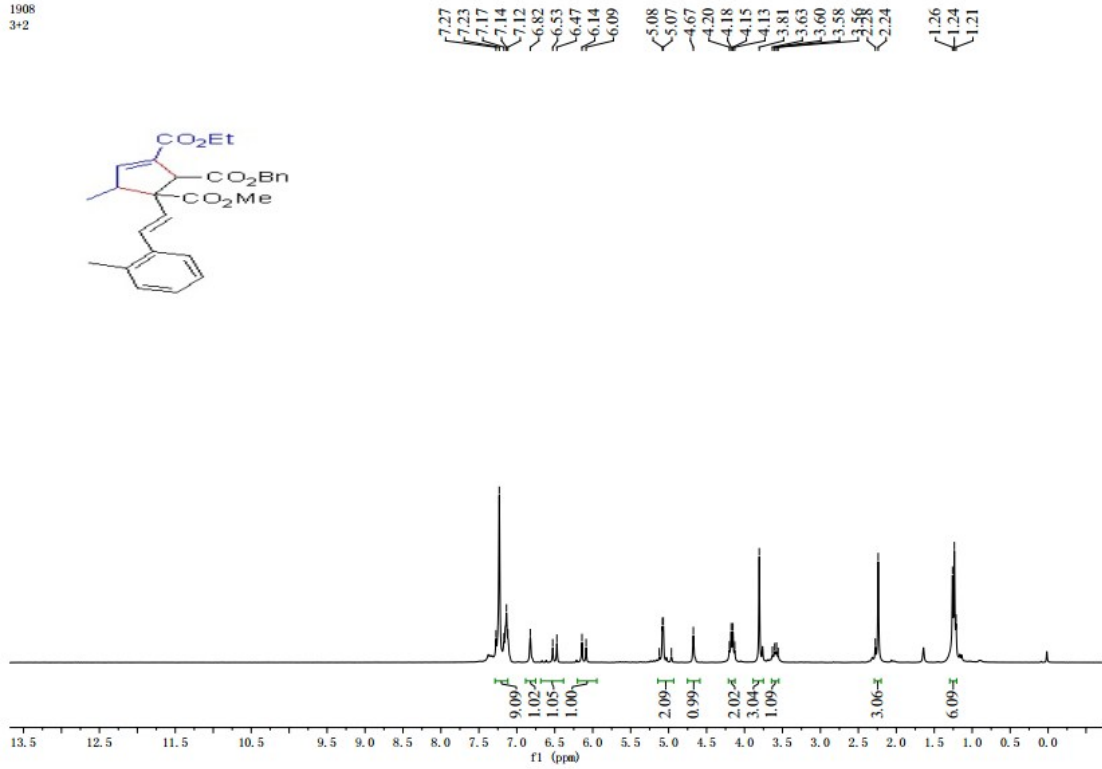

Compound 4h <sup>1</sup>H NMR

1908  
3+2

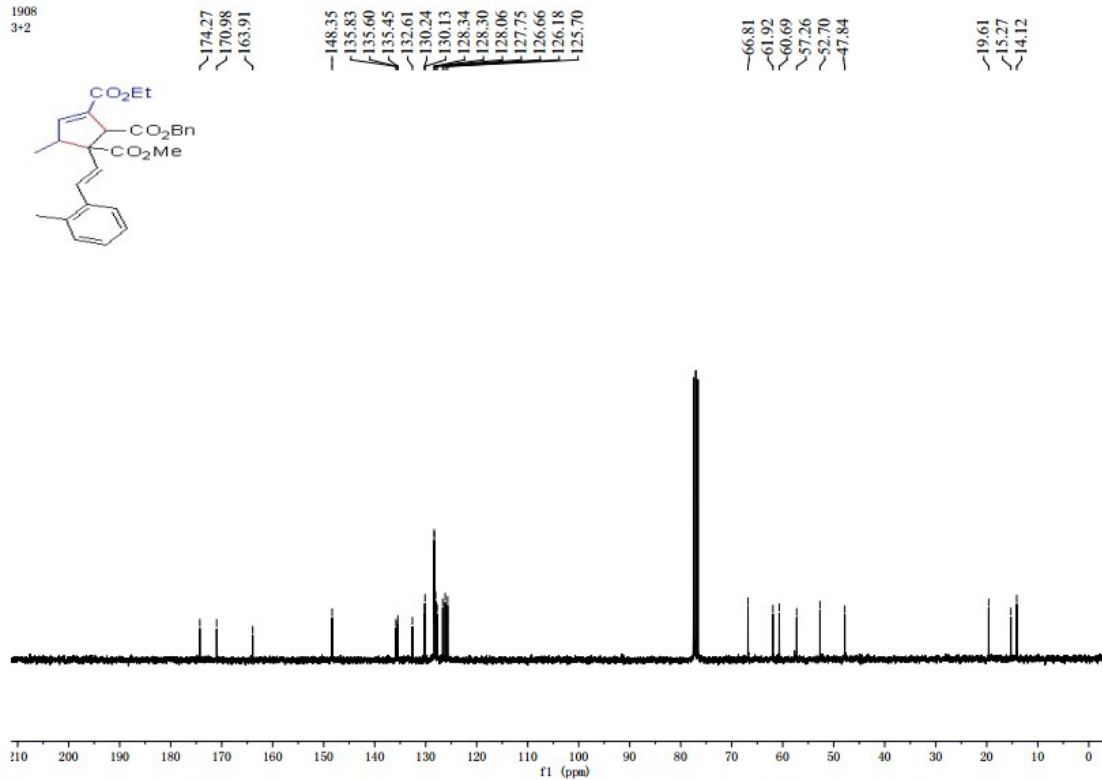

Compound 4h <sup>13</sup>C NMR

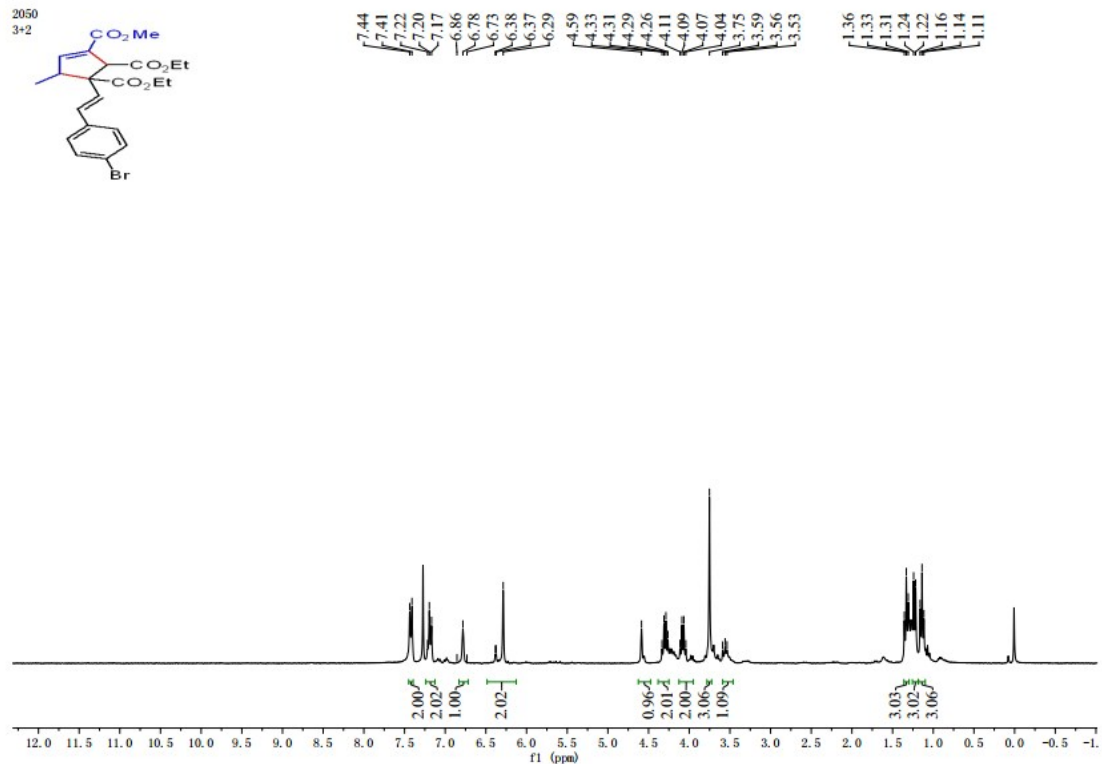

Compound 4i  $^1\text{H}$  NMR

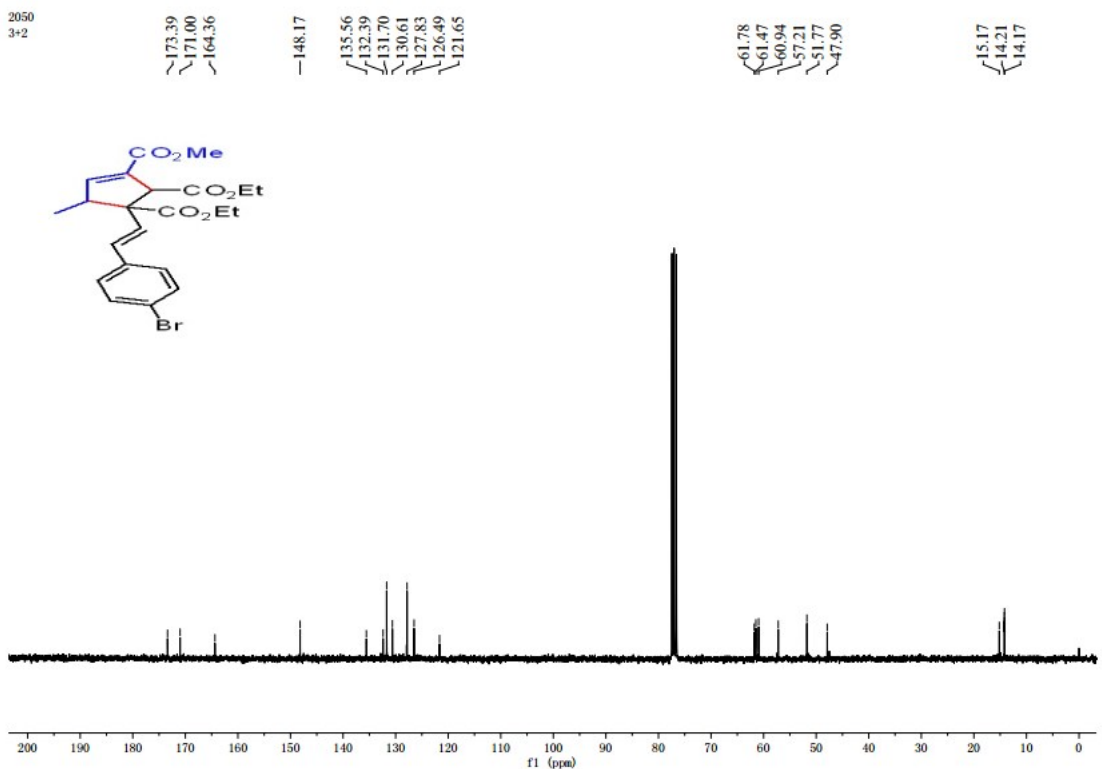

Compound 4i  $^{13}\text{C}$  NMR

## 7. X-ray crystal structure

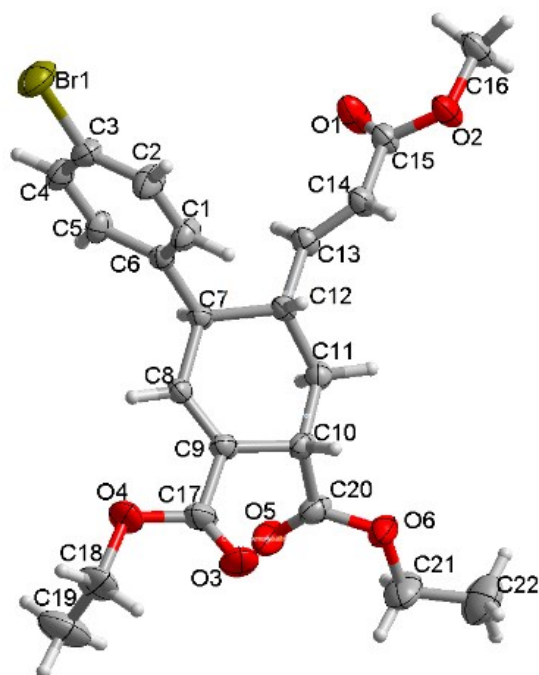

**Table 1 Crystal data and structure refinement for 3w**

|                                      |                                                  |
|--------------------------------------|--------------------------------------------------|
| Identification code                  | 20190496                                         |
| Empirical formula                    | C <sub>22</sub> H <sub>25</sub> BrO <sub>6</sub> |
| Formula weight                       | 465.33                                           |
| Temperature/K                        | 293(2)                                           |
| Crystal system                       | monoclinic                                       |
| Space group                          | P2 <sub>1</sub> /n                               |
| a/Å                                  | 6.04519(13)                                      |
| b/Å                                  | 20.9360(4)                                       |
| c/Å                                  | 18.0511(4)                                       |
| α/°                                  | 90                                               |
| β/°                                  | 98.534(2)                                        |
| γ/°                                  | 90                                               |
| Volume/Å <sup>3</sup>                | 2259.30(8)                                       |
| Z                                    | 4                                                |
| ρ <sub>calc</sub> /g/cm <sup>3</sup> | 1.368                                            |
| μ/mm <sup>-1</sup>                   | 2.765                                            |
| F(000)                               | 960.0                                            |
| Crystal size/mm <sup>3</sup>         | 0.19 × 0.14 × 0.13                               |
| Radiation                            | CuKα (λ = 1.54184)                               |
| 2θ range for data collection/°       | 8.446 to 134.14                                  |
| Index ranges                         | -5 ≤ h ≤ 7, -24 ≤ k ≤ 25,<br>-21 ≤ l ≤ 21        |

|                                                |                                                                     |
|------------------------------------------------|---------------------------------------------------------------------|
| Reflections collected                          | 8982                                                                |
| Independent reflections                        | 4030 [ $R_{\text{int}} = 0.0284$ ,<br>$R_{\text{sigma}} = 0.0359$ ] |
| Data/restraints/parameters                     | 4030/29/293                                                         |
| Goodness-of-fit on $F^2$                       | 1.032                                                               |
| Final R indexes [ $I \geq 2\sigma(I)$ ]        | $R_1 = 0.0588$ , $wR_2 = 0.1584$                                    |
| Final R indexes [all data]                     | $R_1 = 0.0708$ , $wR_2 = 0.1732$                                    |
| Largest diff. peak/hole / $e \text{ \AA}^{-3}$ | 1.03/-0.68                                                          |

### $^1\text{H}$ and $^{13}\text{C}$ NMR Spectral Data of 4a

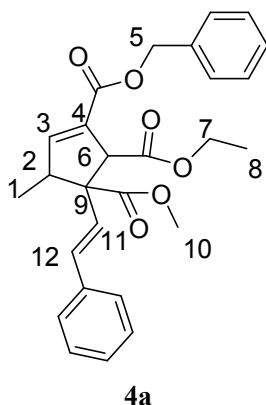

| Position | $^1\text{H}$ NMR (300 MHz)                                  | $^{13}\text{C}$ NMR (75 MHz) |
|----------|-------------------------------------------------------------|------------------------------|
| 1        | 1.13 (d, $J = 7.3$ Hz, 3H, $\text{CH}_3$ ) ppm              | 14.0 ppm                     |
| 2        | 3.52 – 3.54 (m, 1H, CH) ppm                                 | 46.6 ppm                     |
| 3        | 6.82 (s, 1H, $\text{CH}=\text{C}$ ) ppm                     | 147.1 ppm                    |
| 4        |                                                             | 131.9 ppm                    |
| 5        | 5.19 (q, $J = 12.5$ Hz, 2H, $\text{COOCH}_2\text{Ph}$ ) ppm | 65.4 ppm                     |
| 6        | 4.57 (s, 1H, CH)                                            | 56.8 ppm                     |
| 7        | 3.86 – 3.94 (m, 2H, $\text{COOCH}_2$ ) ppm                  | 59.9 ppm                     |
| 8        | 0.99 (t, $J = 7.1$ Hz, 3H, $\text{CH}_3$ ) ppm              | 13.1 ppm                     |

|    |                                       |           |
|----|---------------------------------------|-----------|
| 9  |                                       | 60.8 ppm  |
| 10 | 3.75 (s, 3H, COOCH <sub>3</sub> ) ppm | 51.3 ppm  |
| 11 | 6.35 (d, $J = 16.4$ Hz, 1H, C=CH)     | 126.9 ppm |
|    | ppm                                   |           |
| 12 | 6.45 (d, $J = 16.4$ Hz, 1H, CH=C)     | 135.6 ppm |
|    | ppm                                   |           |

---

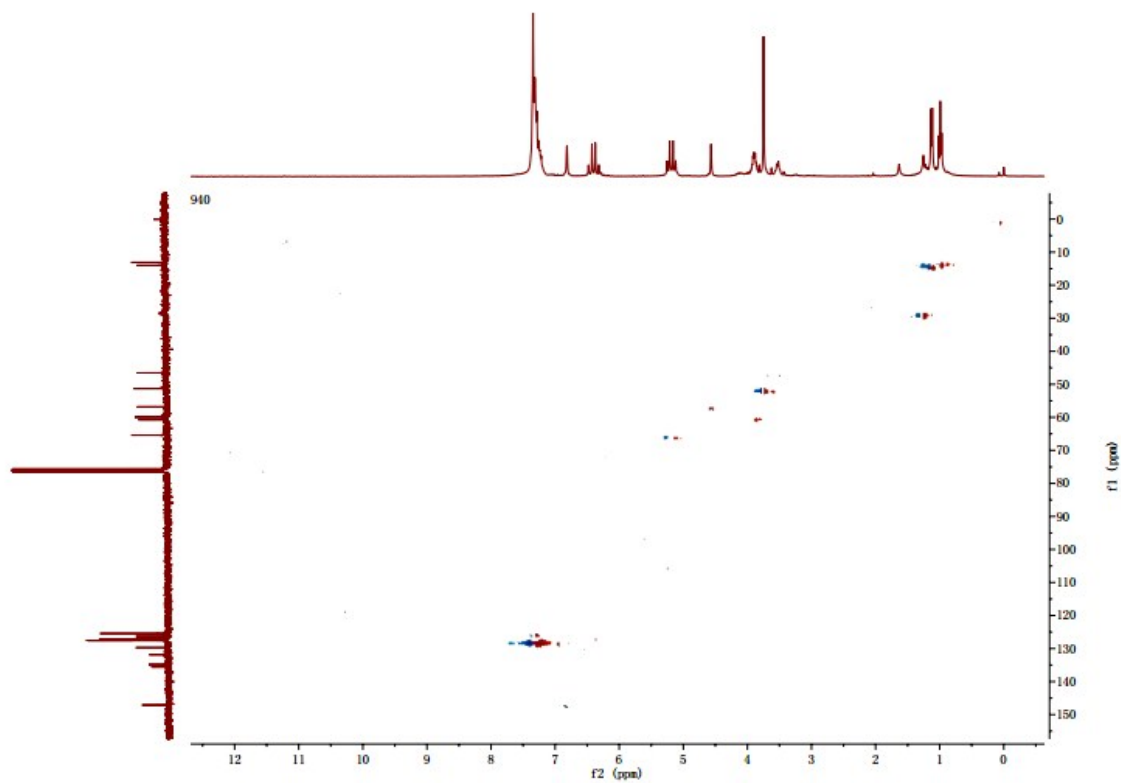



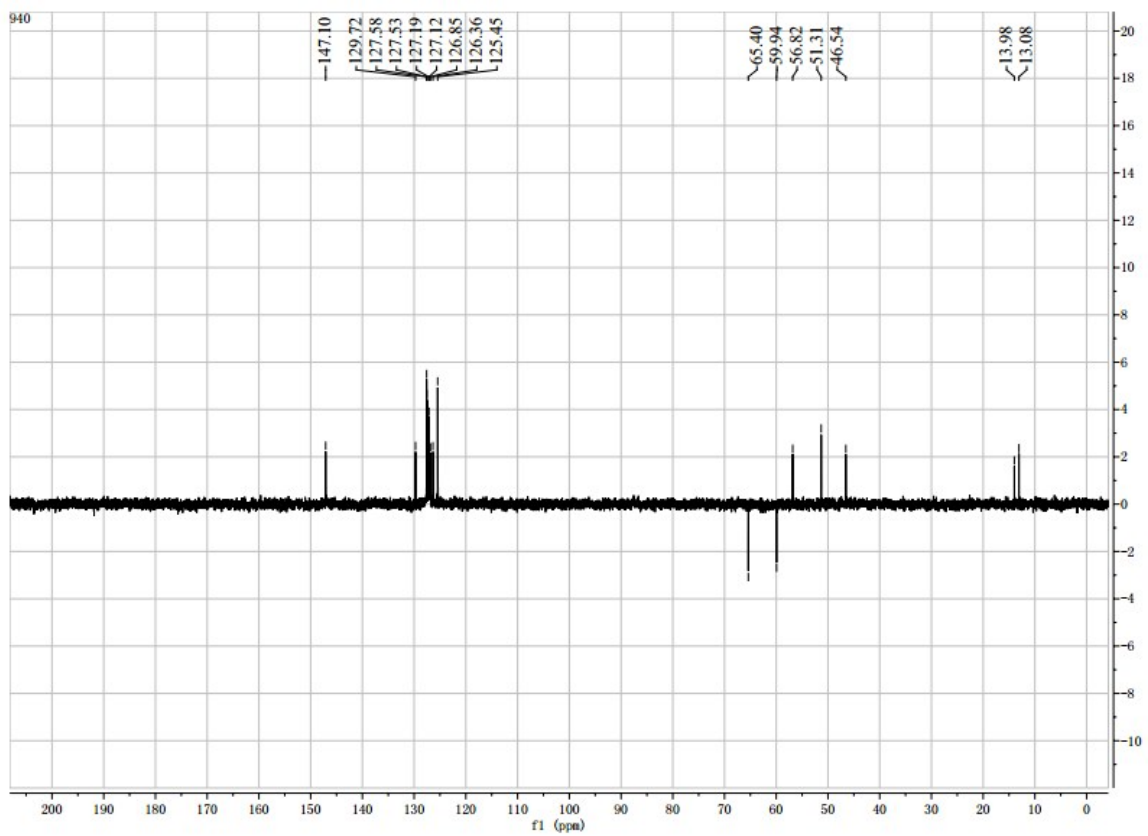

Supplement: c9cc05207k1.pdf [file c9cc05207k1.pdf]
